# Supplementary material
Source: MDPI journal article supplement (https://www.mdpi.com/1424-8247/17/2/231)
Supplement: s1 [file s1]

## **Supplementary Materials**

### **Anticancer Evaluation of Novel Benzofuran-Indole Hybrids as EGFR Inhibitors Against Non-Small Cell Lung Cancer Cells**

#### **Table of Contents**

|                                                                    |               |
|--------------------------------------------------------------------|---------------|
| Copies of $^1\text{H}$ and $^{13}\text{C}$ NMR spectra of <b>7</b> | <b>S3-19</b>  |
| Copies of $^1\text{H}$ and $^{13}\text{C}$ NMR spectra of <b>8</b> | <b>S20-49</b> |
| Copies of HRMS spectra of <b>7</b>                                 | <b>S50-58</b> |
| Copies of HRMS spectra of <b>8</b>                                 | <b>S59-73</b> |
| HPLC Chromatogram of <b>8aa</b>                                    | <b>S74-75</b> |

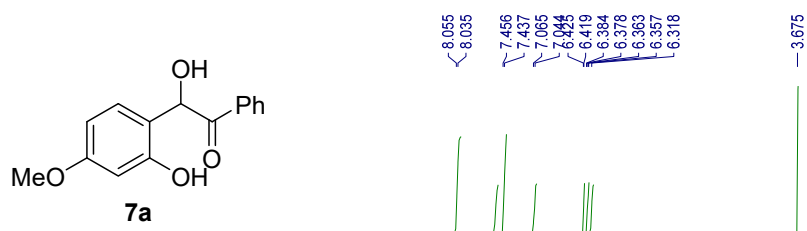

$^1\text{H}$  NMR spectrum of **7a** (400 MHz,  $(\text{CD}_3)_2\text{CO}$ )

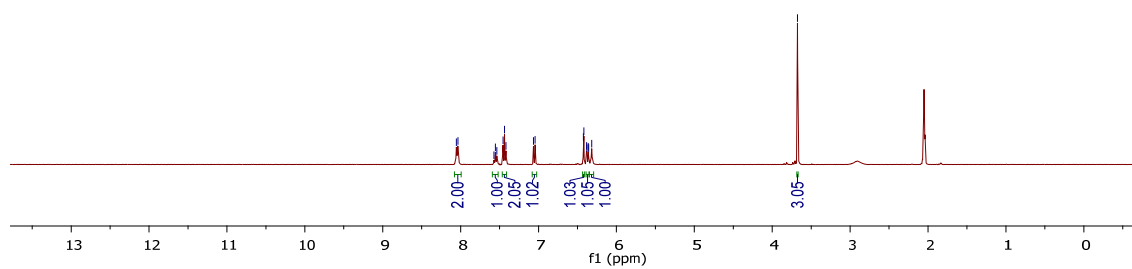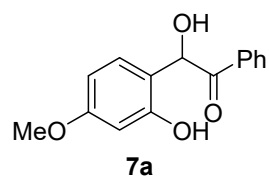

$^{13}\text{C}$  NMR spectrum of **7a** (100 MHz,  $\text{CDCl}_3$ )

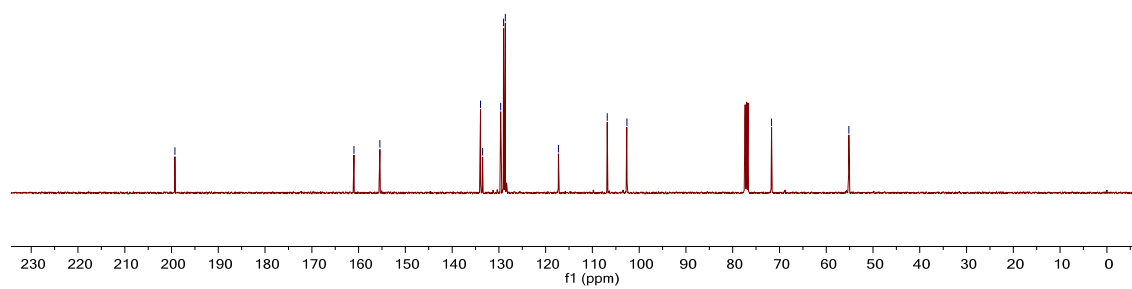

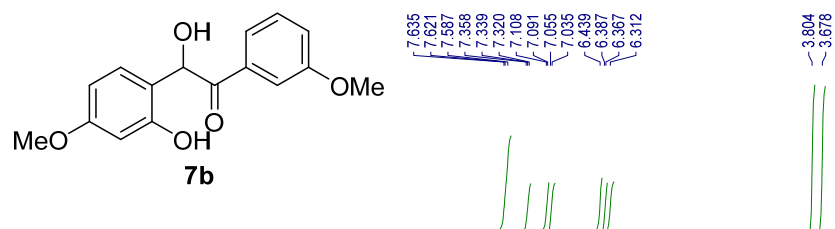

<sup>1</sup>H NMR spectrum of **7b** (400 MHz, (CD<sub>3</sub>)<sub>2</sub>CO)

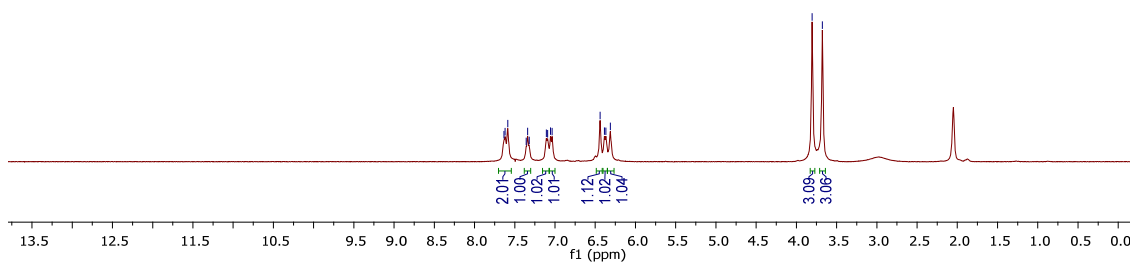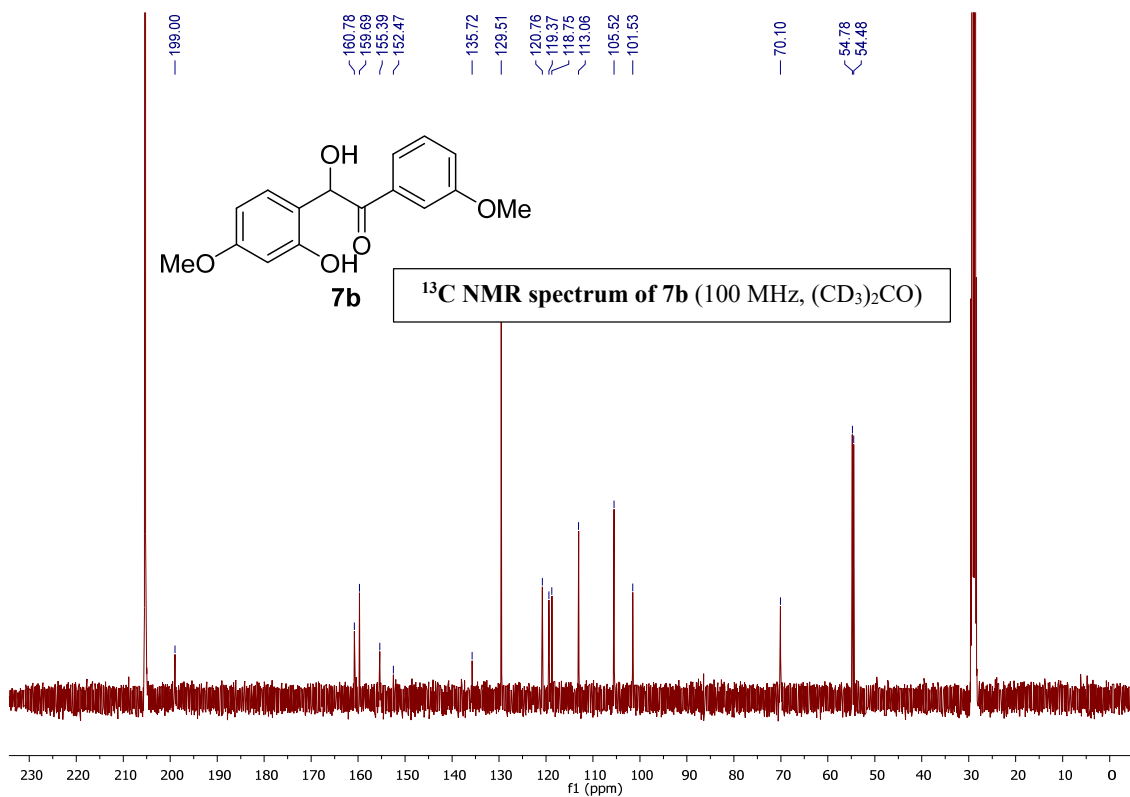

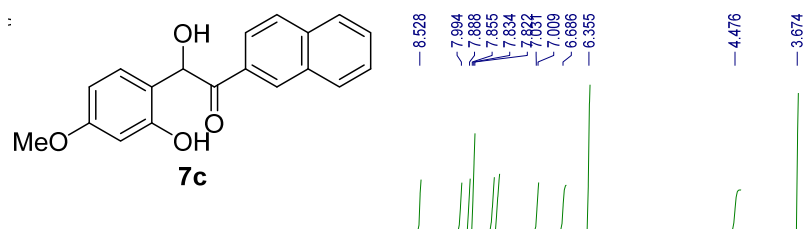

<sup>1</sup>H NMR spectrum of **7c** (400 MHz, CDCl<sub>3</sub>)

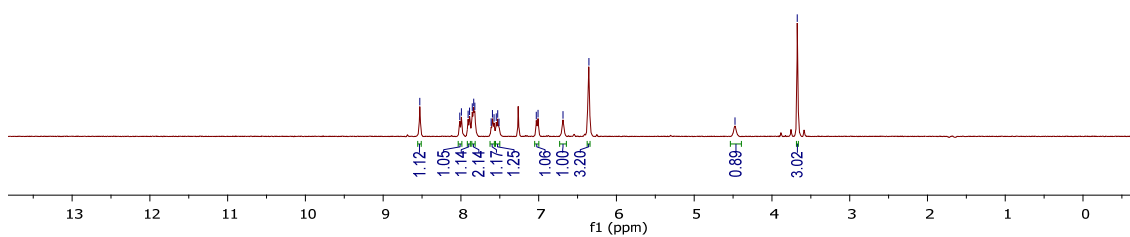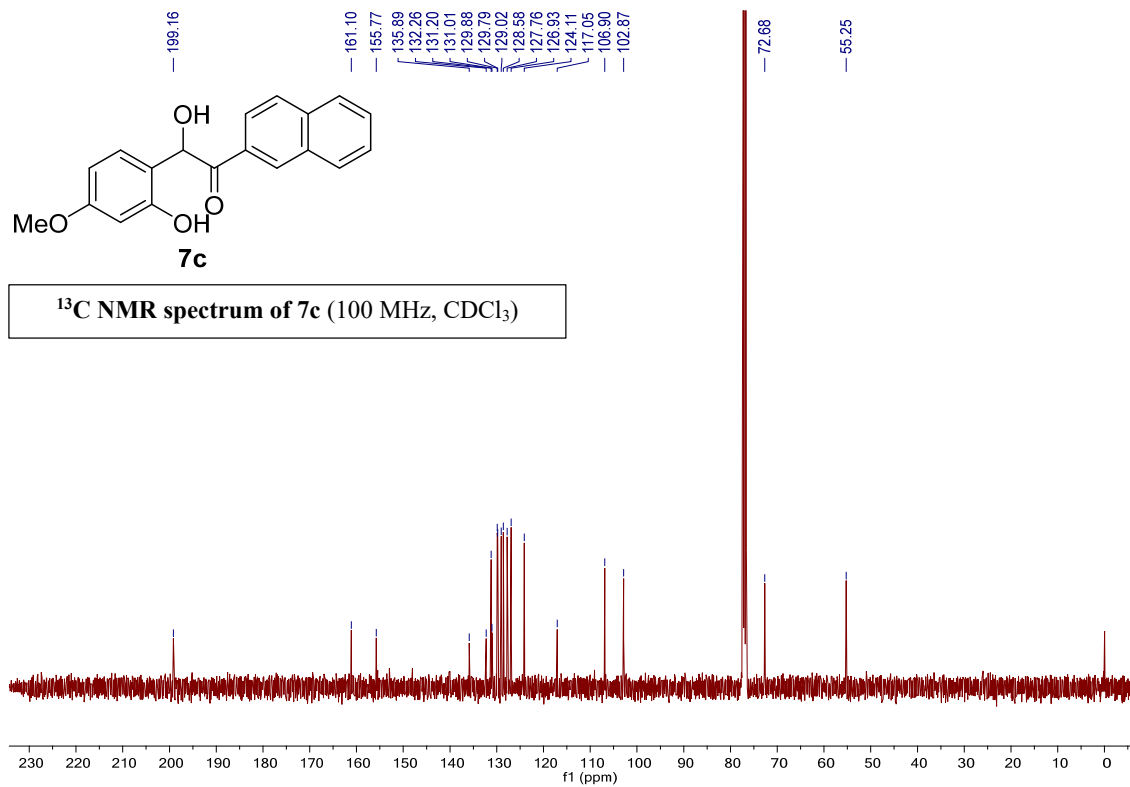



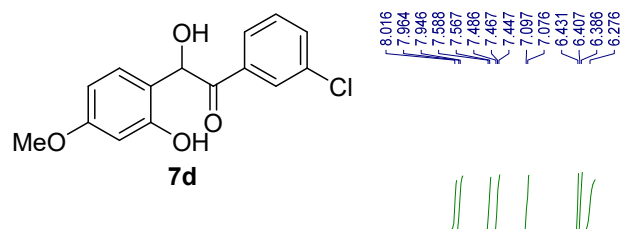

<sup>1</sup>H NMR spectrum of **7d** (400 MHz, (CD<sub>3</sub>)<sub>2</sub>CO)

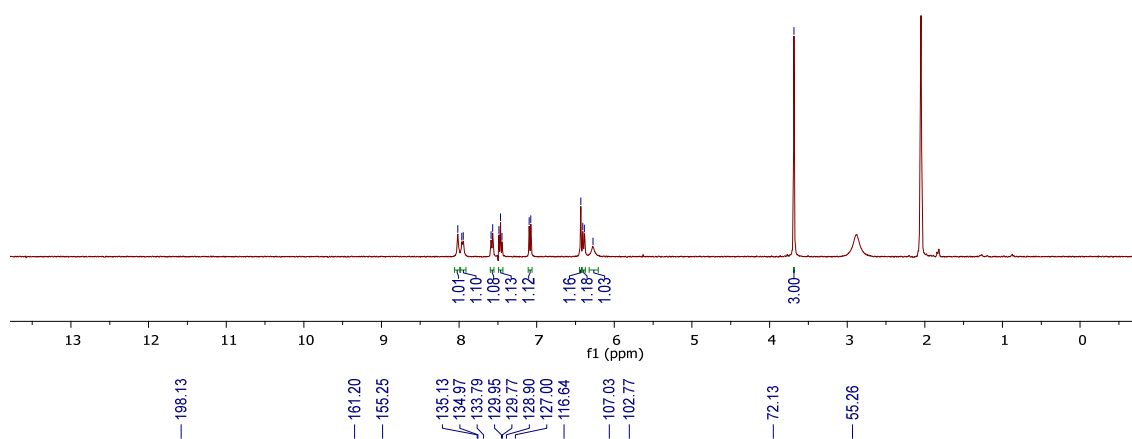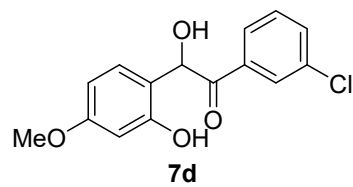

<sup>13</sup>C NMR spectrum of **7d** (100 MHz, CDCl<sub>3</sub>)

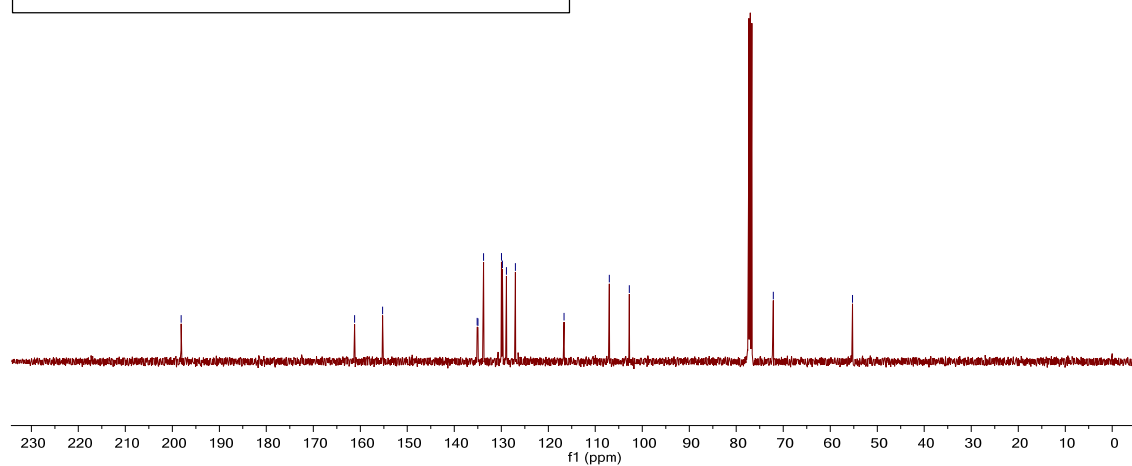

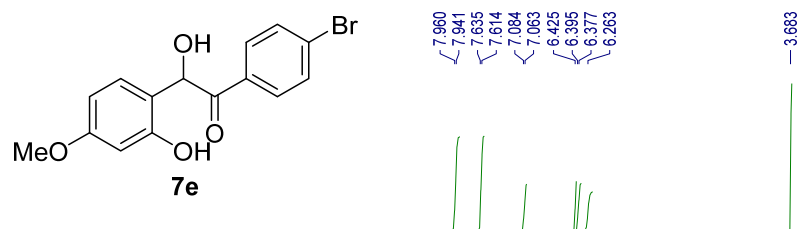

$^1\text{H}$  NMR spectrum of **7e** (400 MHz,  $(\text{CD}_3)_2\text{CO}$ )

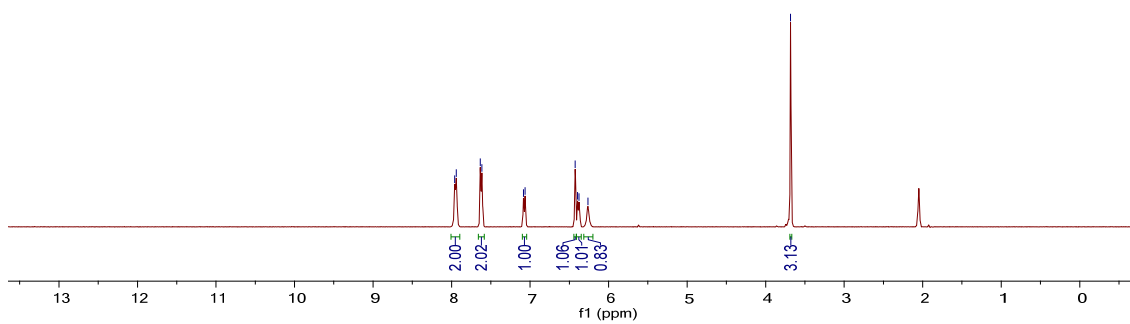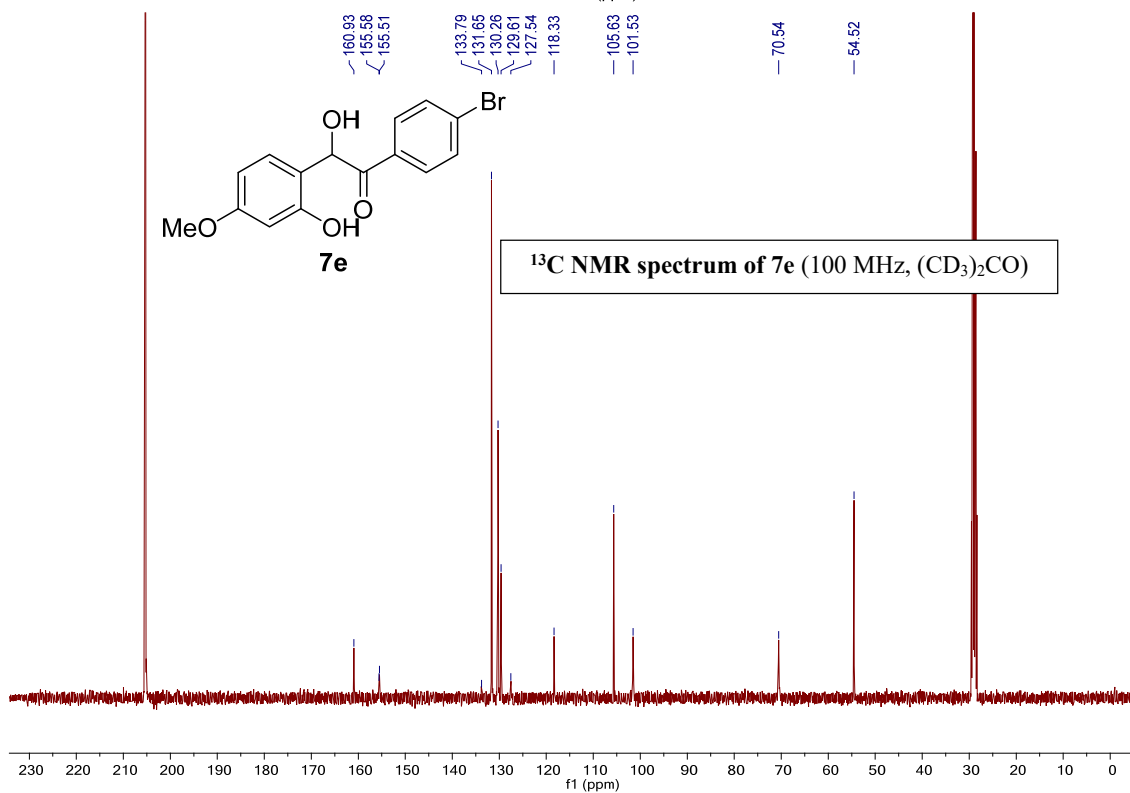

$^{13}\text{C}$  NMR spectrum of **7e** (100 MHz,  $(\text{CD}_3)_2\text{CO}$ )

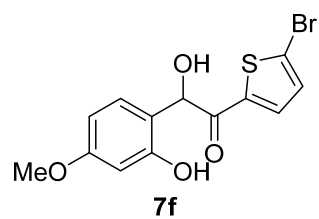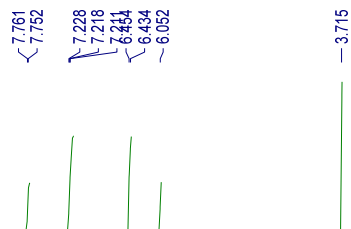

$^1\text{H}$  NMR spectrum of **7f** (400 MHz,  $(\text{CD}_3)_2\text{CO}$ )

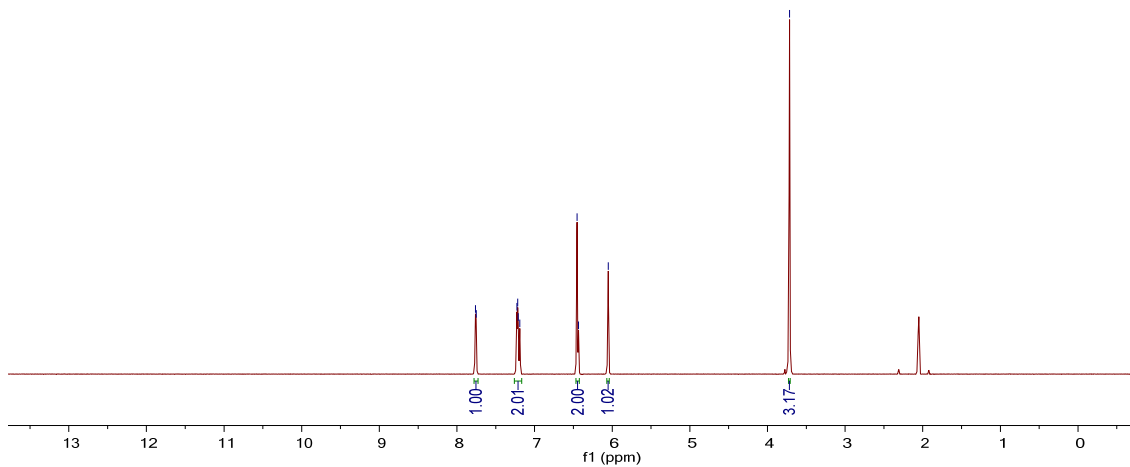

Z

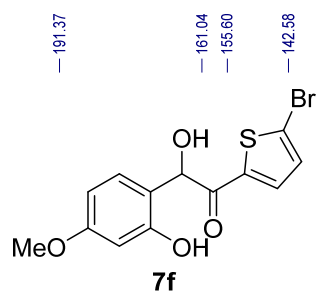

$^{13}\text{C}$  NMR spectrum of **7f** (100 MHz,  $(\text{CD}_3)_2\text{CO}$ )

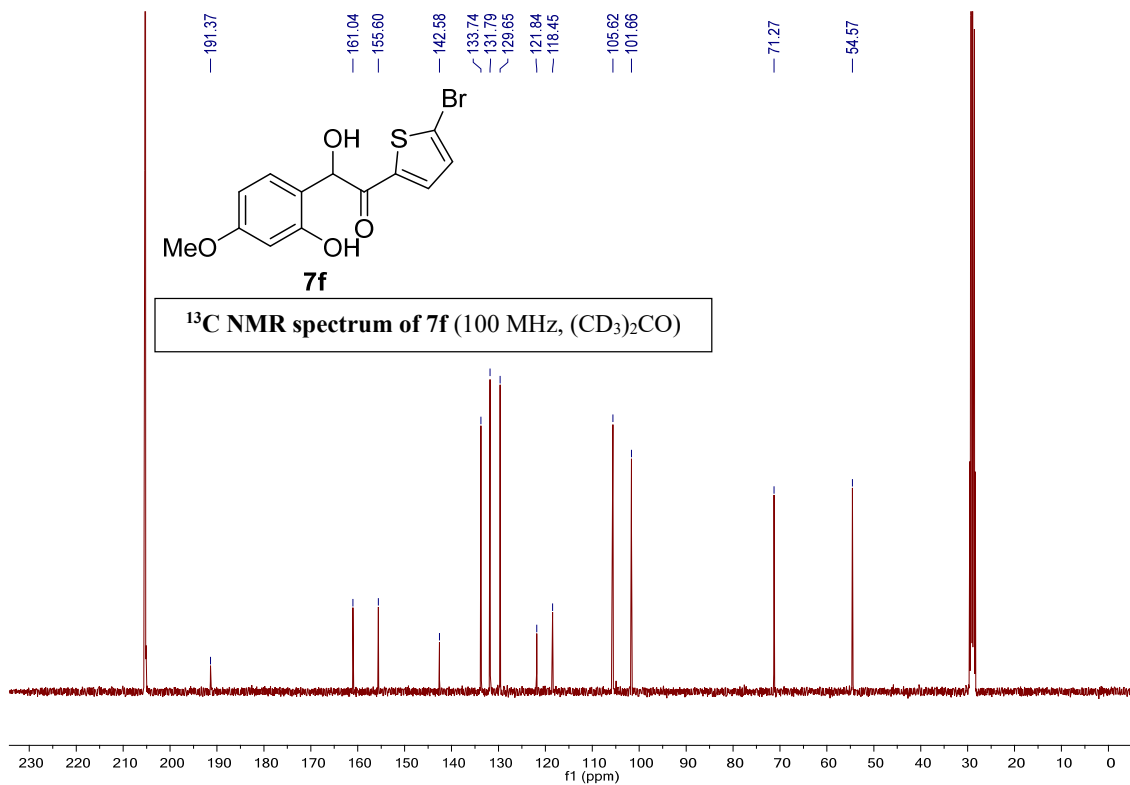

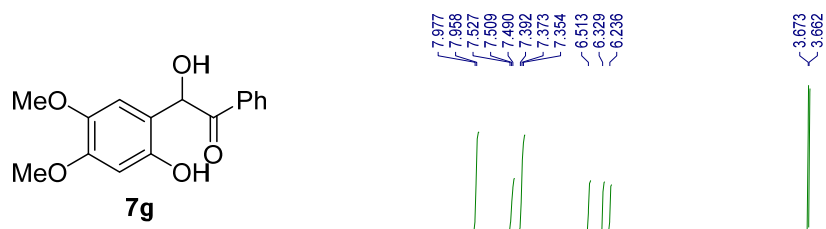

$^1\text{H}$  NMR spectrum of **7g** (400 MHz,  $\text{CDCl}_3$ )

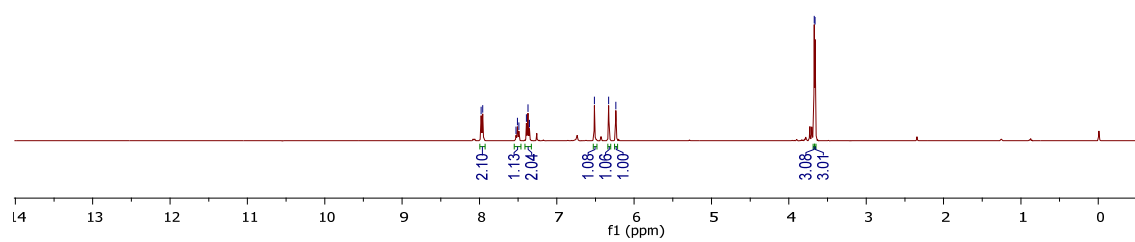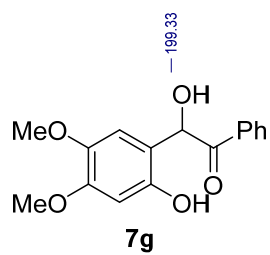

$^{13}\text{C}$  NMR spectrum of **7g** (100 MHz,  $\text{CDCl}_3$ )

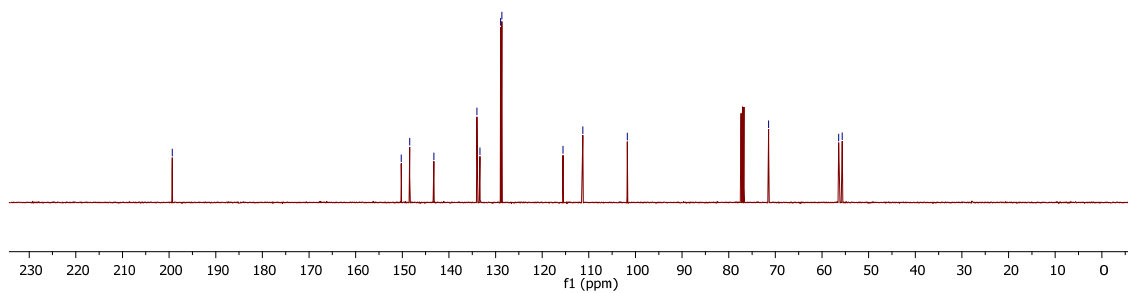

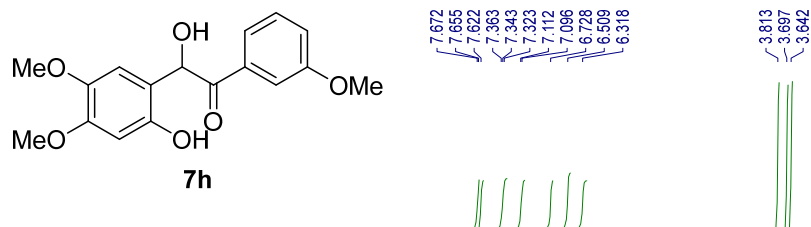

$^1\text{H}$  NMR spectrum of **7h** (400 MHz,  $(\text{CD}_3)_2\text{CO}$ )

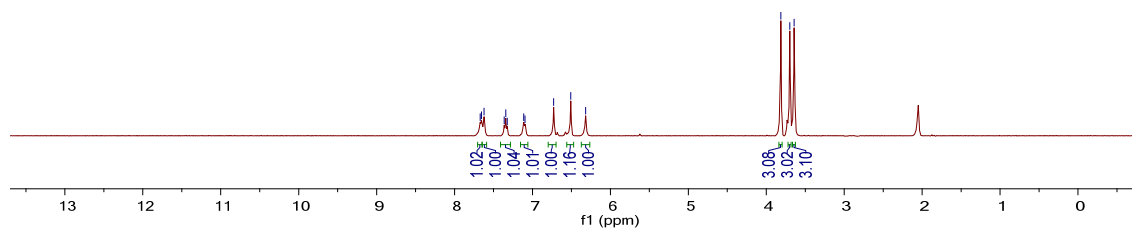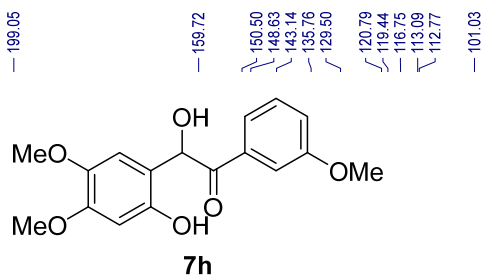

$^{13}\text{C}$  NMR spectrum of **7h** (100 MHz,  $(\text{CD}_3)_2\text{CO}$ )

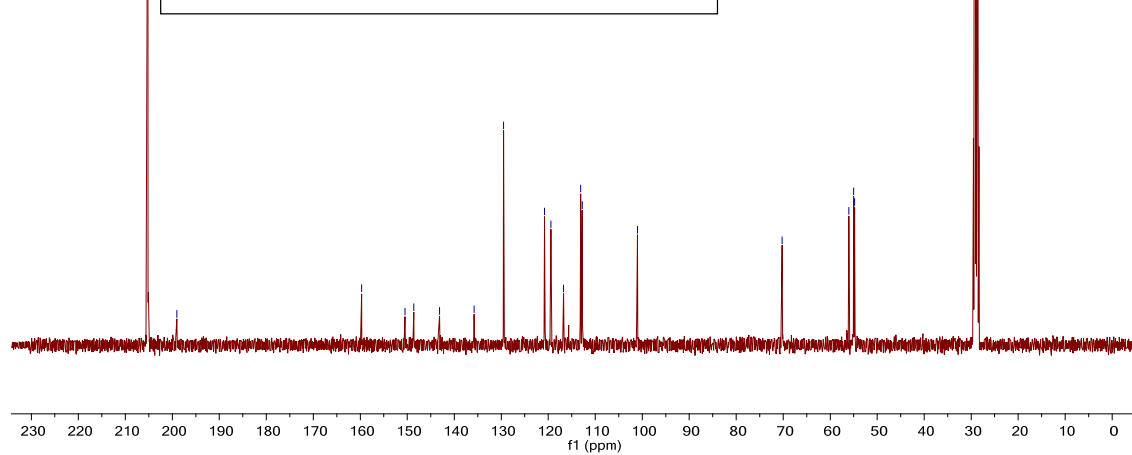

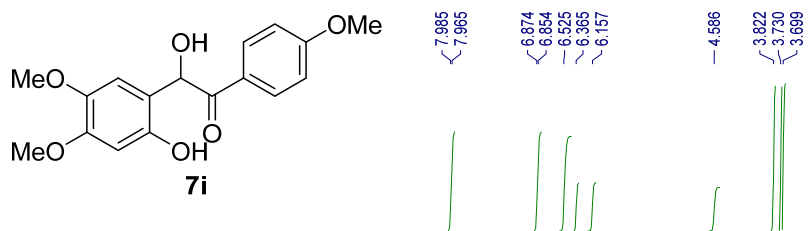

$^1\text{H}$  NMR spectrum of **7i** (400 MHz,  $\text{CDCl}_3$ )

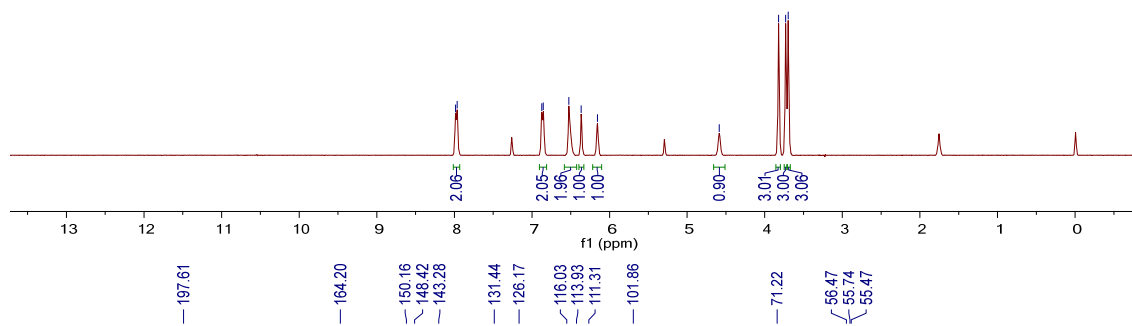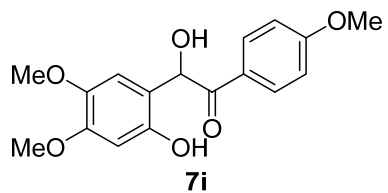

$^{13}\text{C}$  NMR spectrum of **7i** (100 MHz,  $\text{CDCl}_3$ )

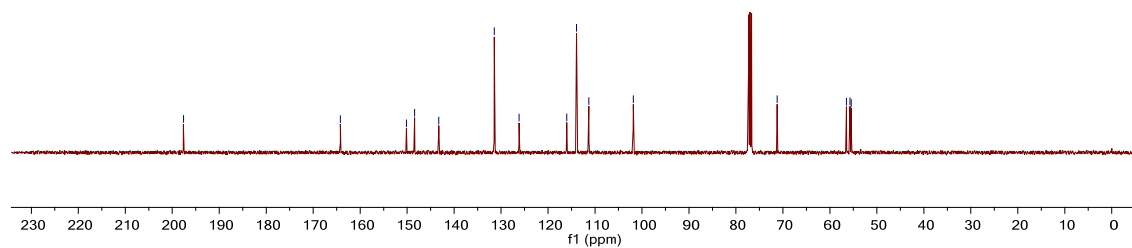

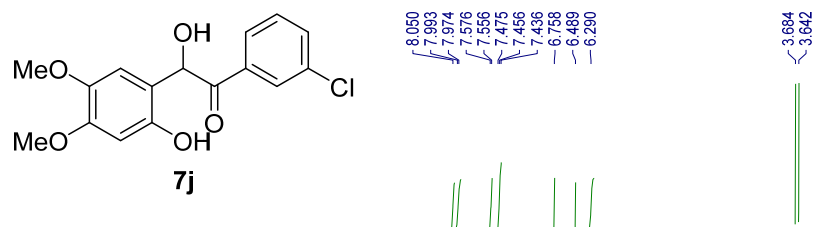

$^1\text{H}$  NMR spectrum of **7j** (400 MHz,  $(\text{CD}_3)_2\text{CO}$ )

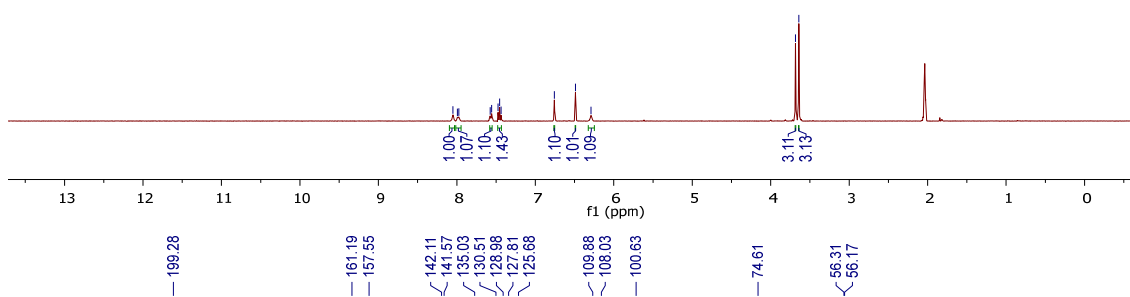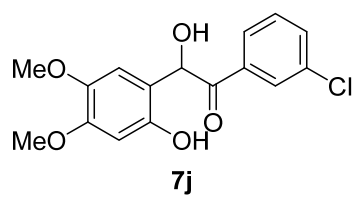

$^{13}\text{C}$  NMR spectrum of **7j** (100 MHz,  $\text{CDCl}_3$ )

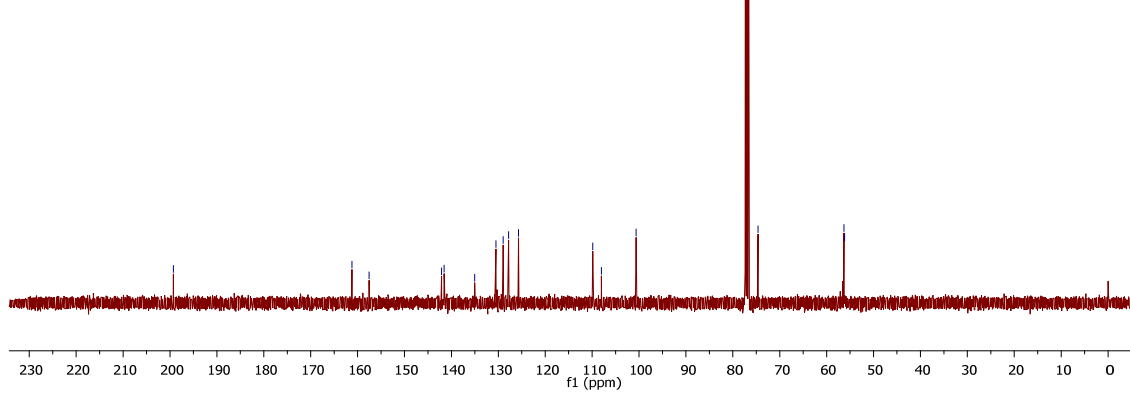

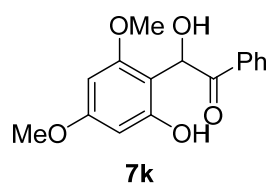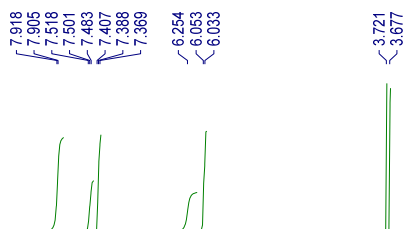

<sup>1</sup>H NMR spectrum of **7k** (400 MHz, (CD<sub>3</sub>)<sub>2</sub>CO)

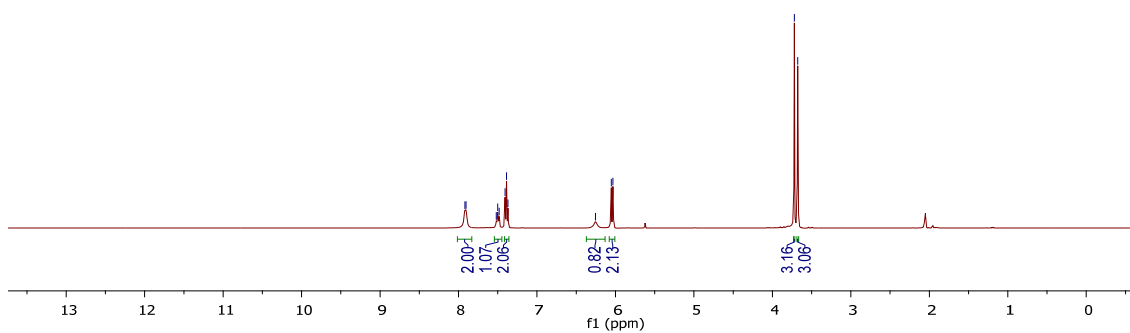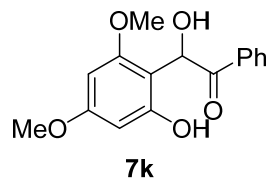

<sup>13</sup>C NMR spectrum of **7k** (100 MHz, CDCl<sub>3</sub>)

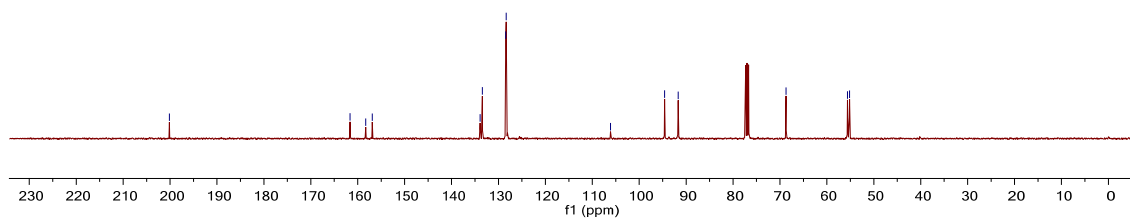



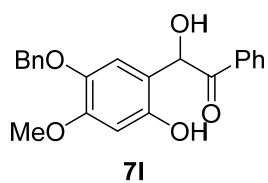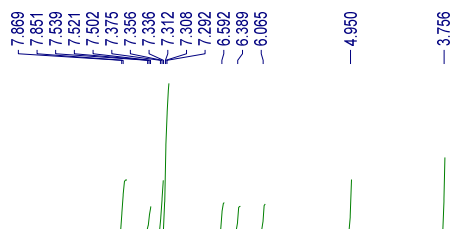

<sup>1</sup>H NMR spectrum of **7l** (400 MHz, CDCl<sub>3</sub>)

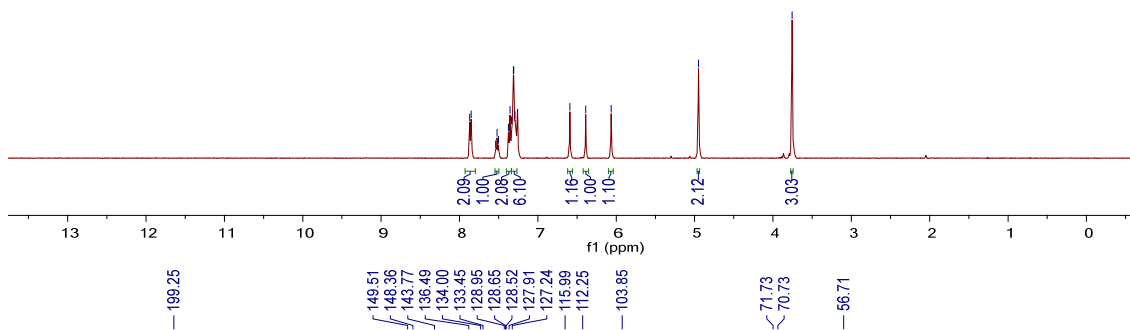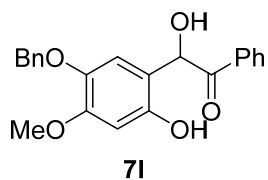

<sup>13</sup>C NMR spectrum of **7l** (100 MHz, CDCl<sub>3</sub>)

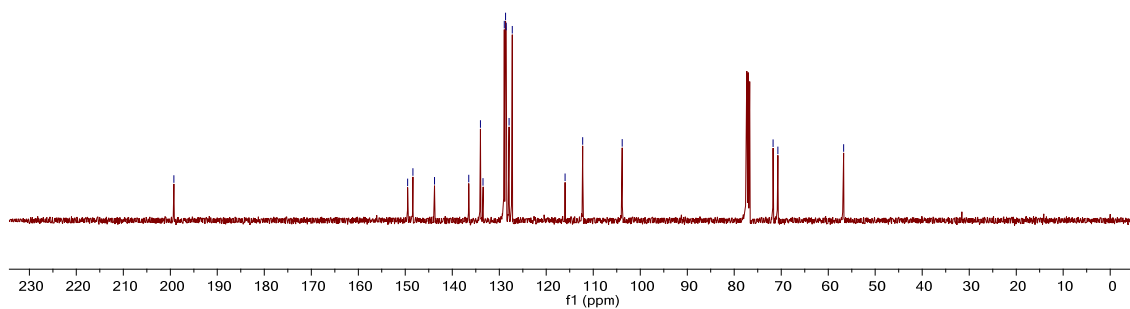

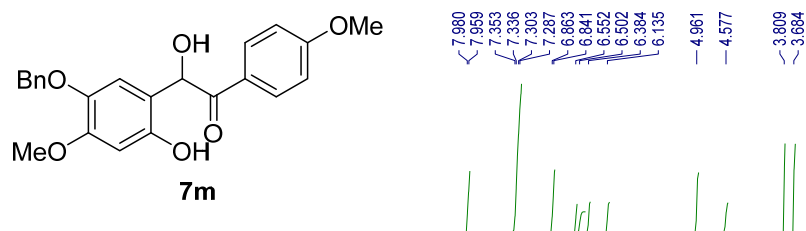

$^1\text{H}$  NMR spectrum of **7m** (400 MHz,  $\text{CDCl}_3$ )

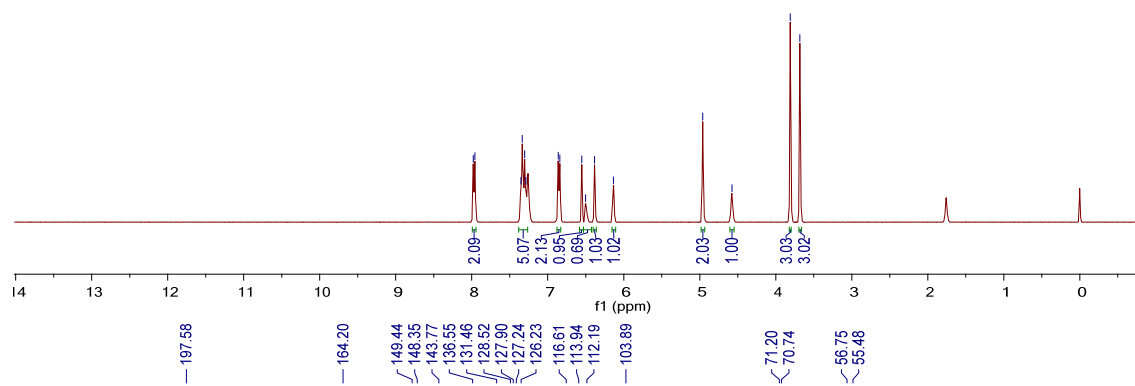

$^{13}\text{C}$  NMR spectrum of **7m** (100 MHz,  $\text{CDCl}_3$ )

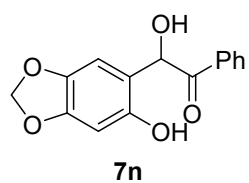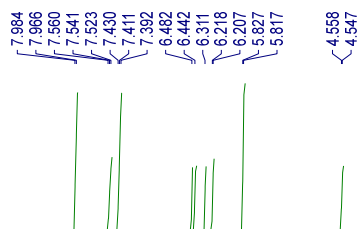

<sup>1</sup>H NMR spectrum of **7n** (400 MHz, CDCl<sub>3</sub>)

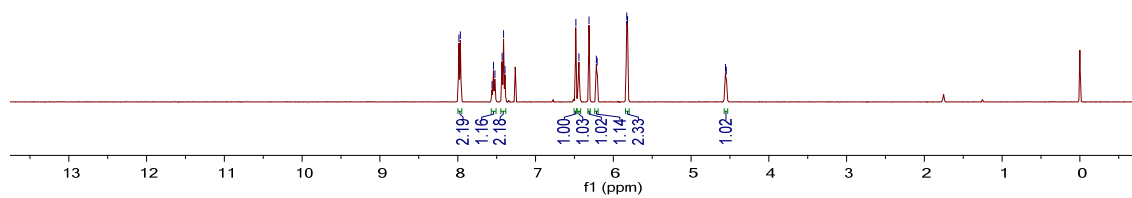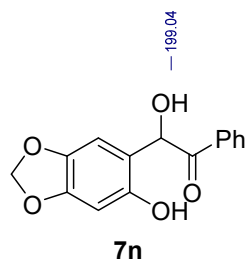

<sup>13</sup>C NMR spectrum of **7n** (100 MHz, CDCl<sub>3</sub>)

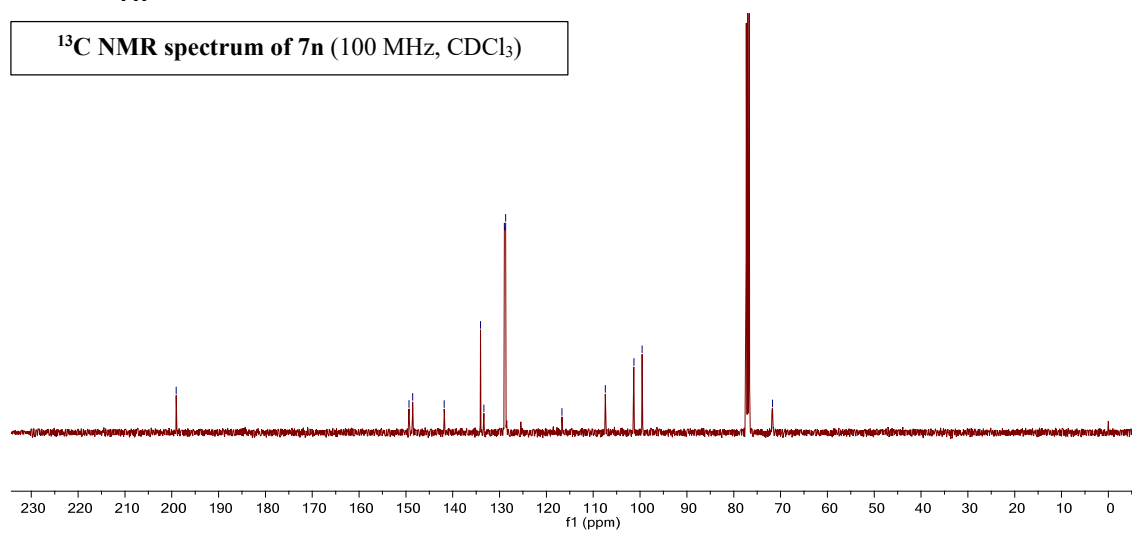

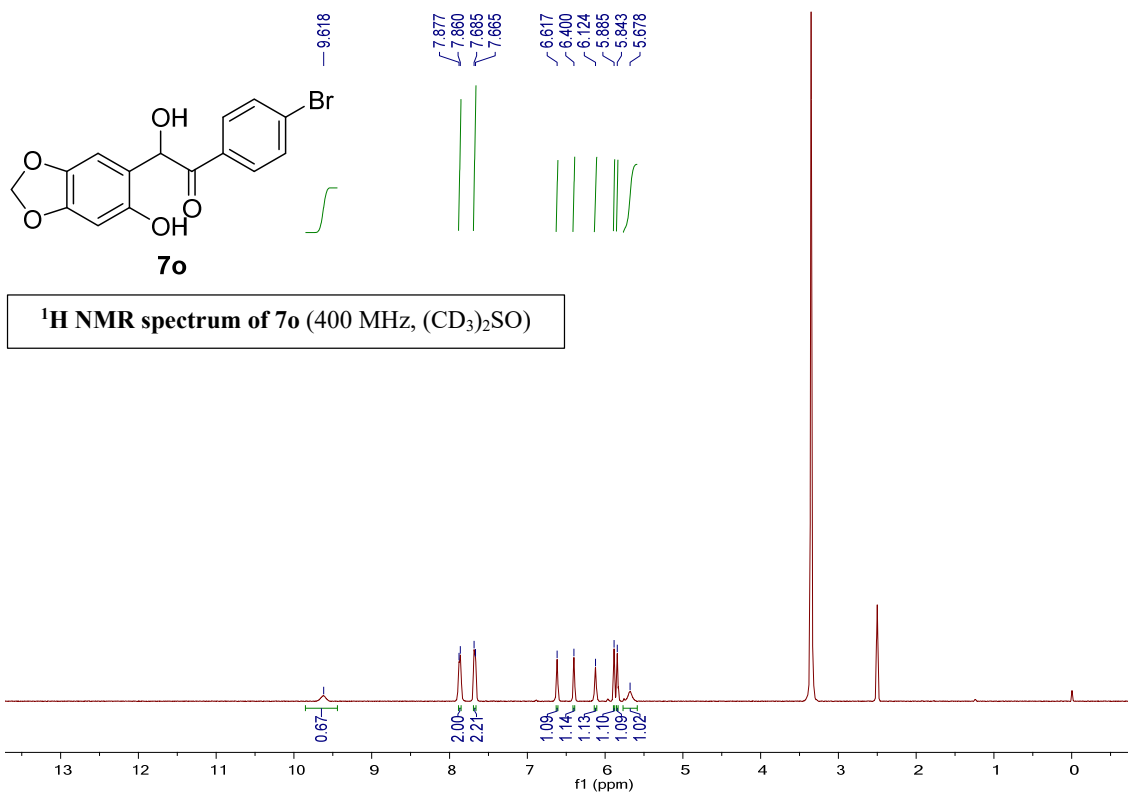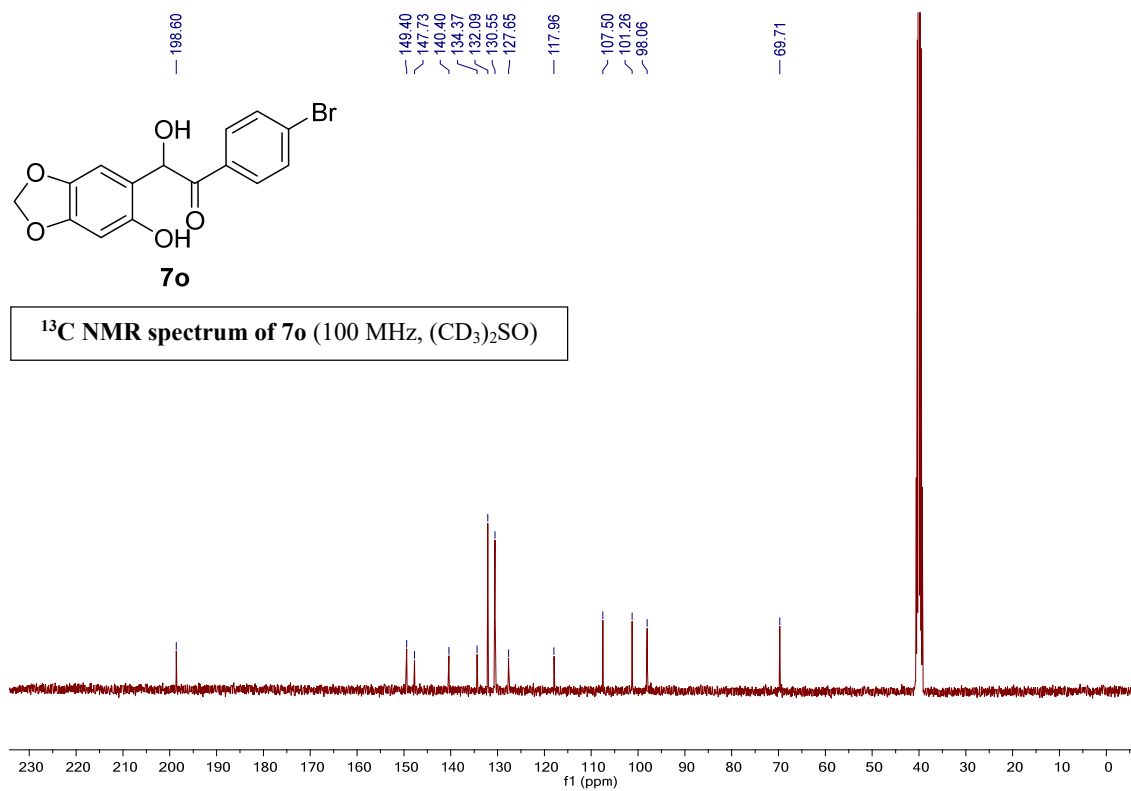

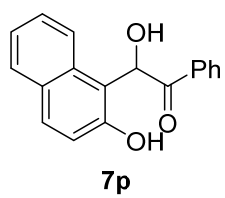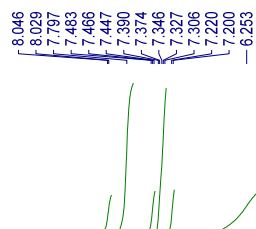

<sup>1</sup>H NMR spectrum of **7p** (400 MHz, (CD<sub>3</sub>)<sub>2</sub>CO)

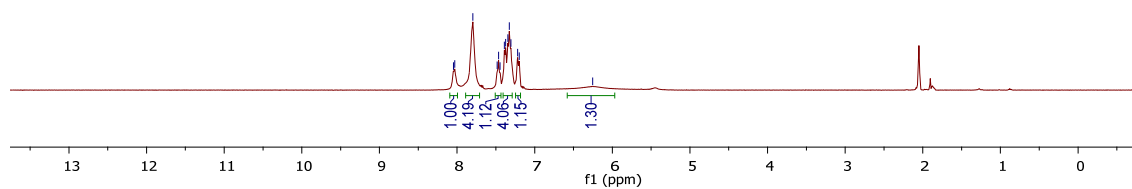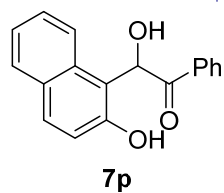

<sup>13</sup>C NMR spectrum of **7p** (100 MHz, (CD<sub>3</sub>)<sub>2</sub>CO)

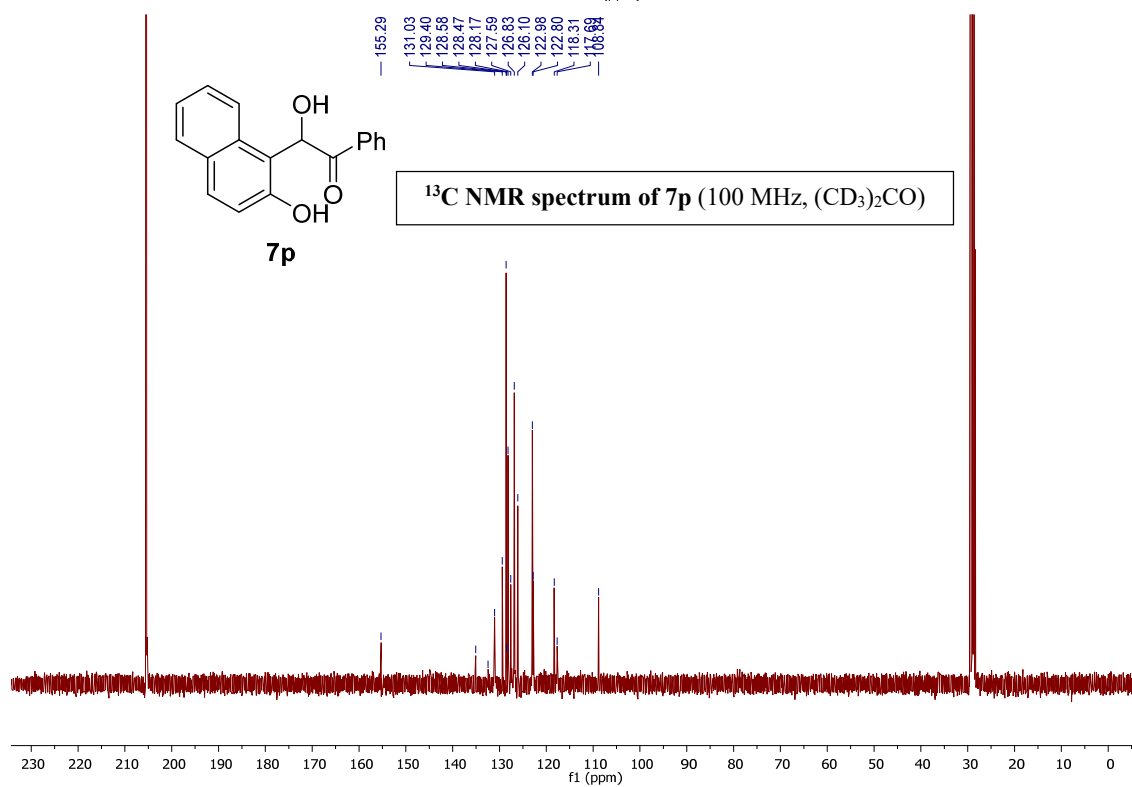

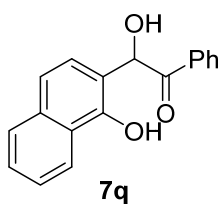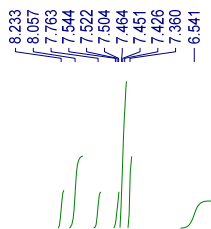

<sup>1</sup>H NMR spectrum of **7q** (400 MHz, (CD<sub>3</sub>)<sub>2</sub>CO)

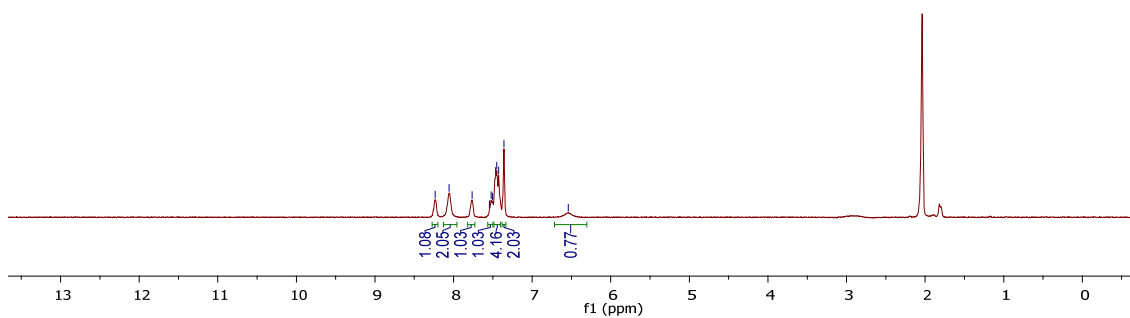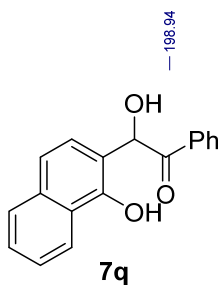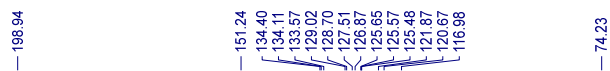

<sup>13</sup>C NMR spectrum of **7q** (100 MHz, CDCl<sub>3</sub>)

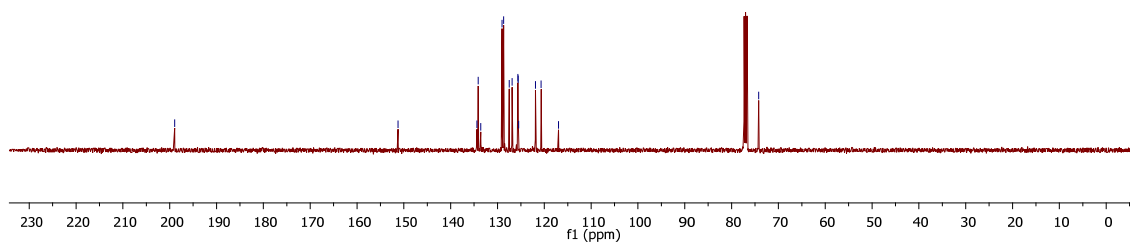

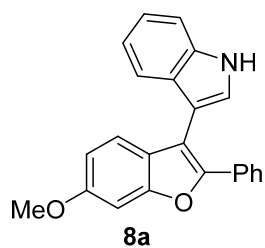

**<sup>1</sup>H NMR spectrum of 8a (400 MHz, CDCl<sub>3</sub>)**

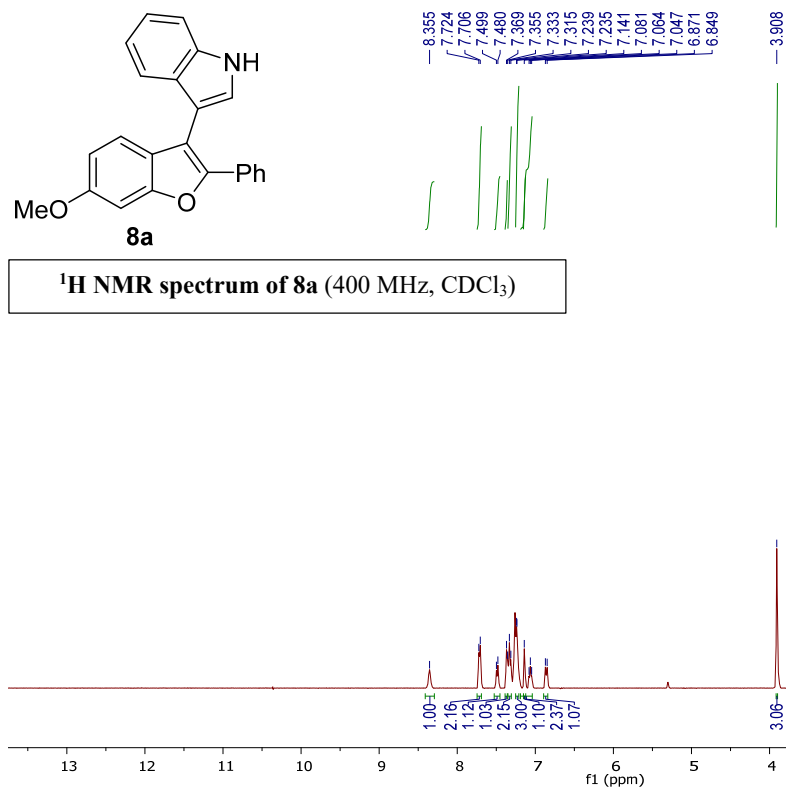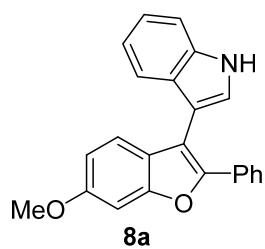

**<sup>13</sup>C NMR spectrum of 8a (100 MHz, CDCl<sub>3</sub>)**

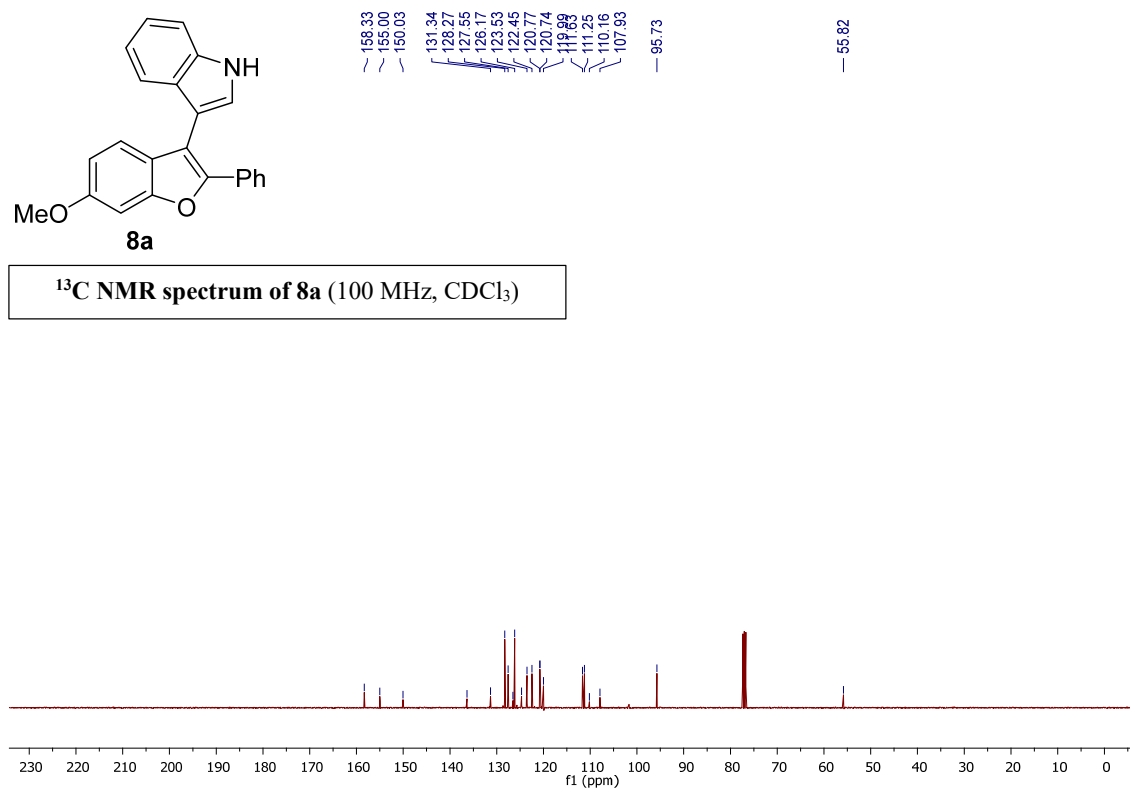

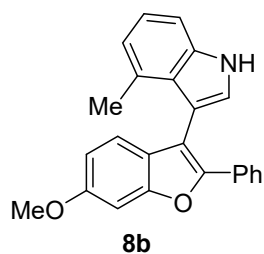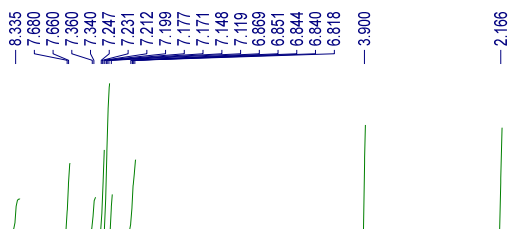

<sup>1</sup>H NMR spectrum of **8b** (400 MHz, CDCl<sub>3</sub>)

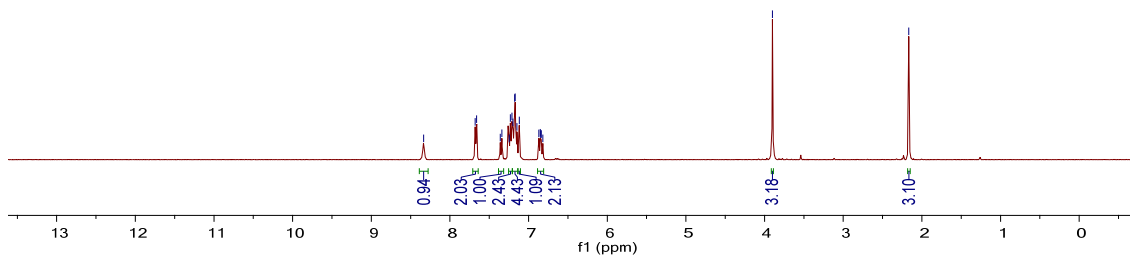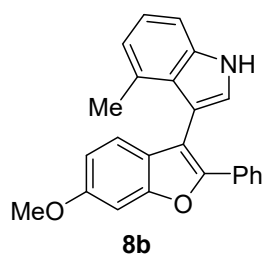

<sup>13</sup>C NMR spectrum of **8b** (100 MHz, CDCl<sub>3</sub>)

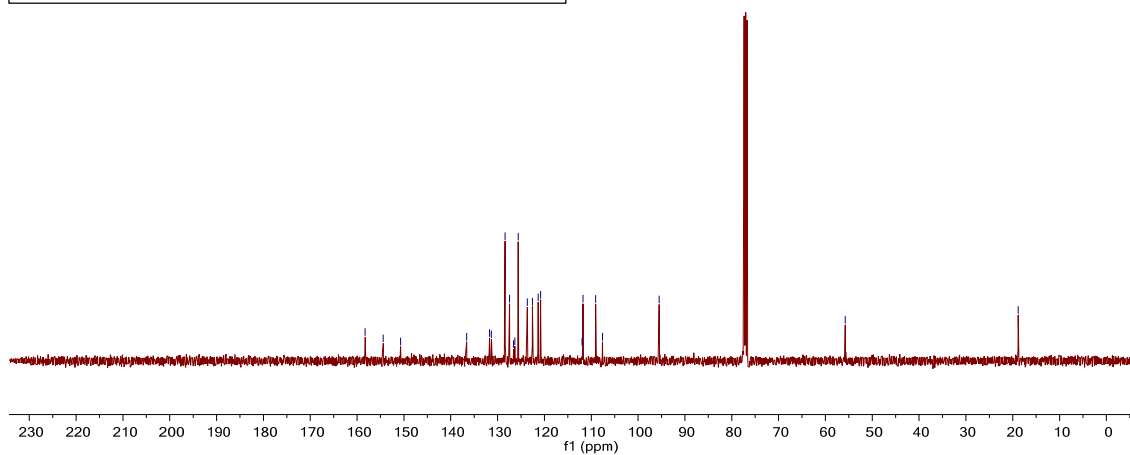



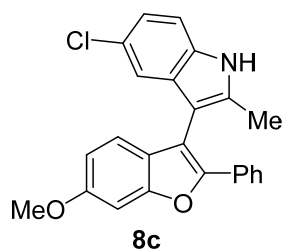

<sup>1</sup>H NMR spectrum of **8c** (400 MHz, CDCl<sub>3</sub>)

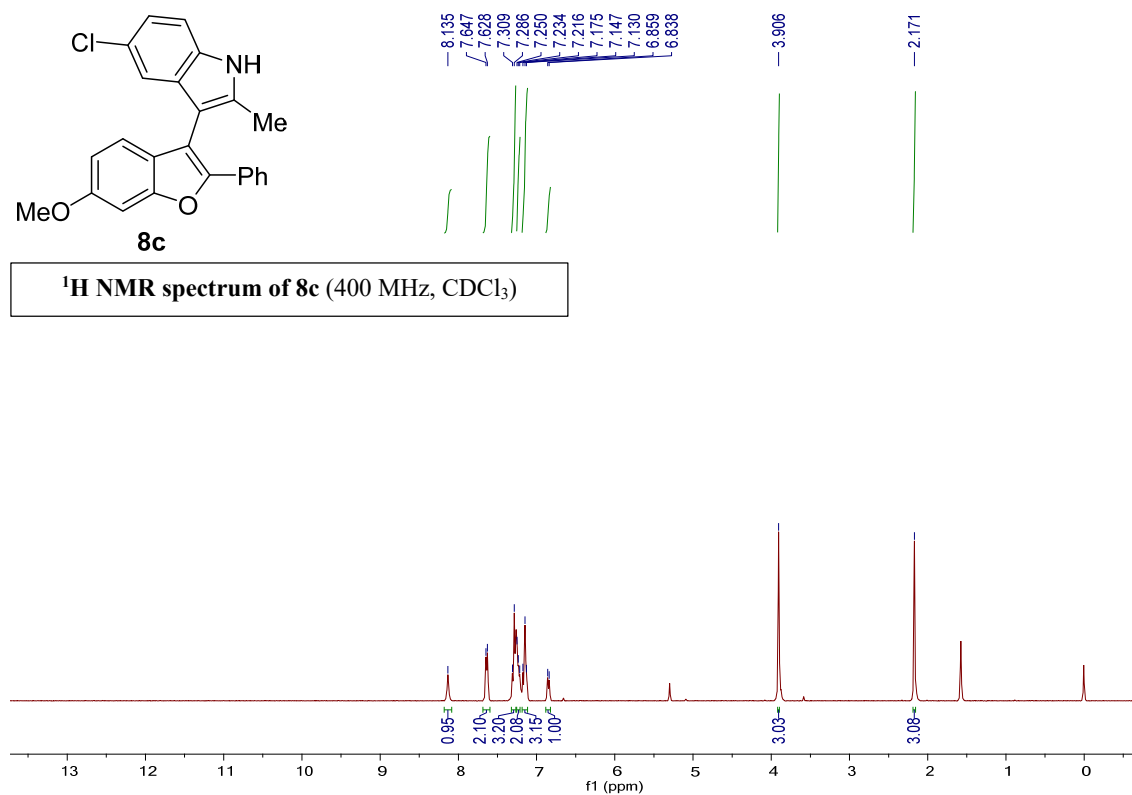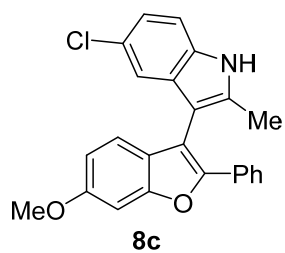

<sup>13</sup>C NMR spectrum of **8c** (100 MHz, CDCl<sub>3</sub>)

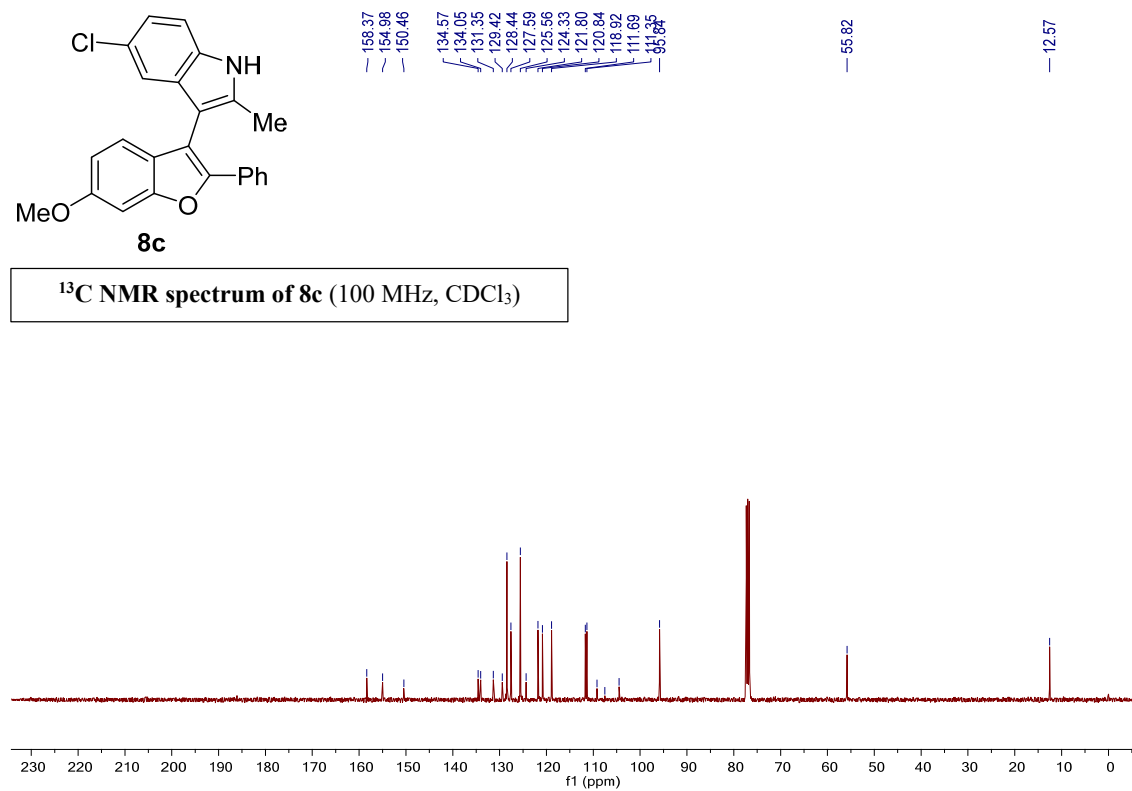

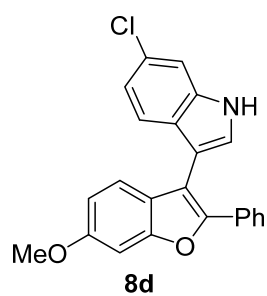

<sup>1</sup>H NMR spectrum of **8d** (400 MHz, CDCl<sub>3</sub>)

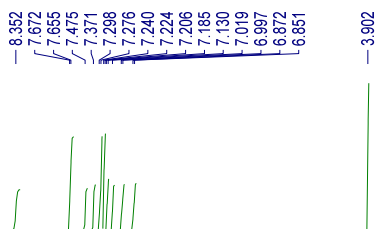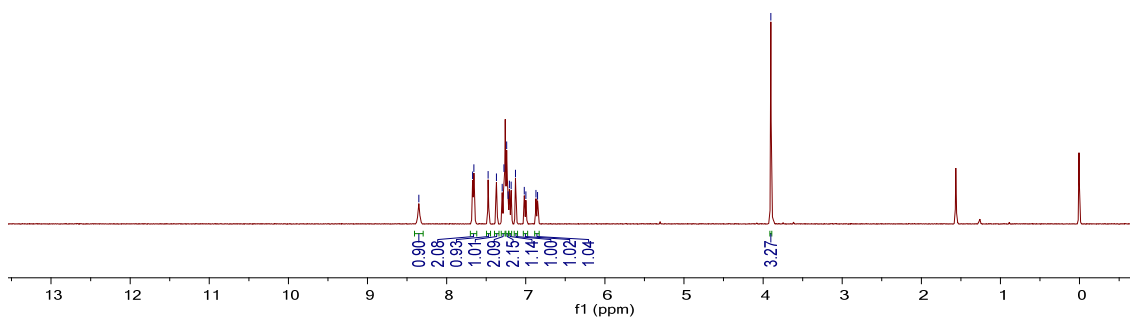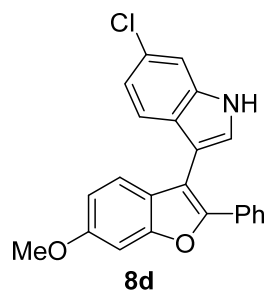

<sup>13</sup>C NMR spectrum of **8d** (100 MHz, CDCl<sub>3</sub>)

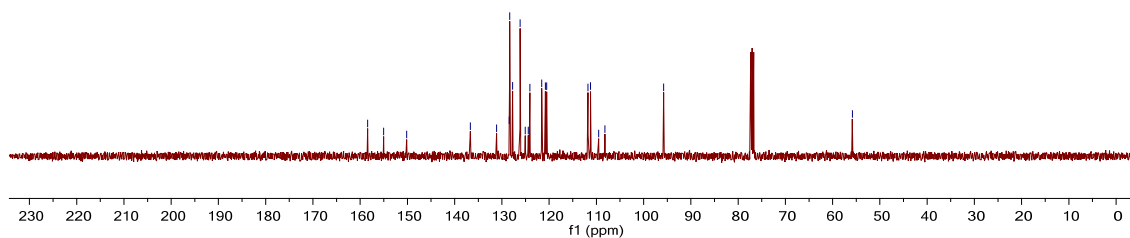

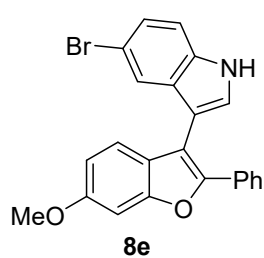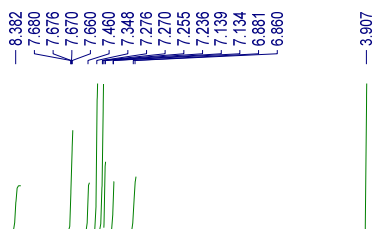

<sup>1</sup>H NMR spectrum of **8e** (400 MHz, CDCl<sub>3</sub>)

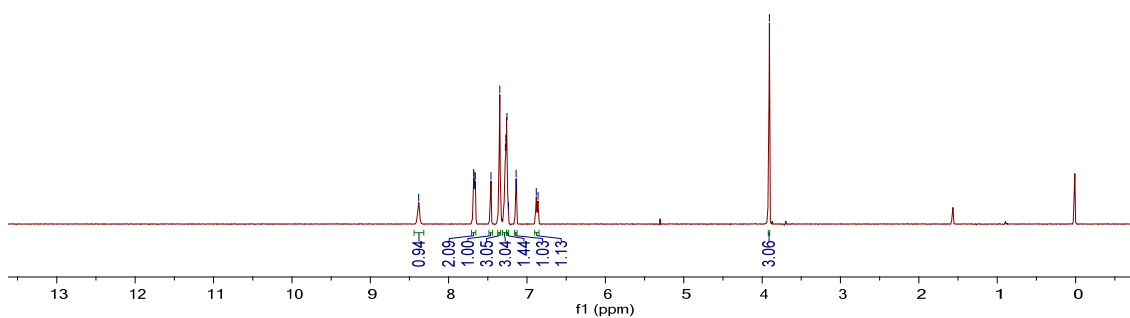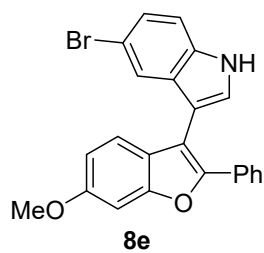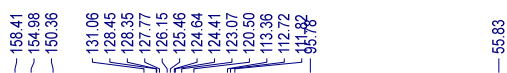

<sup>13</sup>C NMR spectrum of **8e** (100 MHz, CDCl<sub>3</sub>)

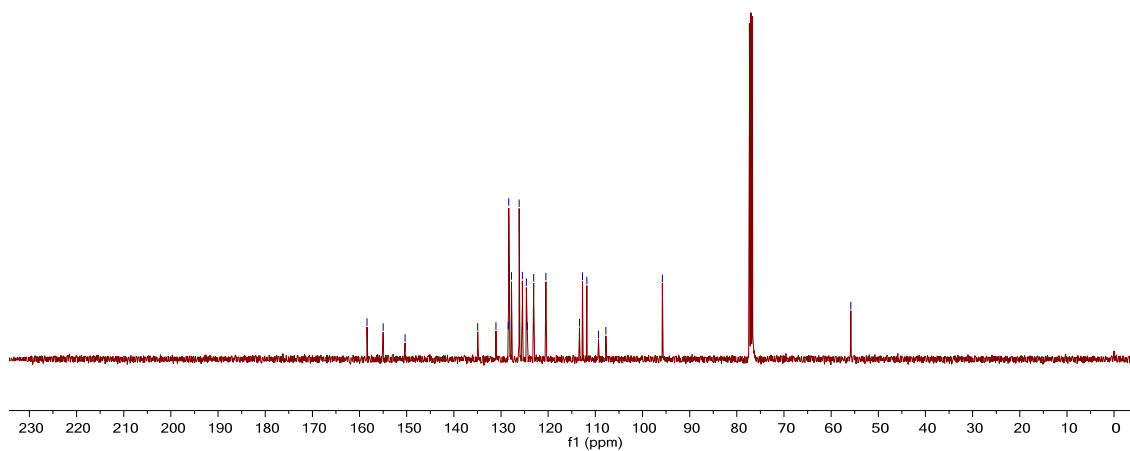

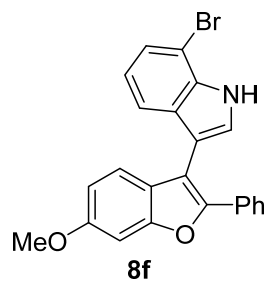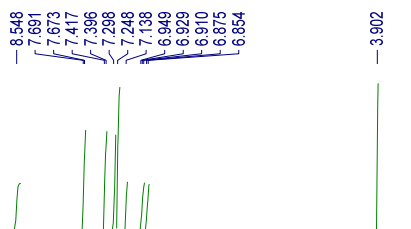

<sup>1</sup>H NMR spectrum of **8f** (400 MHz, CDCl<sub>3</sub>)

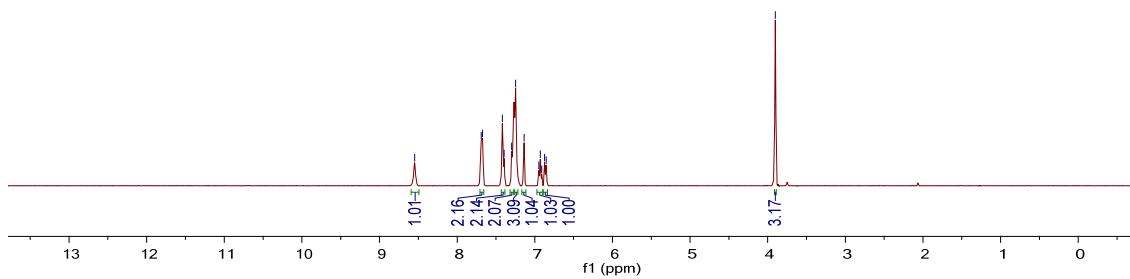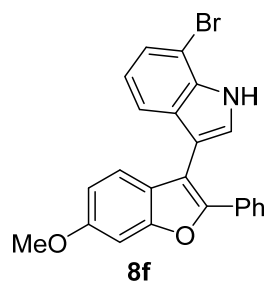

<sup>13</sup>C NMR spectrum of **8f** (100 MHz, CDCl<sub>3</sub>)

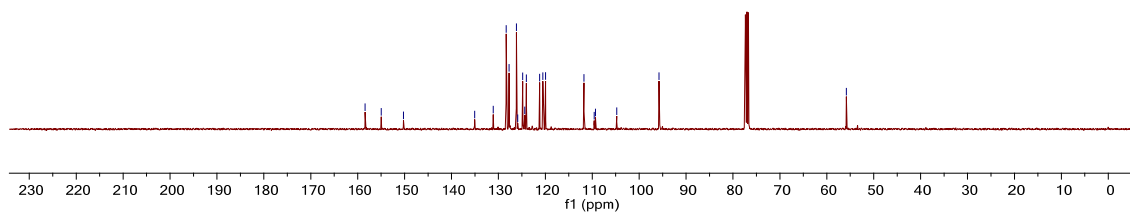

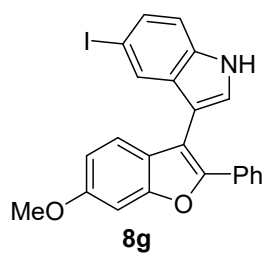

<sup>1</sup>H NMR spectrum of **8g** (400 MHz, CDCl<sub>3</sub>)

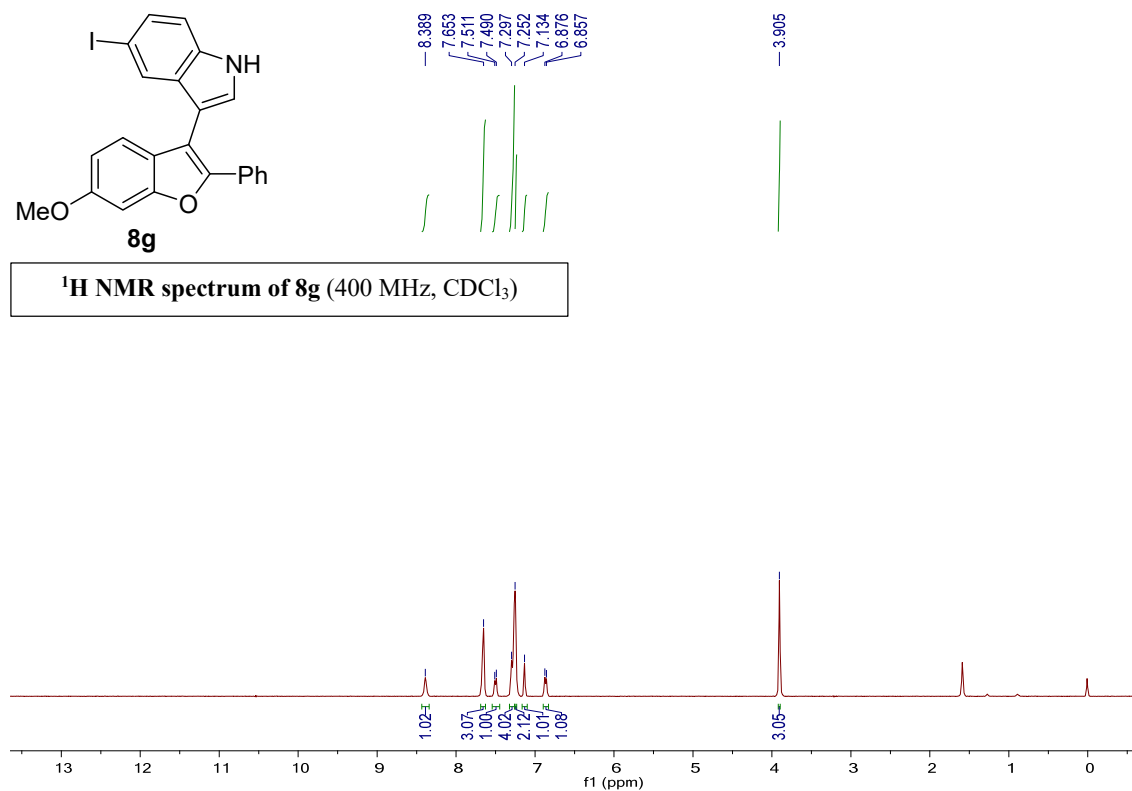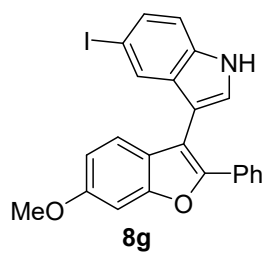

<sup>13</sup>C NMR spectrum of **8g** (100 MHz, CDCl<sub>3</sub>)

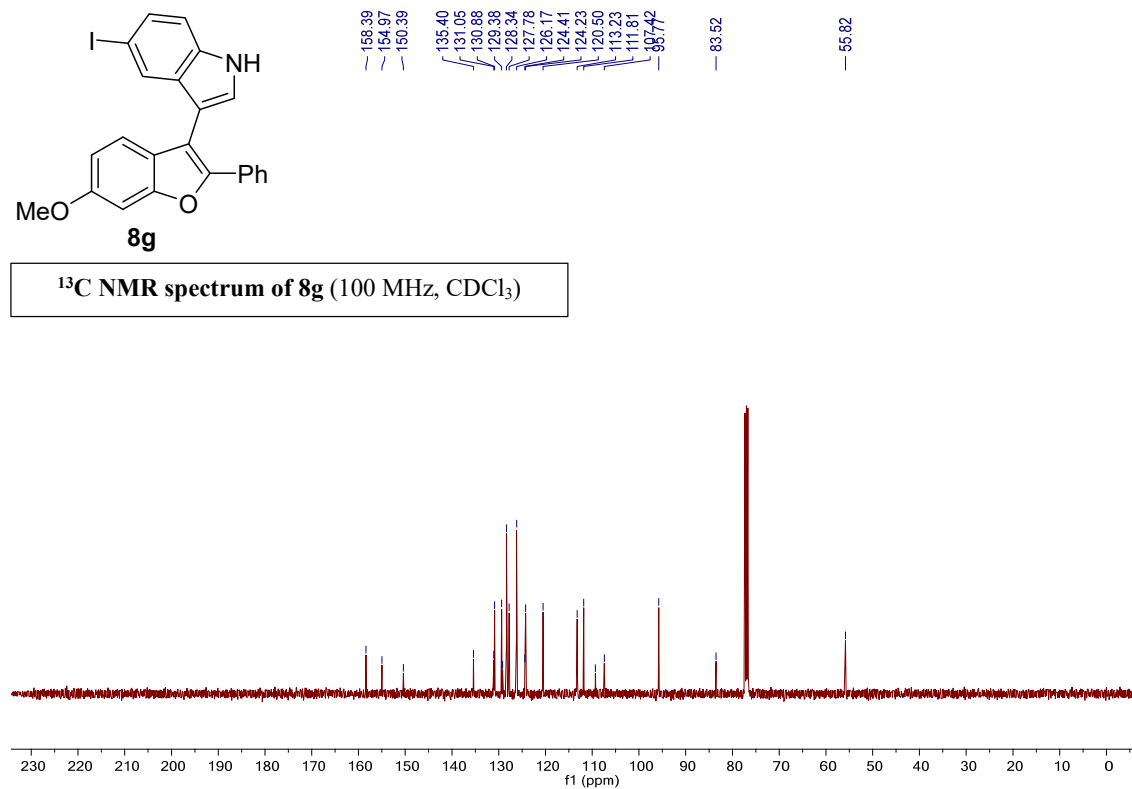

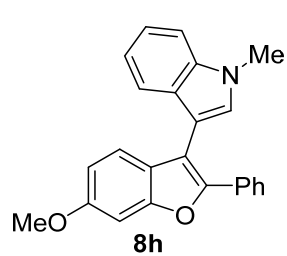

**<sup>1</sup>H NMR spectrum of 8h (400 MHz, CDCl<sub>3</sub>)**

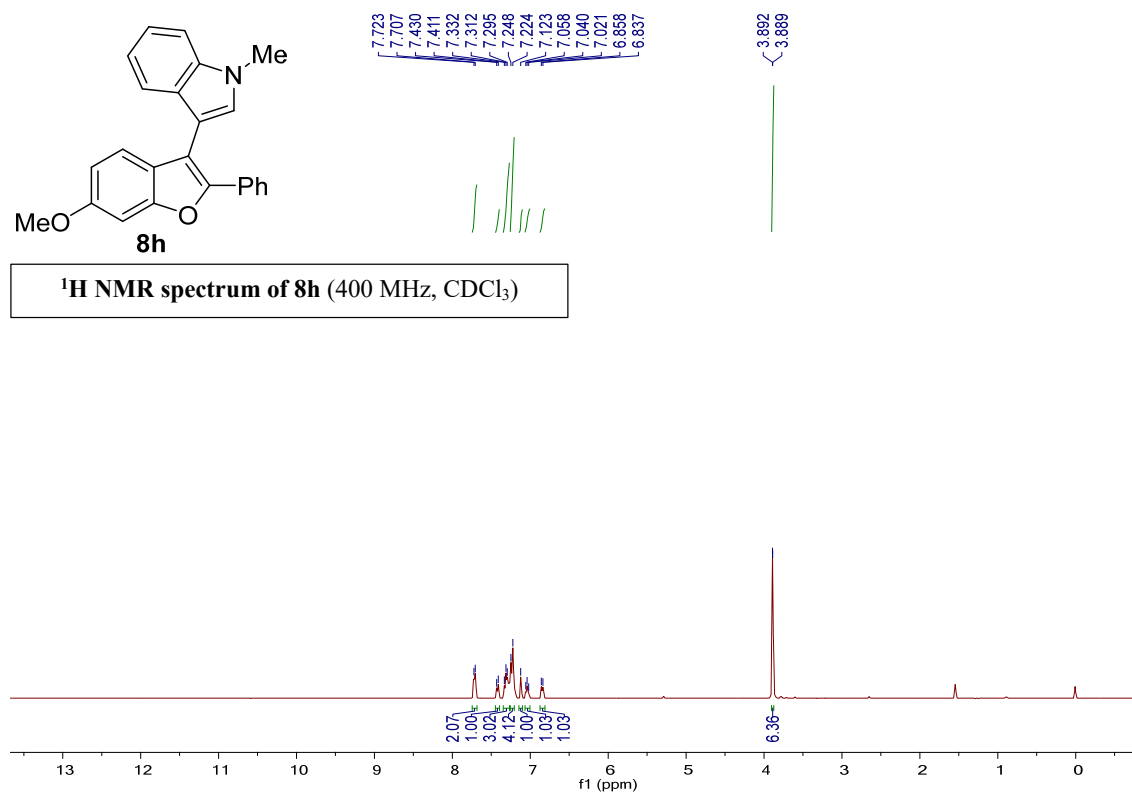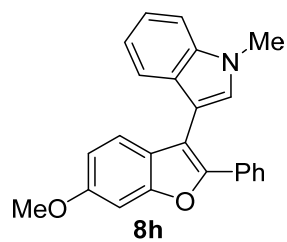

**<sup>13</sup>C NMR spectrum of 8h (100 MHz, CDCl<sub>3</sub>)**

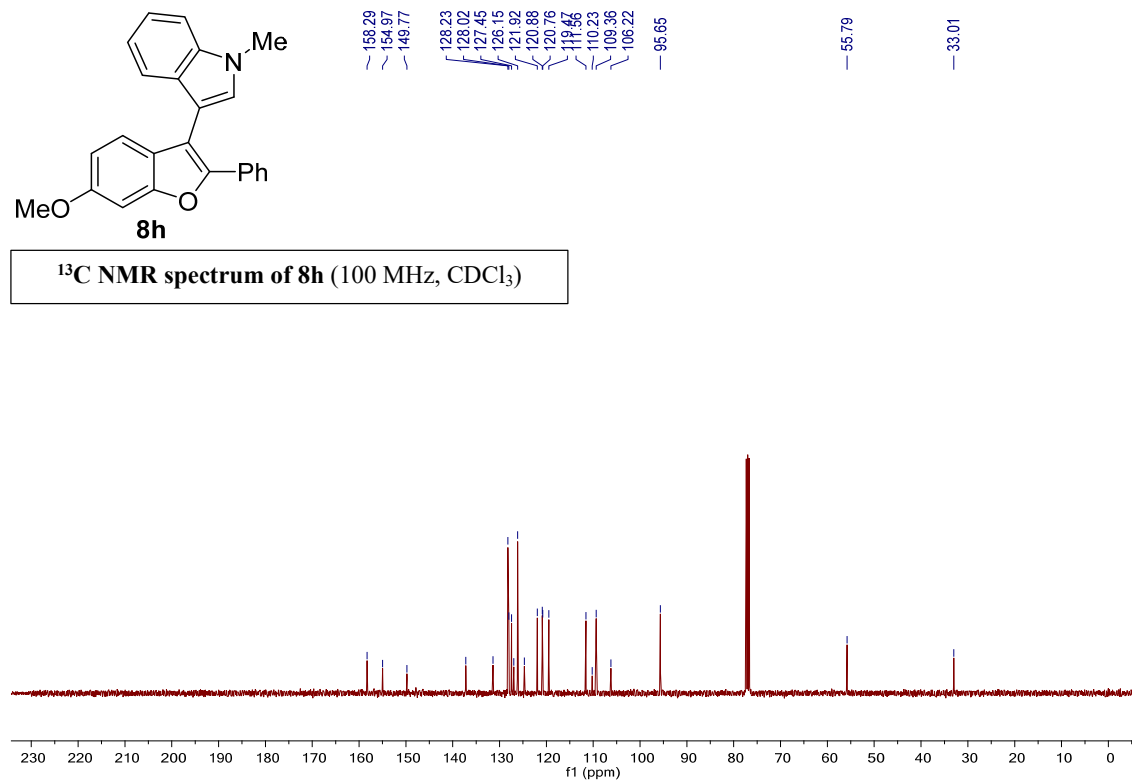

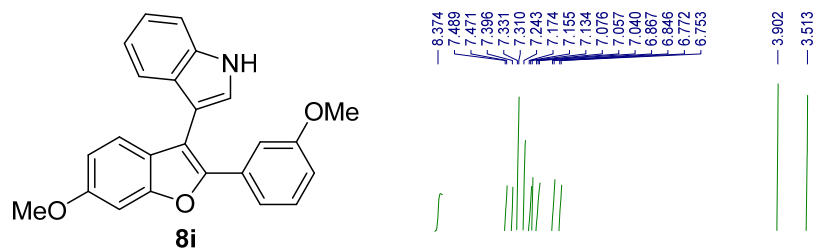

<sup>1</sup>H NMR spectrum of **8i** (400 MHz, CDCl<sub>3</sub>)

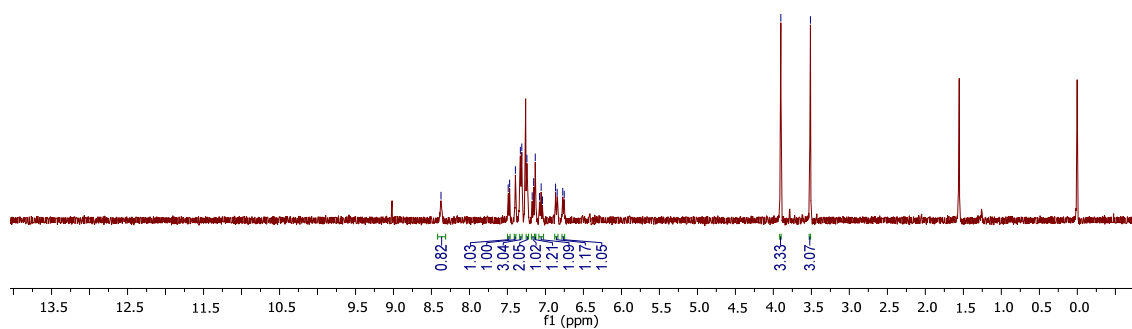

<sup>13</sup>C NMR spectrum of **8i** (100 MHz, CDCl<sub>3</sub>)

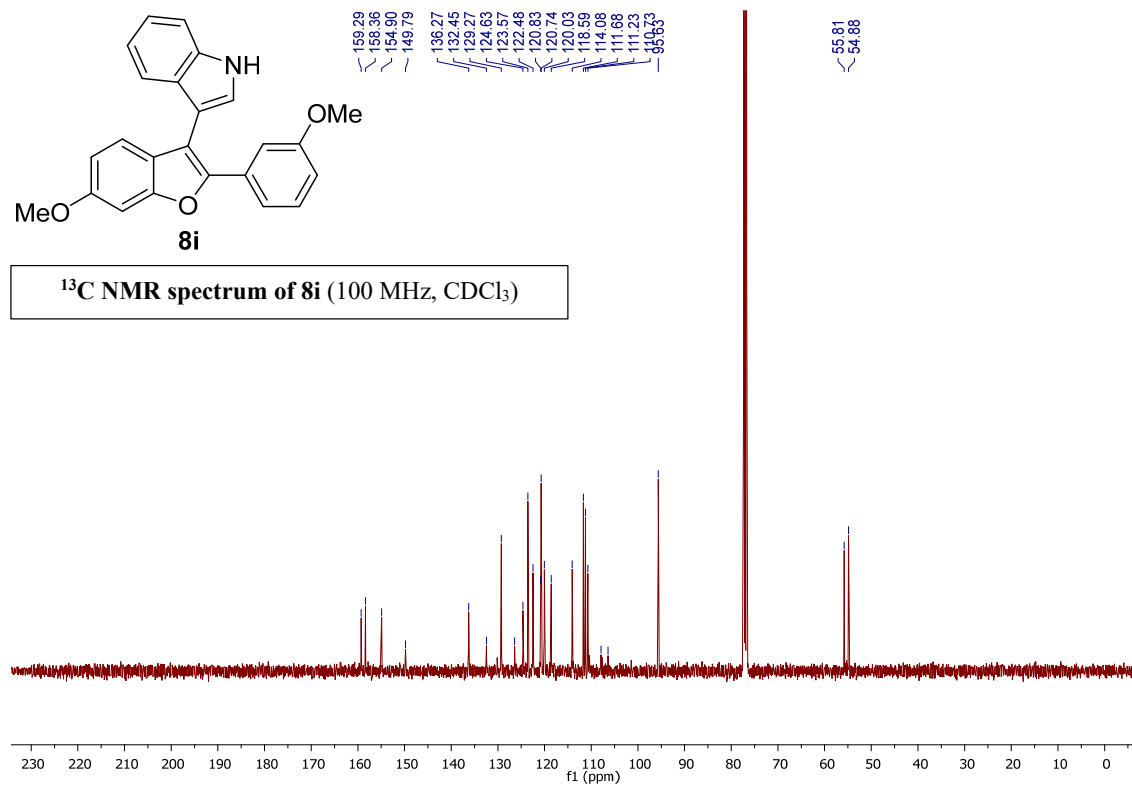

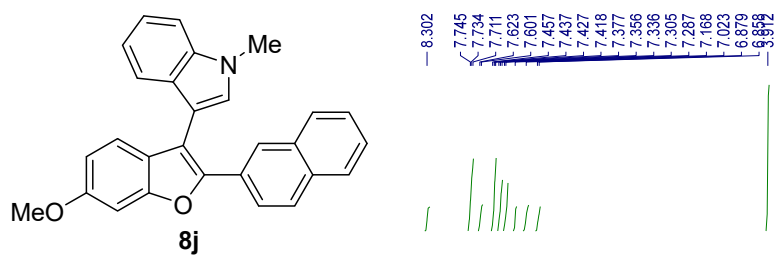

$^1\text{H}$  NMR spectrum of **8j** (400 MHz,  $\text{CDCl}_3$ )

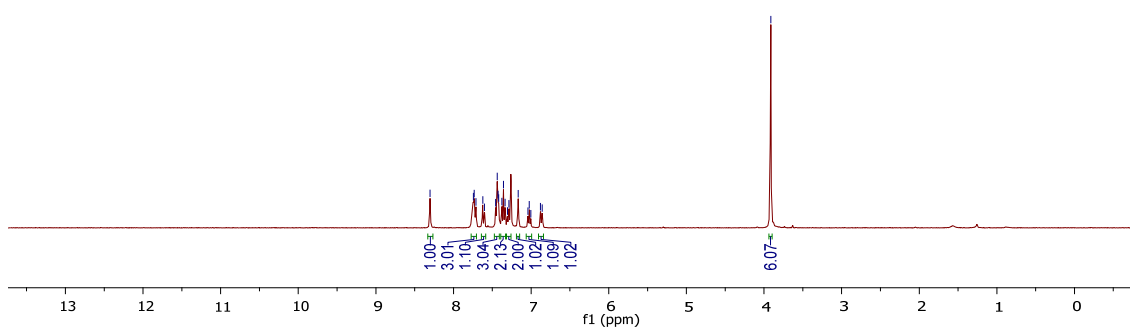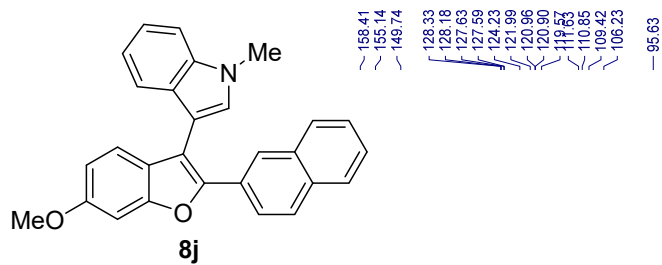

$^{13}\text{C}$  NMR spectrum of **8j** (100 MHz,  $\text{CDCl}_3$ )

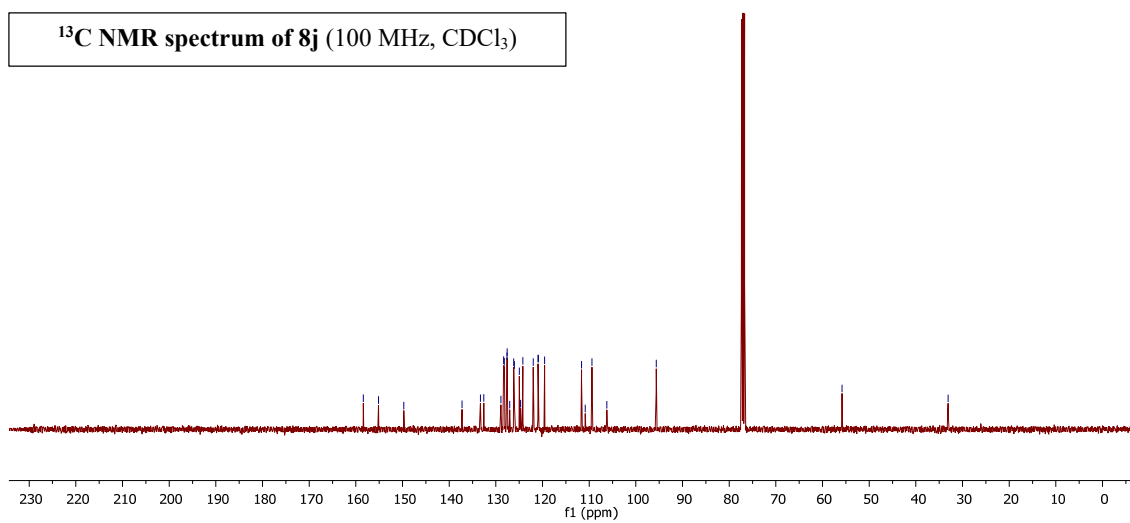



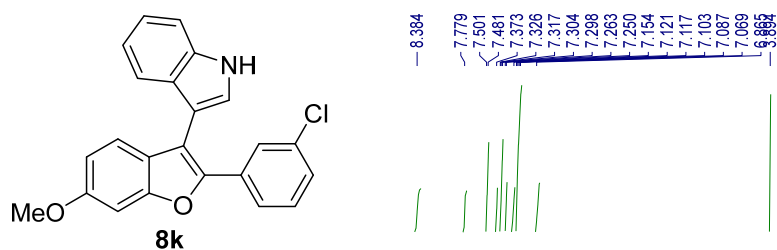

<sup>1</sup>H NMR spectrum of **8k** (400 MHz, CDCl<sub>3</sub>)

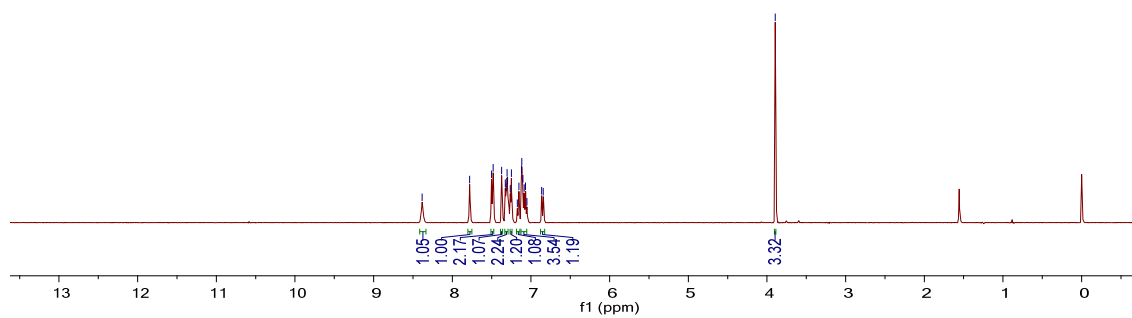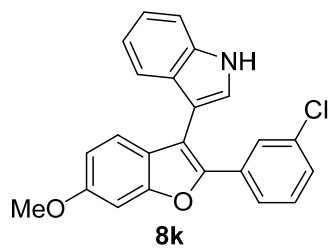

<sup>13</sup>C NMR spectrum of **8k** (100 MHz, CDCl<sub>3</sub>)

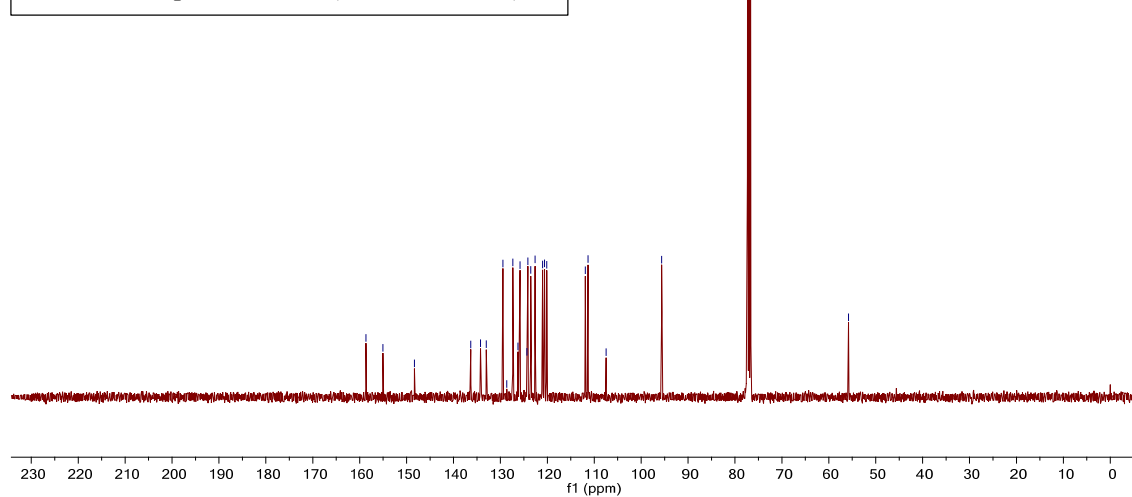

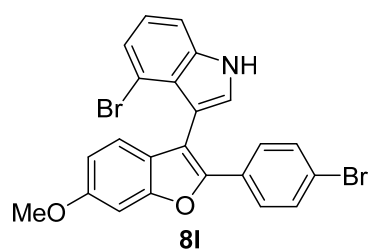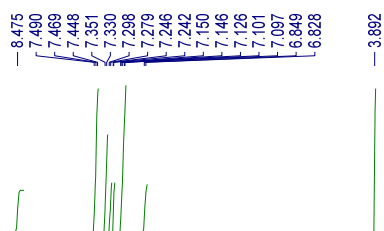

$^1\text{H}$  NMR spectrum of **8I** (400 MHz,  $\text{CDCl}_3$ )

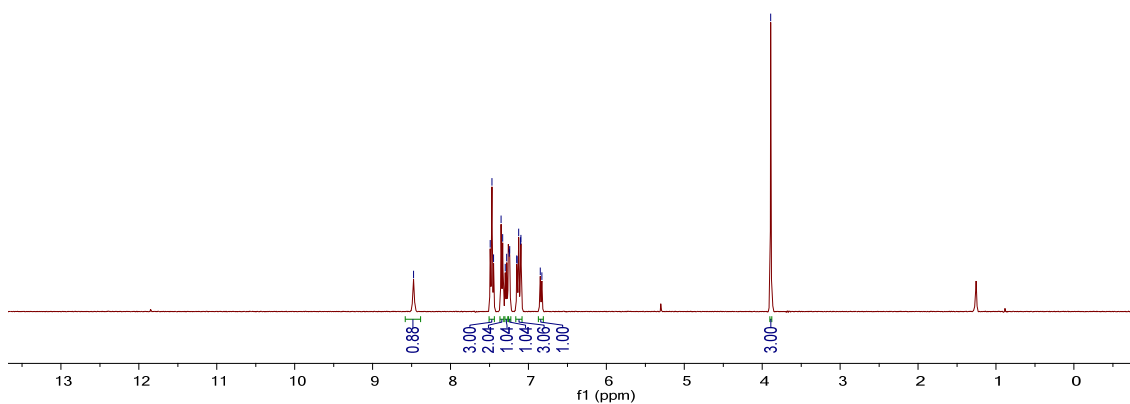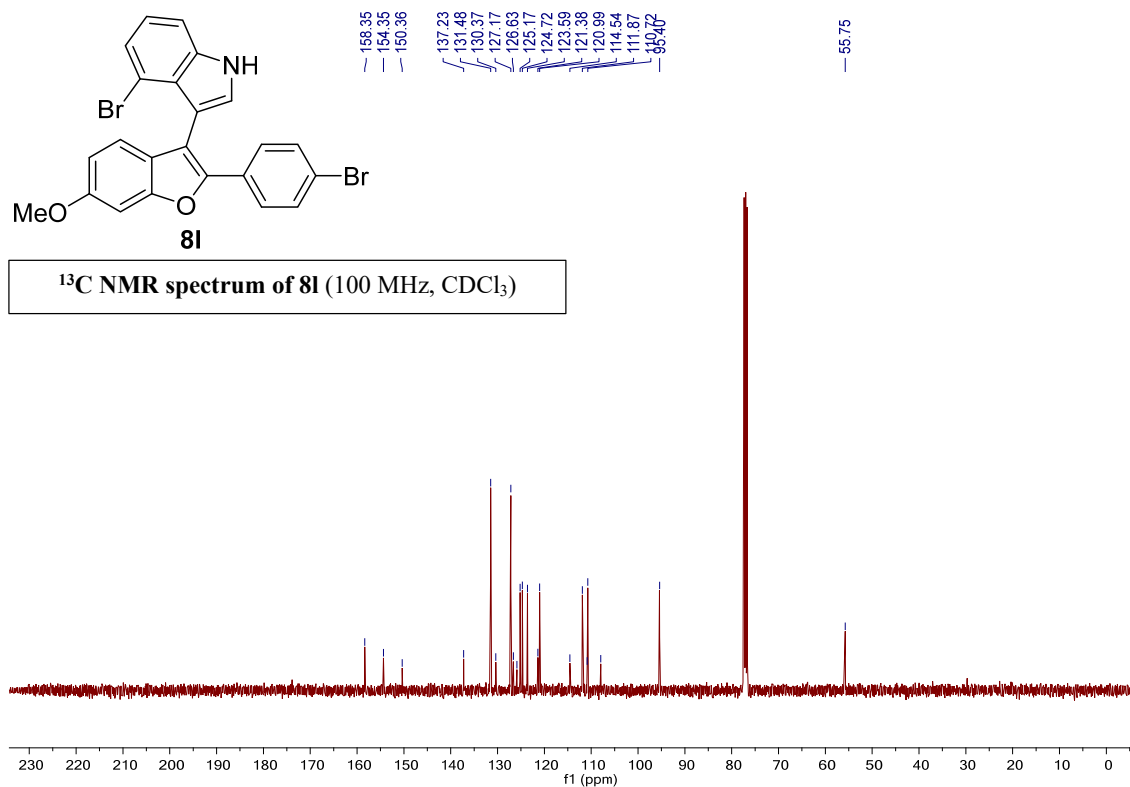

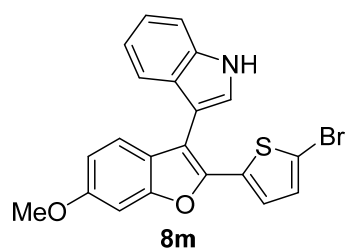

<sup>1</sup>H NMR spectrum of **8m** (400 MHz, CDCl<sub>3</sub>)

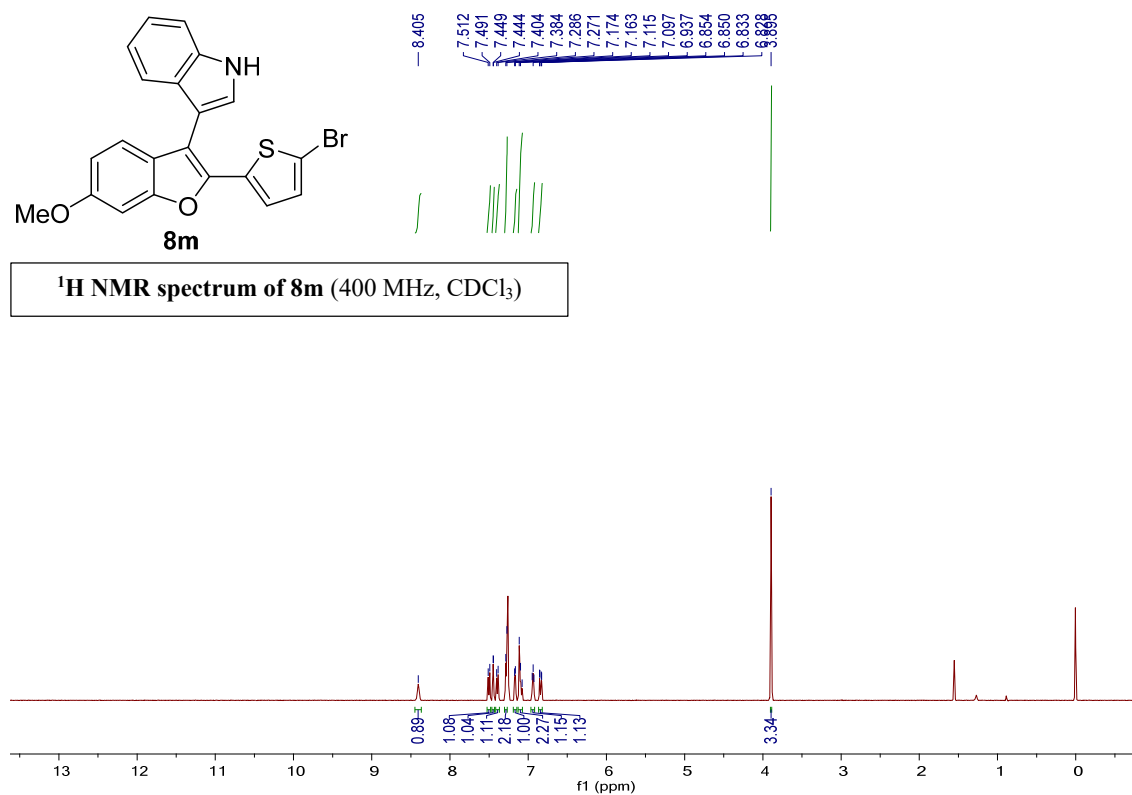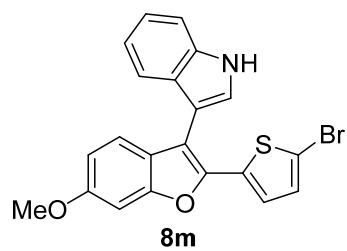

<sup>13</sup>C NMR spectrum of **8m** (100 MHz, CDCl<sub>3</sub>)

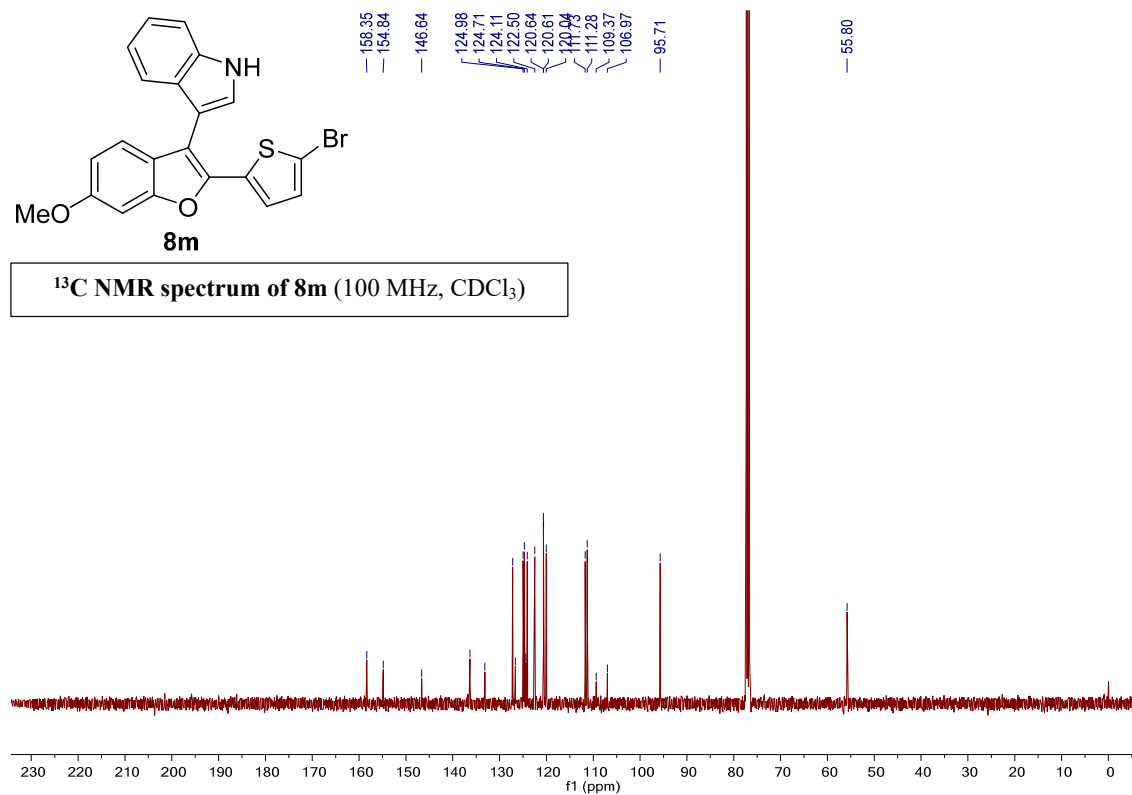

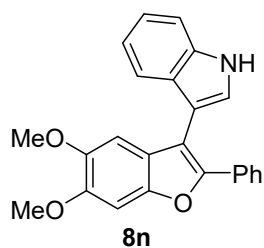

<sup>1</sup>H NMR spectrum of **8n** (400 MHz, CDCl<sub>3</sub>)

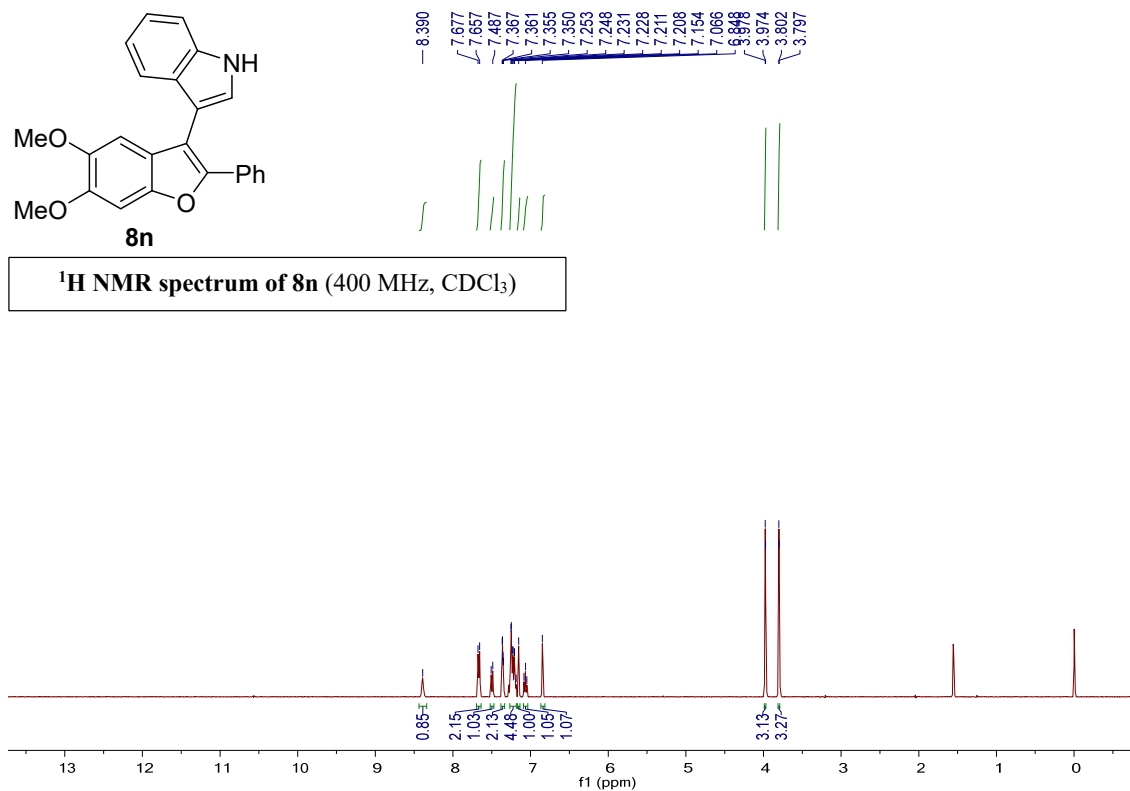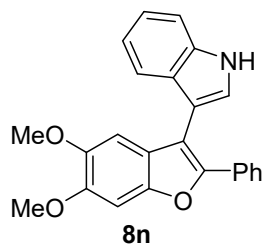

<sup>13</sup>C NMR spectrum of **8n** (100 MHz, CDCl<sub>3</sub>)

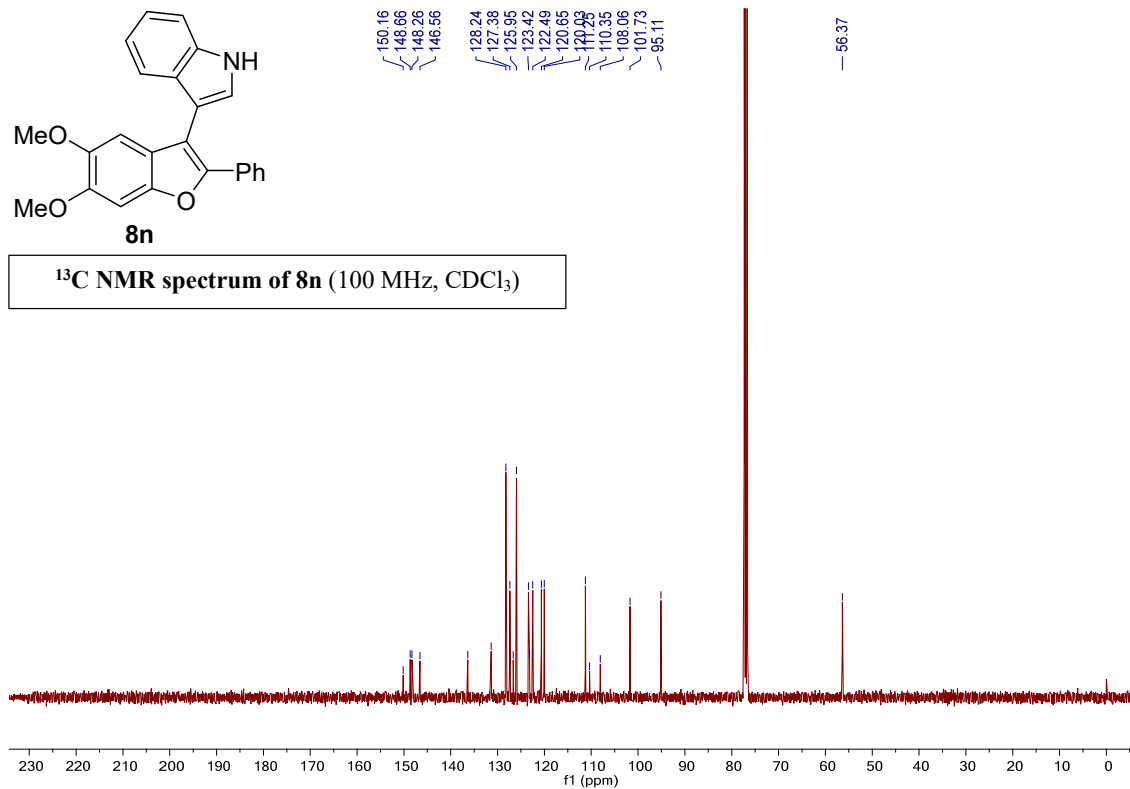

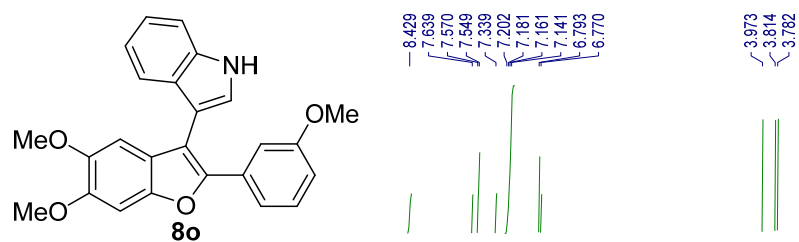

<sup>1</sup>H NMR spectrum of **8o** (400 MHz, CDCl<sub>3</sub>)

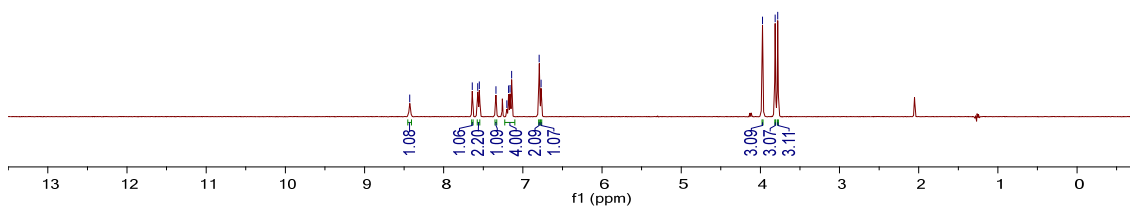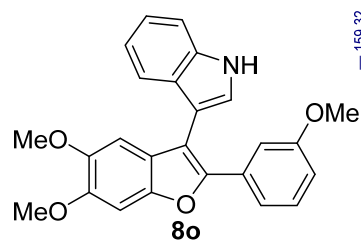

<sup>13</sup>C NMR spectrum of **8o** (100 MHz, CDCl<sub>3</sub>)

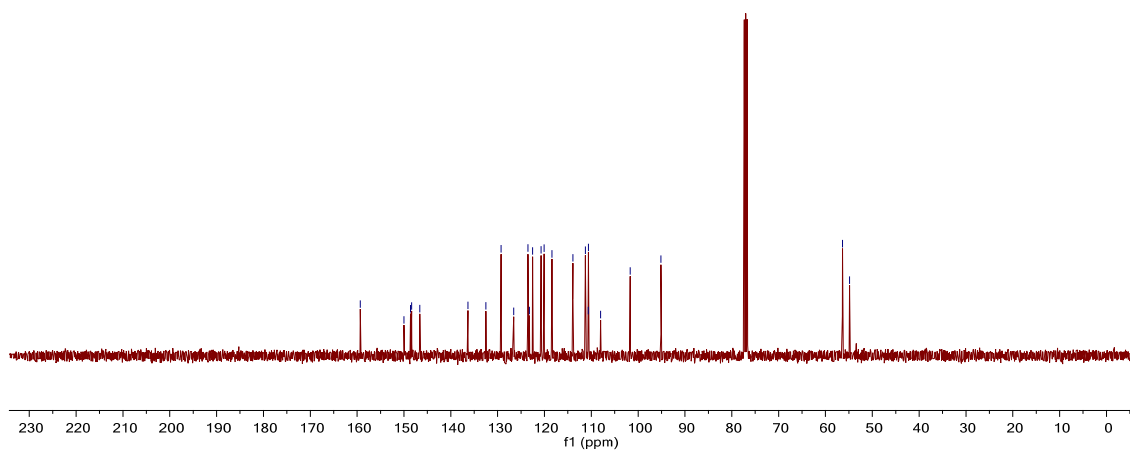

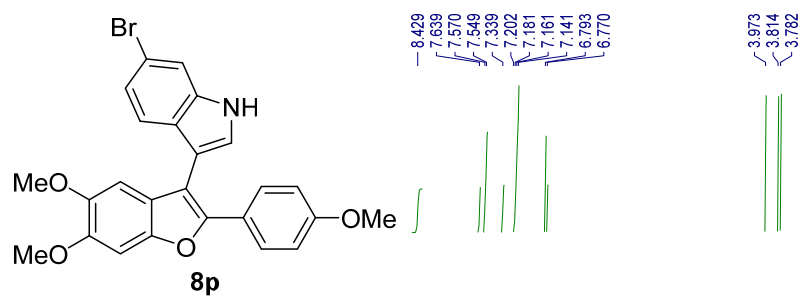

<sup>1</sup>H NMR spectrum of **8p** (400 MHz, CDCl<sub>3</sub>)

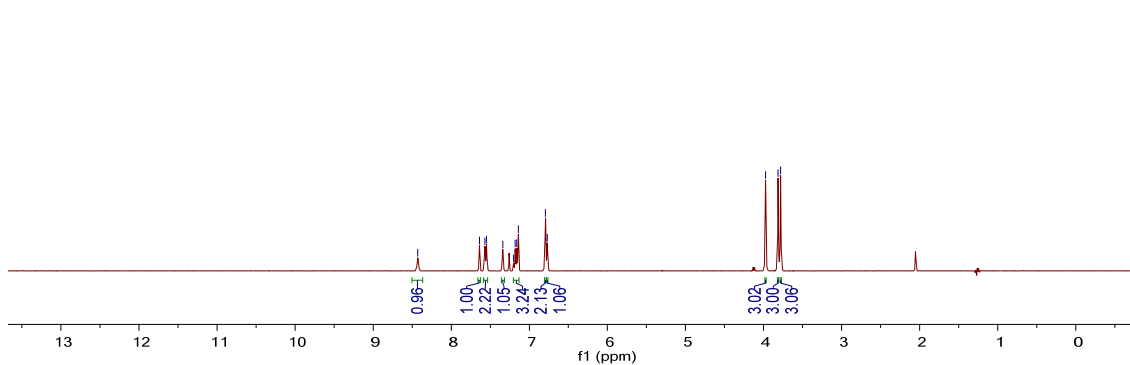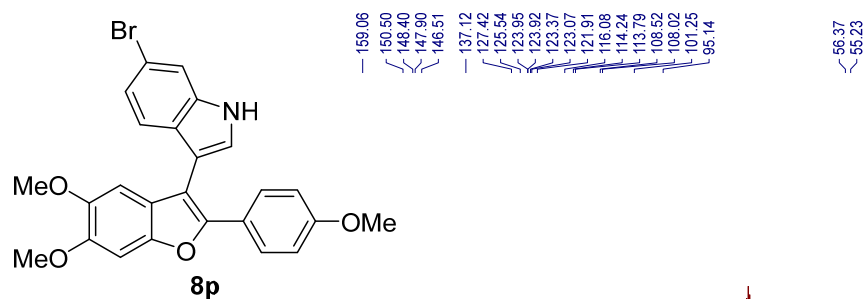

<sup>13</sup>C NMR spectrum of **8p** (100 MHz, CDCl<sub>3</sub>)

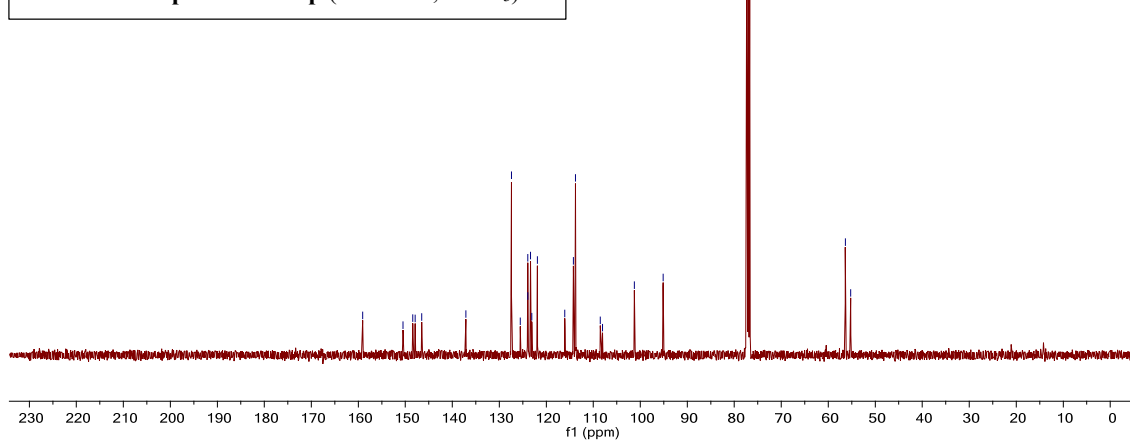

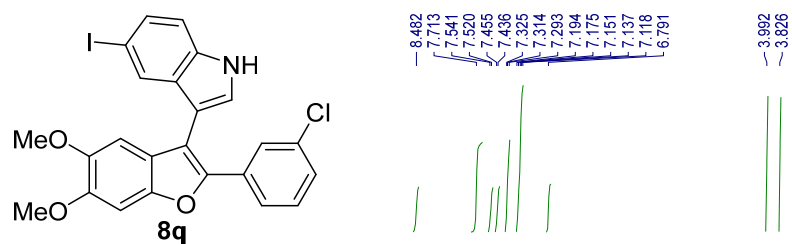

<sup>1</sup>H NMR spectrum of **8q** (400 MHz, CDCl<sub>3</sub>)

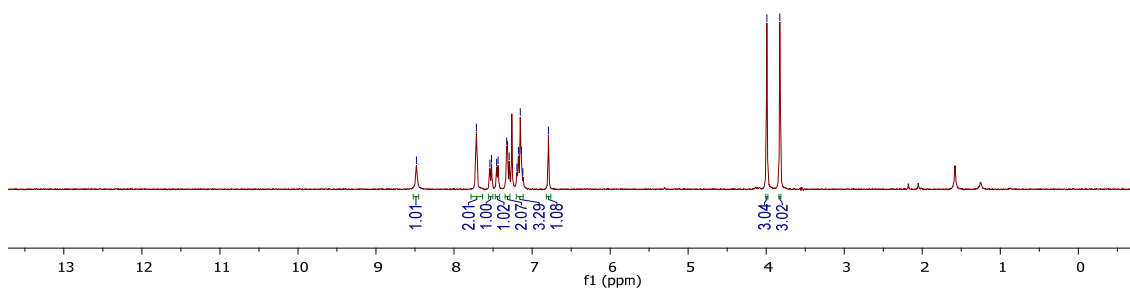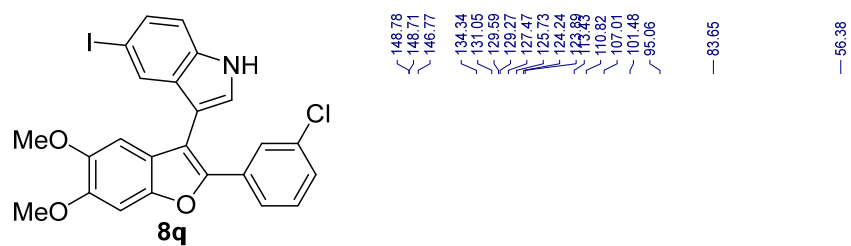

<sup>13</sup>C NMR spectrum of **8q** (100 MHz, CDCl<sub>3</sub>)

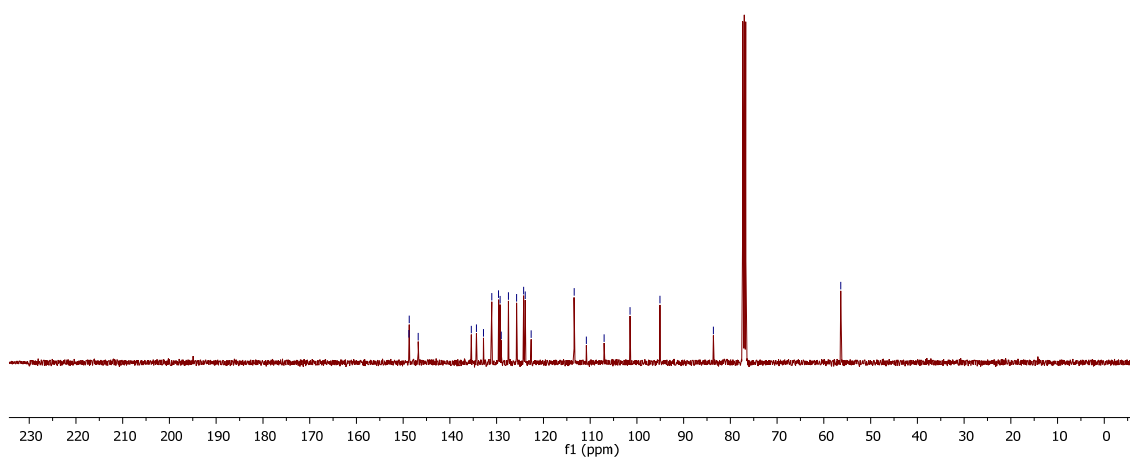

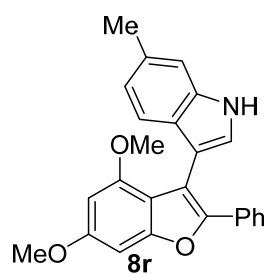

<sup>1</sup>H NMR spectrum of **8r** (400 MHz, CDCl<sub>3</sub>)

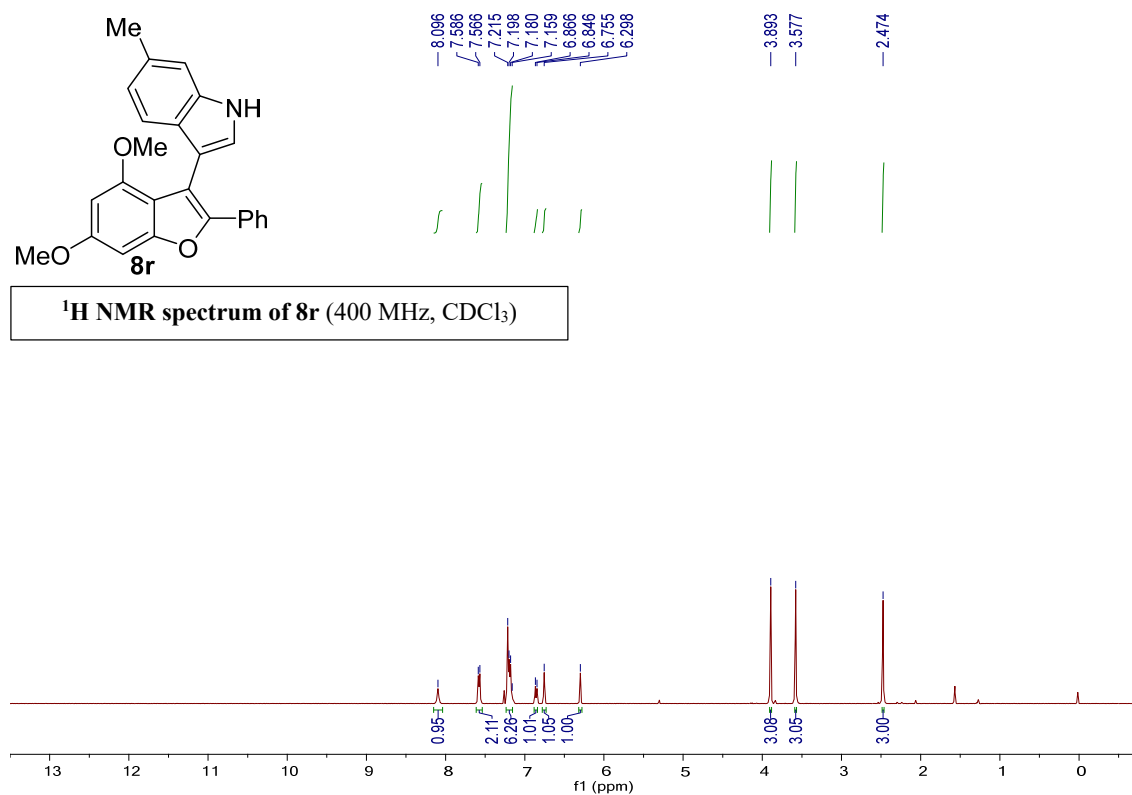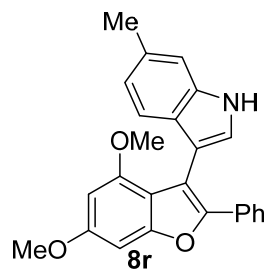

<sup>13</sup>C NMR spectrum of **8r** (100 MHz, CDCl<sub>3</sub>)

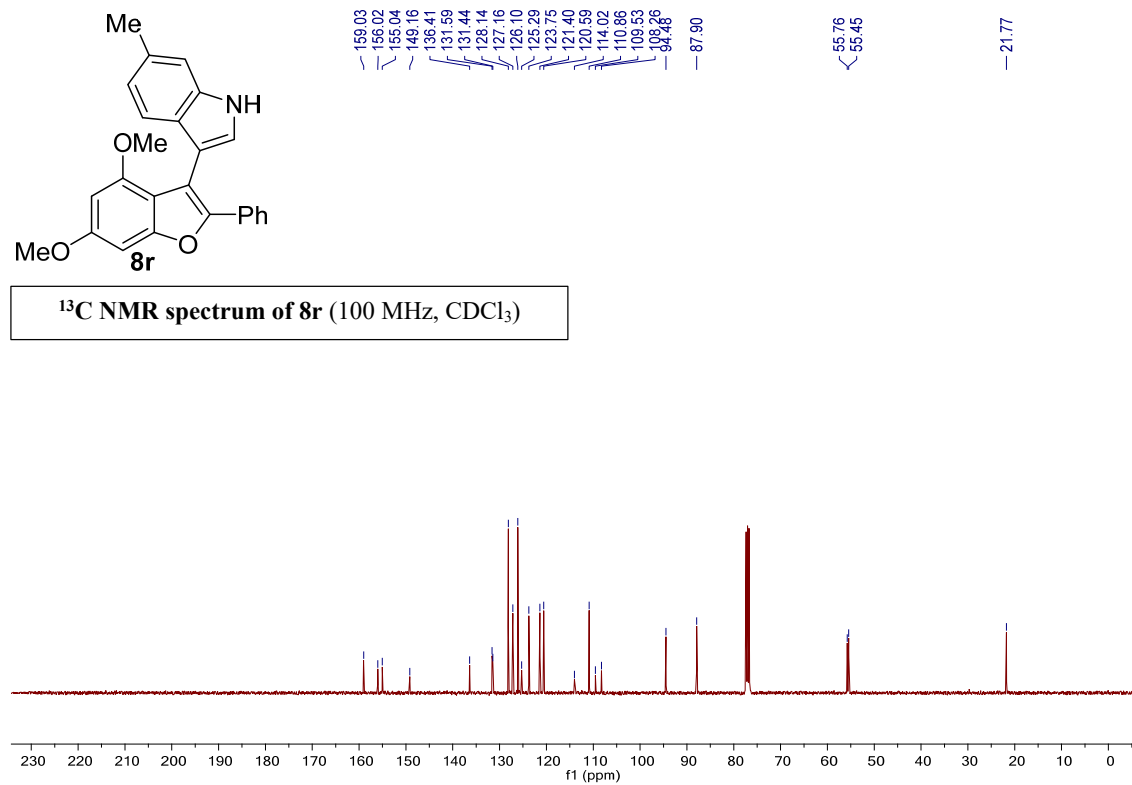



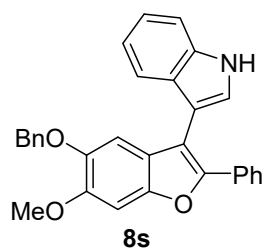

<sup>1</sup>H NMR spectrum of **8s** (400 MHz, CDCl<sub>3</sub>)

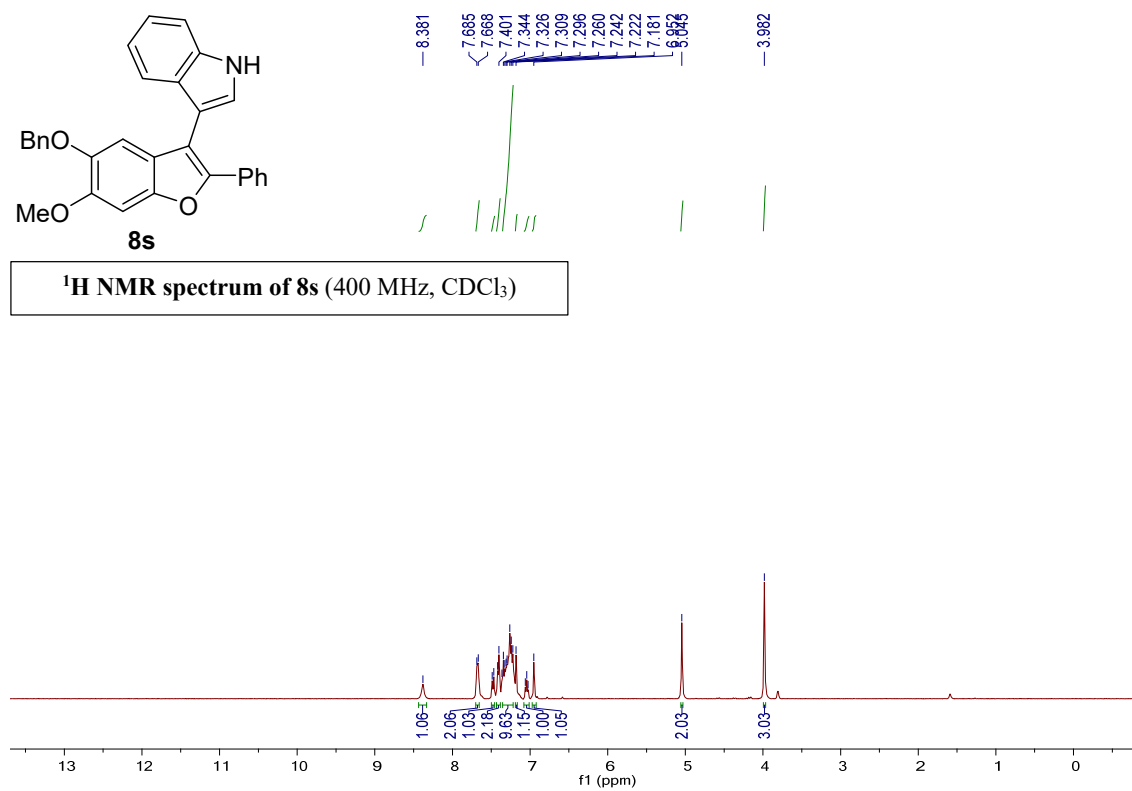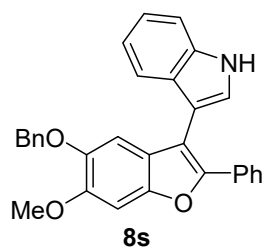

<sup>13</sup>C NMR spectrum of **8s** (100 MHz, CDCl<sub>3</sub>)

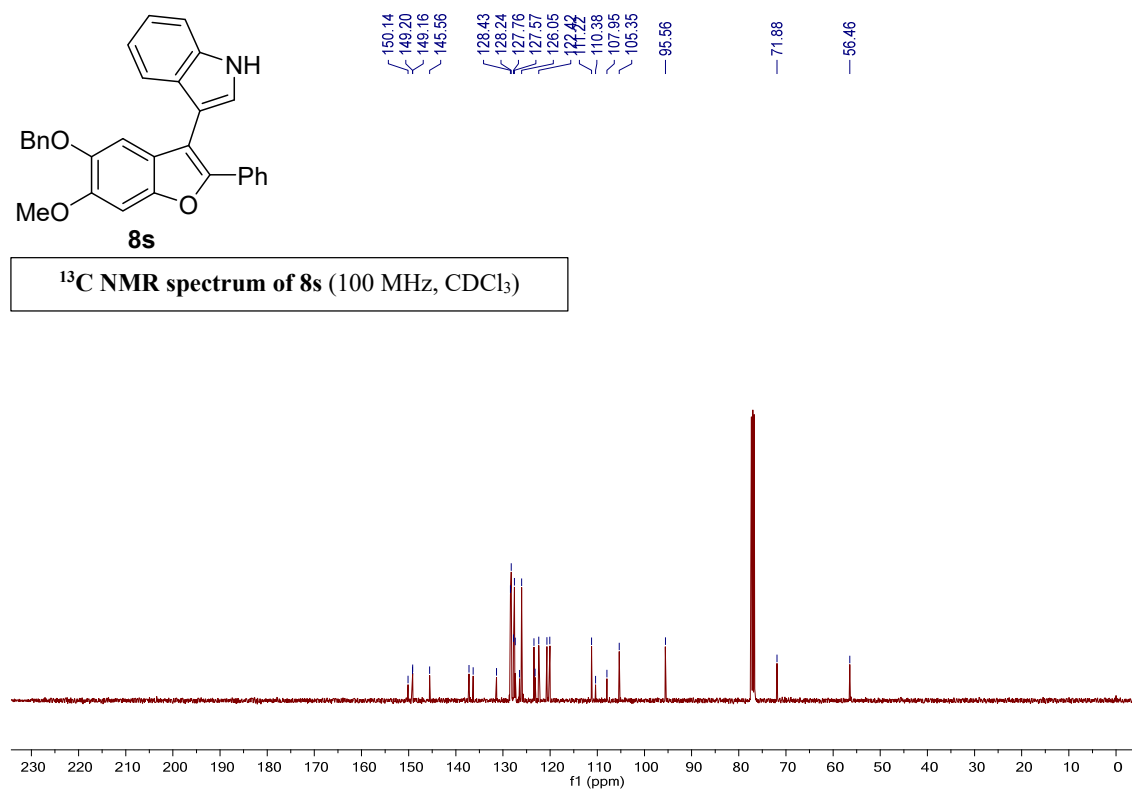

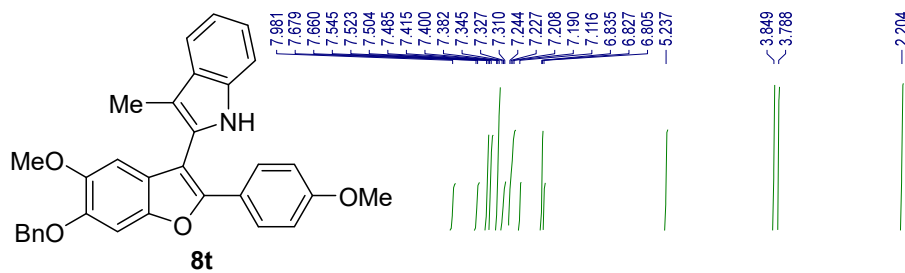

<sup>1</sup>H NMR spectrum of **8t** (400 MHz, CDCl<sub>3</sub>)

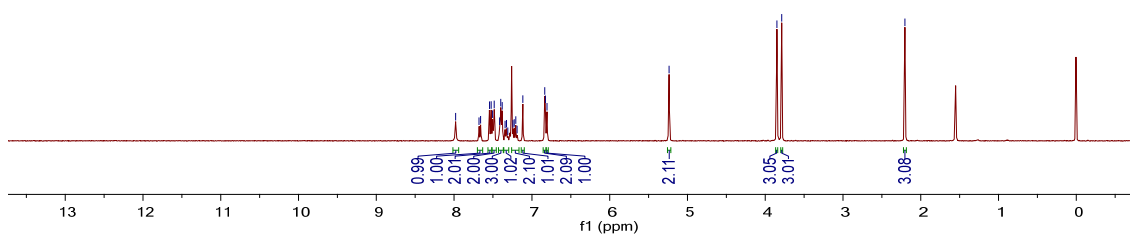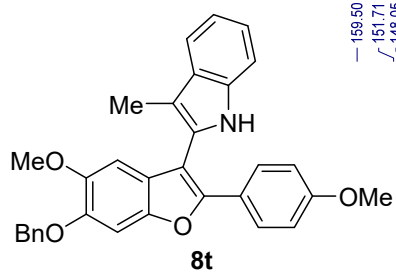

<sup>13</sup>C NMR spectrum of **8t** (100 MHz, CDCl<sub>3</sub>)

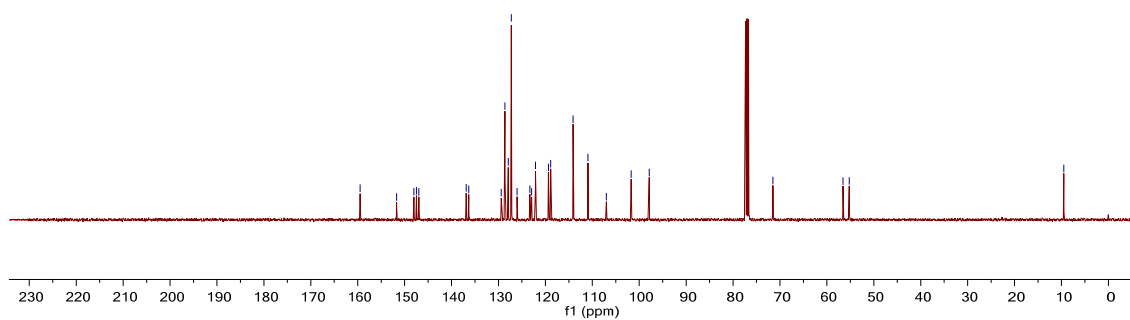

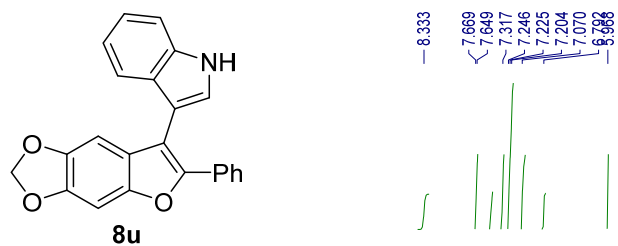

<sup>1</sup>H NMR spectrum of **8u** (400 MHz, CDCl<sub>3</sub>)

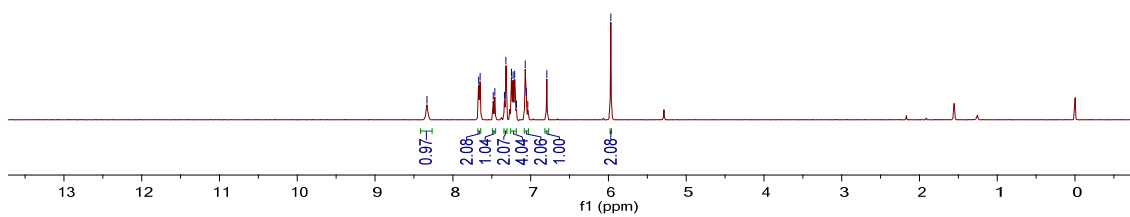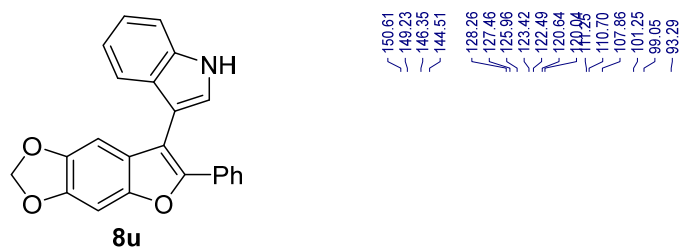

<sup>13</sup>C NMR spectrum of **8u** (100 MHz, CDCl<sub>3</sub>)

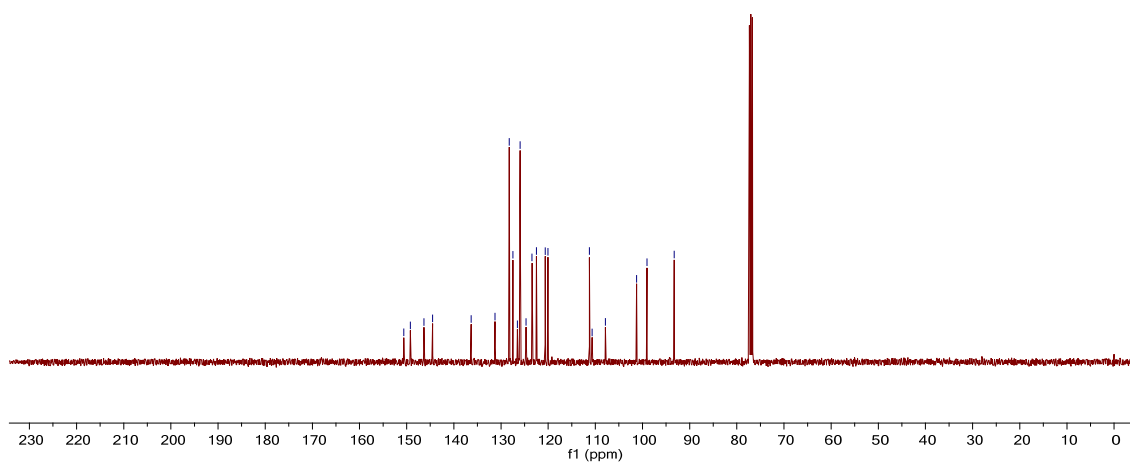

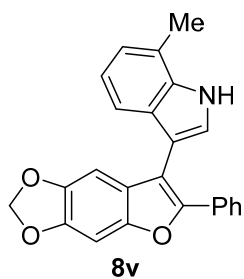

<sup>1</sup>H NMR spectrum of **8v** (400 MHz, CDCl<sub>3</sub>)

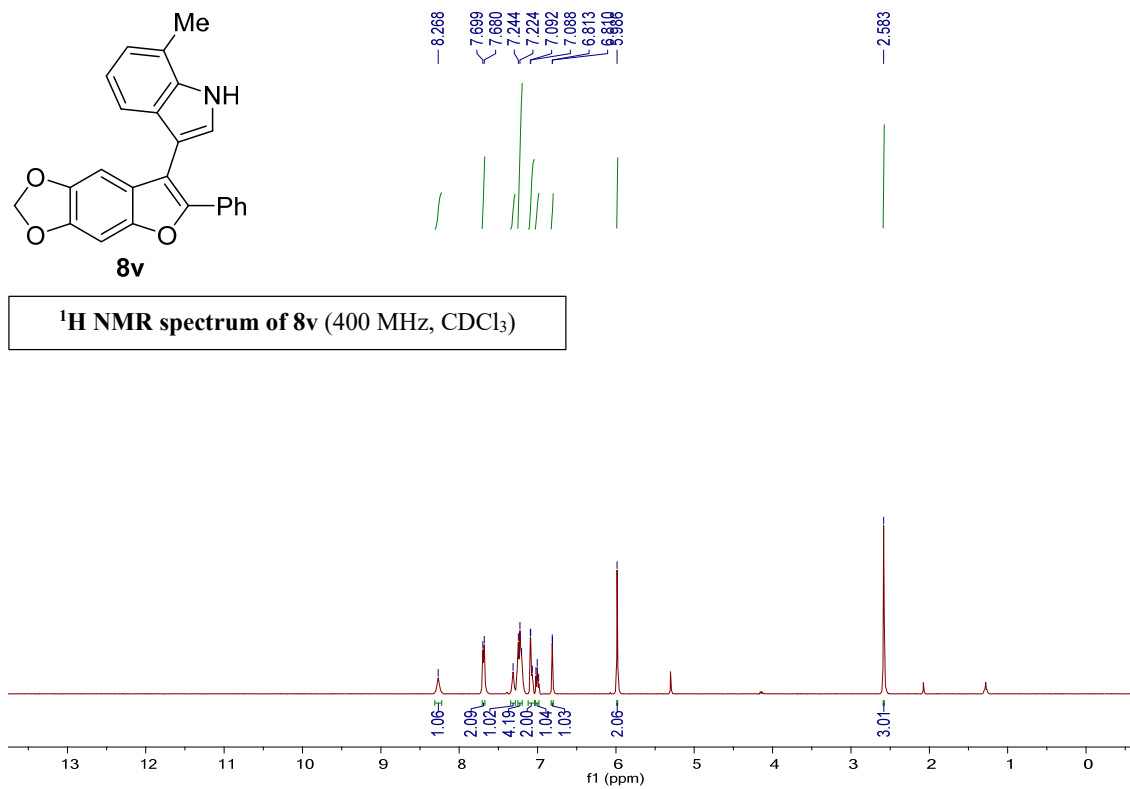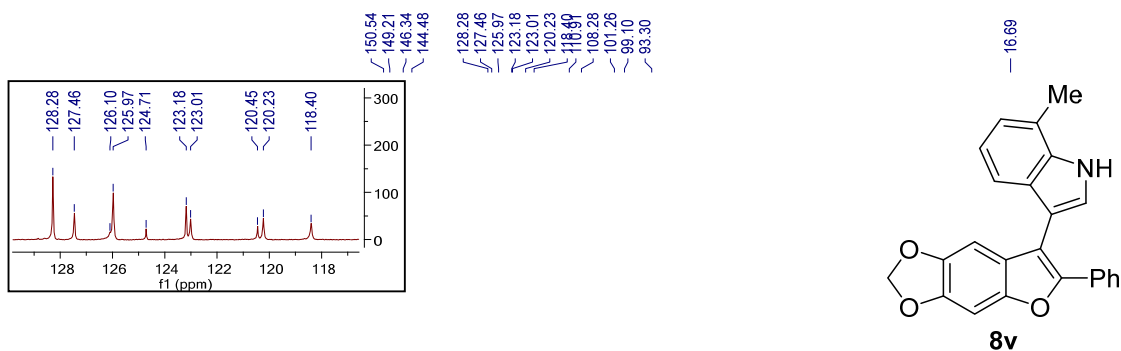

<sup>13</sup>C NMR spectrum of **8v** (100 MHz, CDCl<sub>3</sub>)

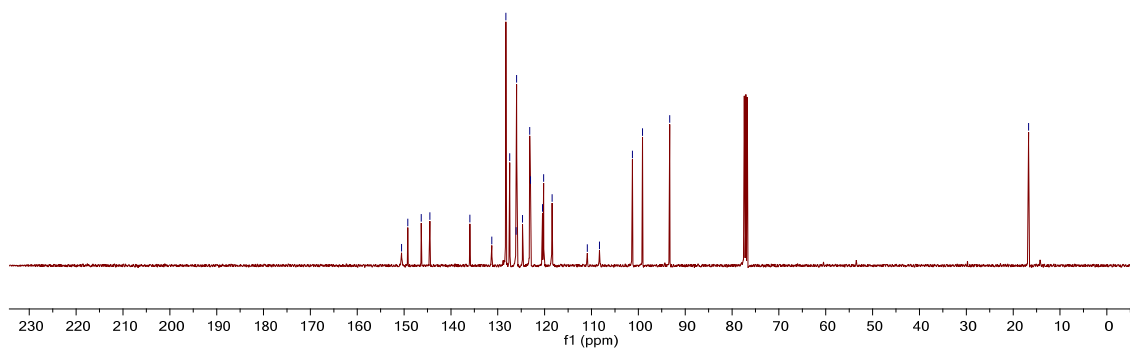

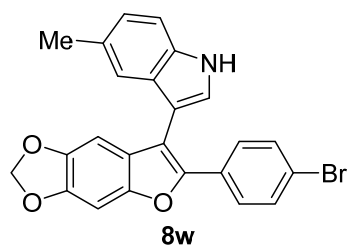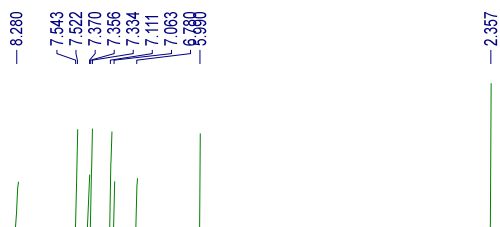

<sup>1</sup>H NMR spectrum of **8w** (400 MHz, CDCl<sub>3</sub>)

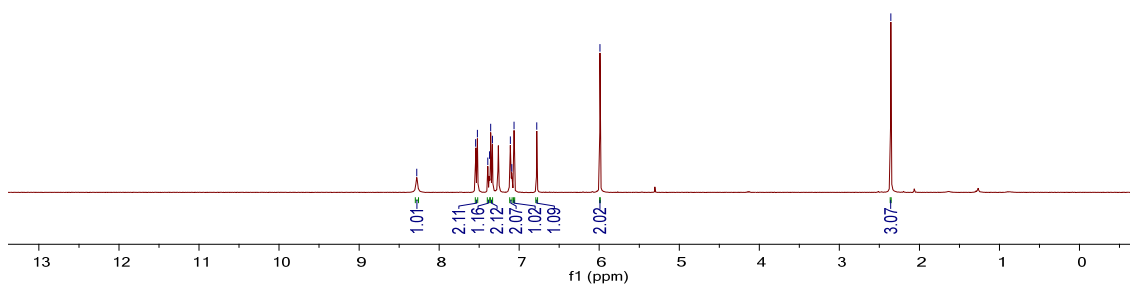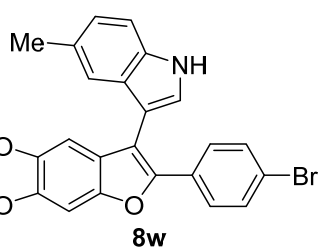

<sup>13</sup>C NMR spectrum of **8w** (100 MHz, CDCl<sub>3</sub>)

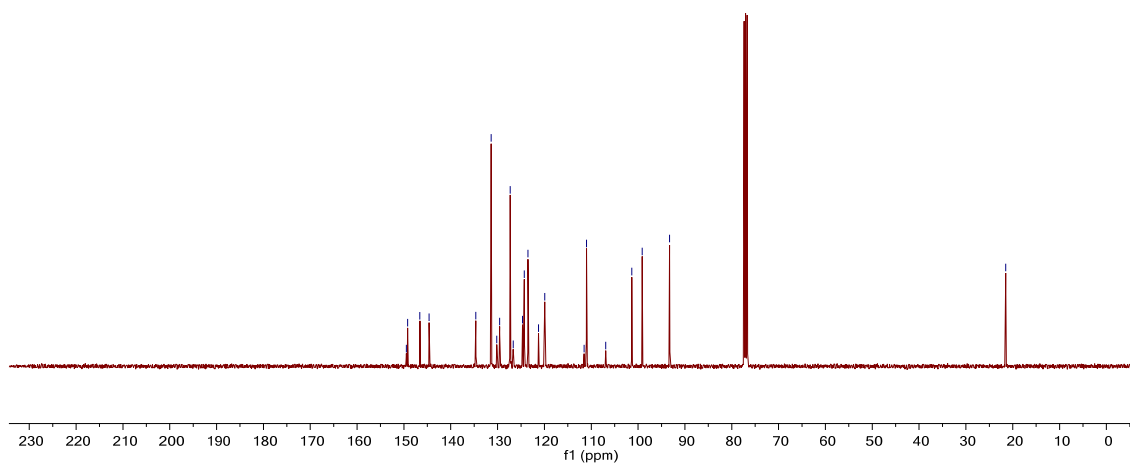

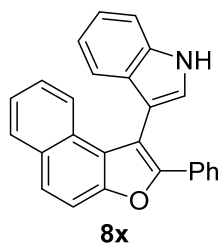

<sup>1</sup>H NMR spectrum of **8x** (400 MHz, CDCl<sub>3</sub>)

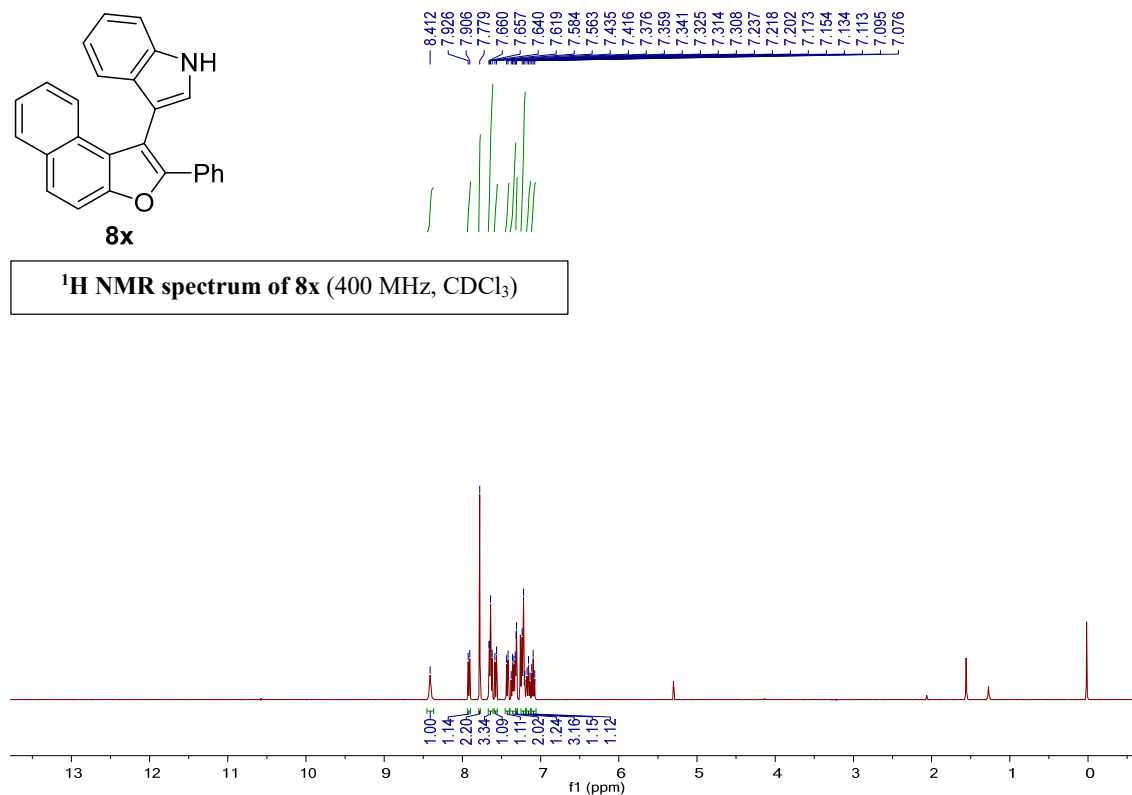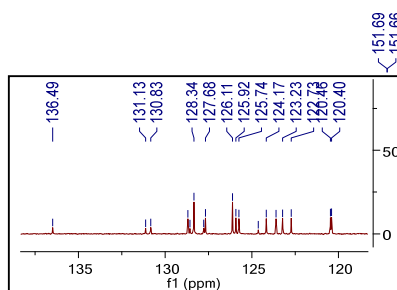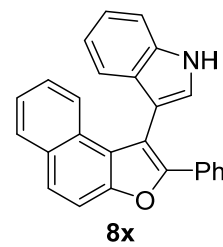

<sup>13</sup>C NMR spectrum of **8x** (100 MHz, CDCl<sub>3</sub>)

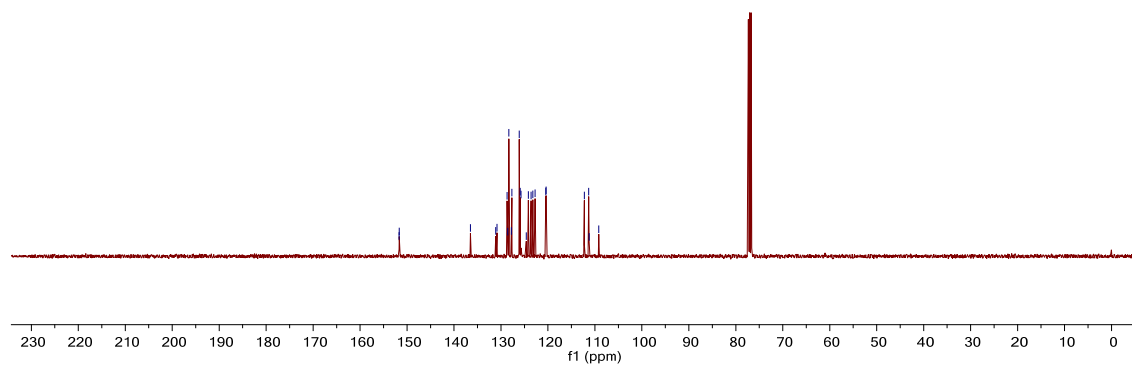

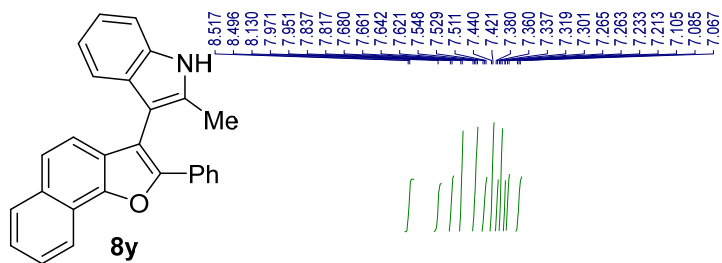

$^1\text{H}$  NMR spectrum of **8y** (400 MHz,  $\text{CDCl}_3$ )

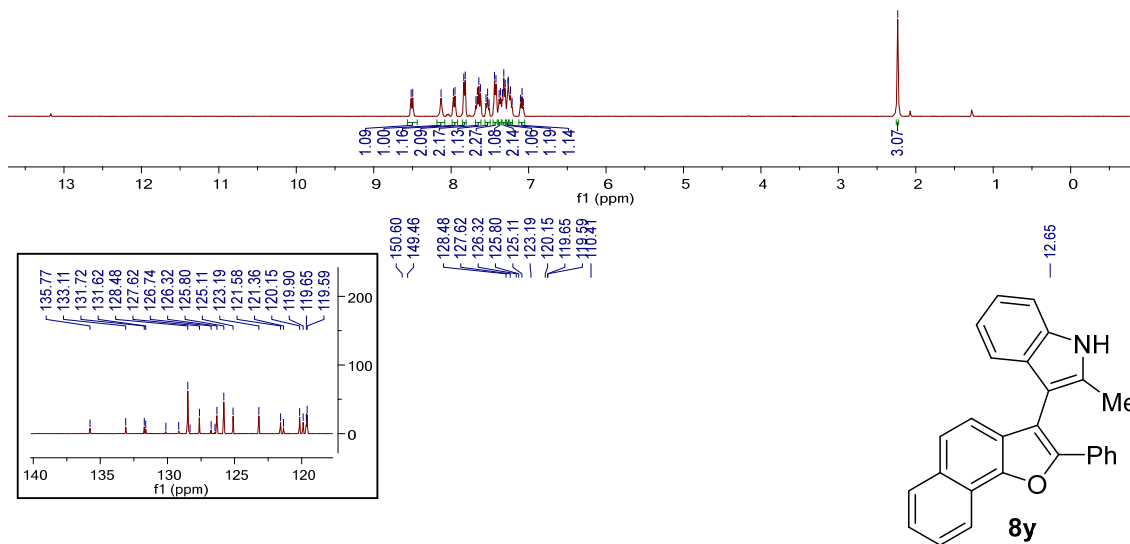

$^{13}\text{C}$  NMR spectrum of **8y** (100 MHz,  $\text{CDCl}_3$ )

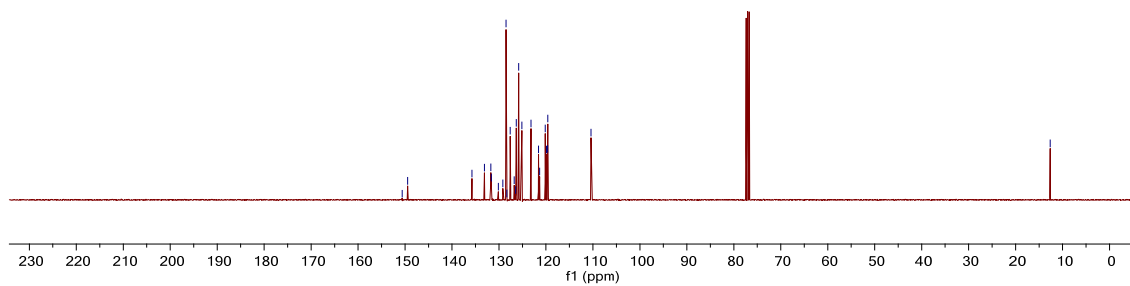

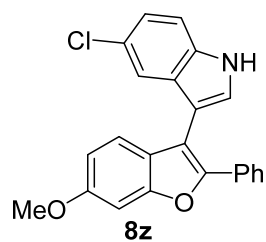

<sup>1</sup>H NMR spectrum of **8z** (400 MHz, CDCl<sub>3</sub>)

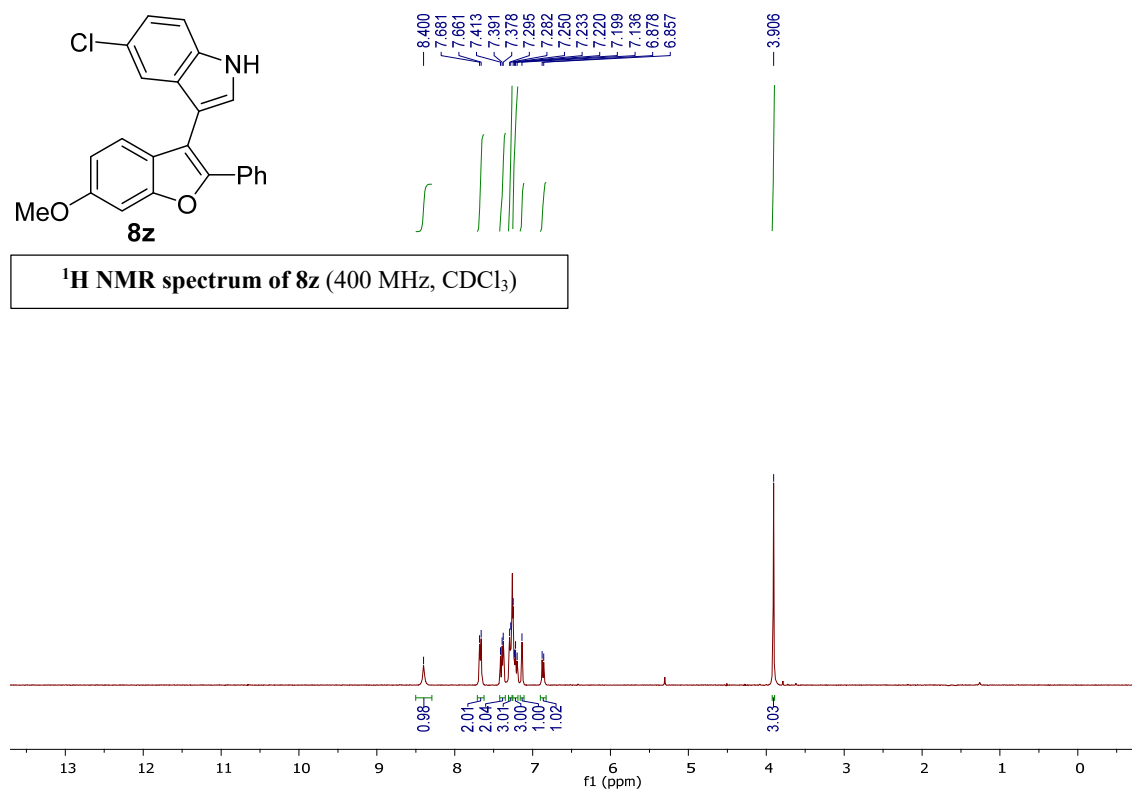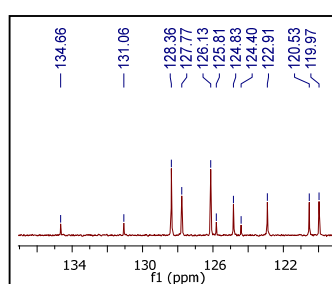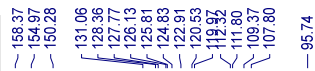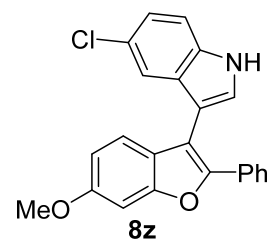

<sup>13</sup>C NMR spectrum of **8z** (100 MHz, CDCl<sub>3</sub>)

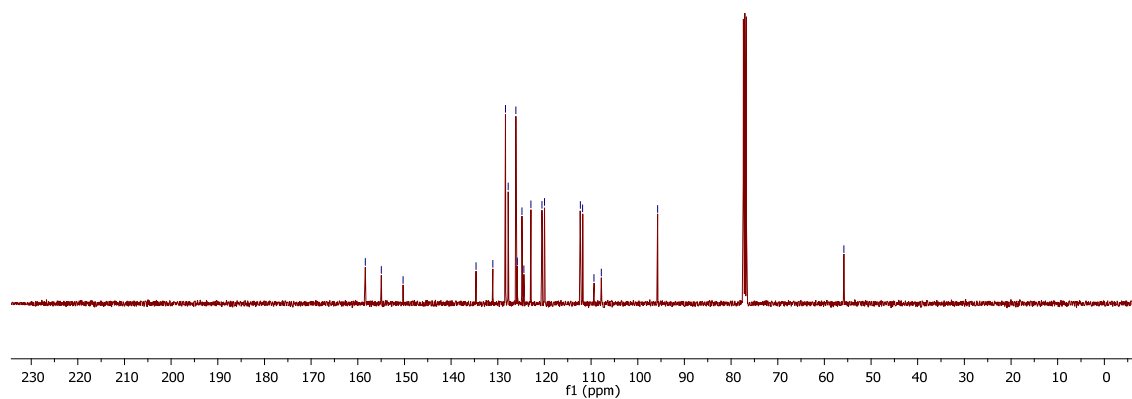



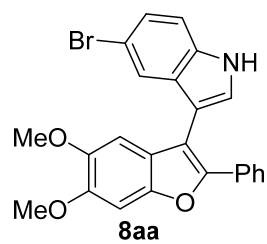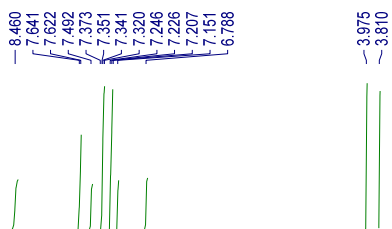

<sup>1</sup>H NMR spectrum of **8aa** (400 MHz, CDCl<sub>3</sub>)

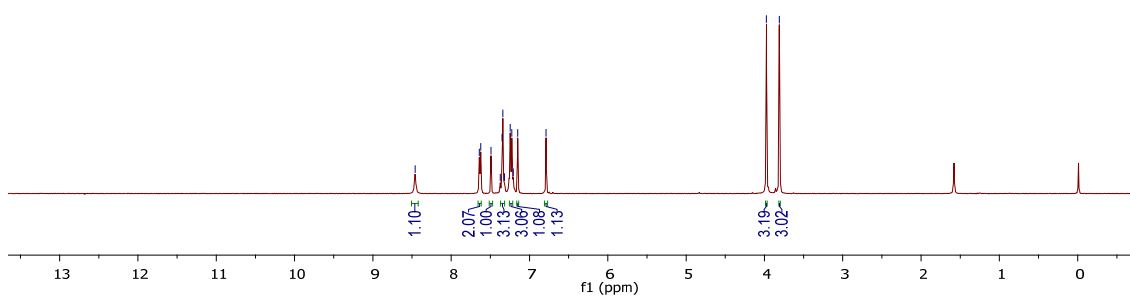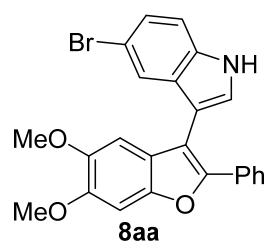

<sup>13</sup>C NMR spectrum of **8aa** (100 MHz, CDCl<sub>3</sub>)

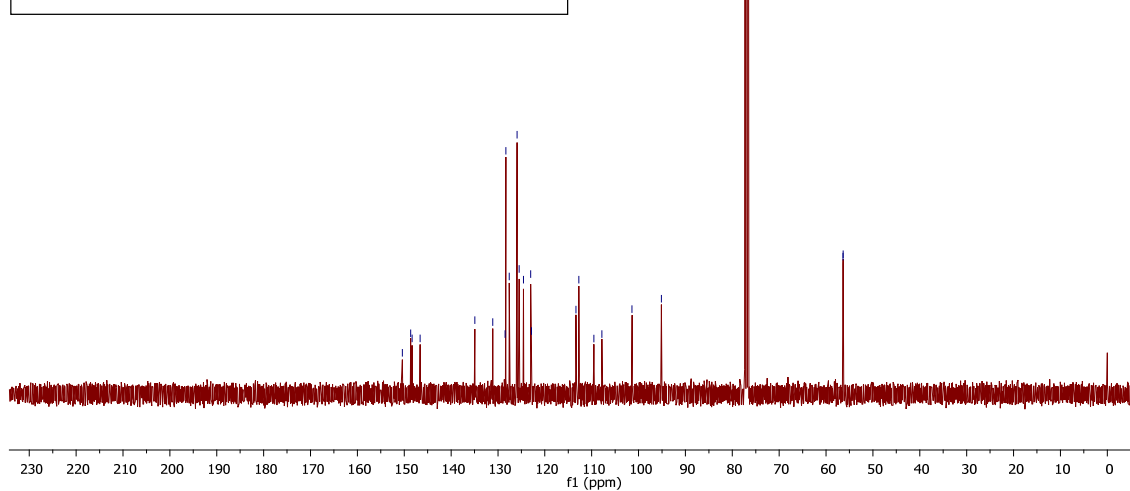

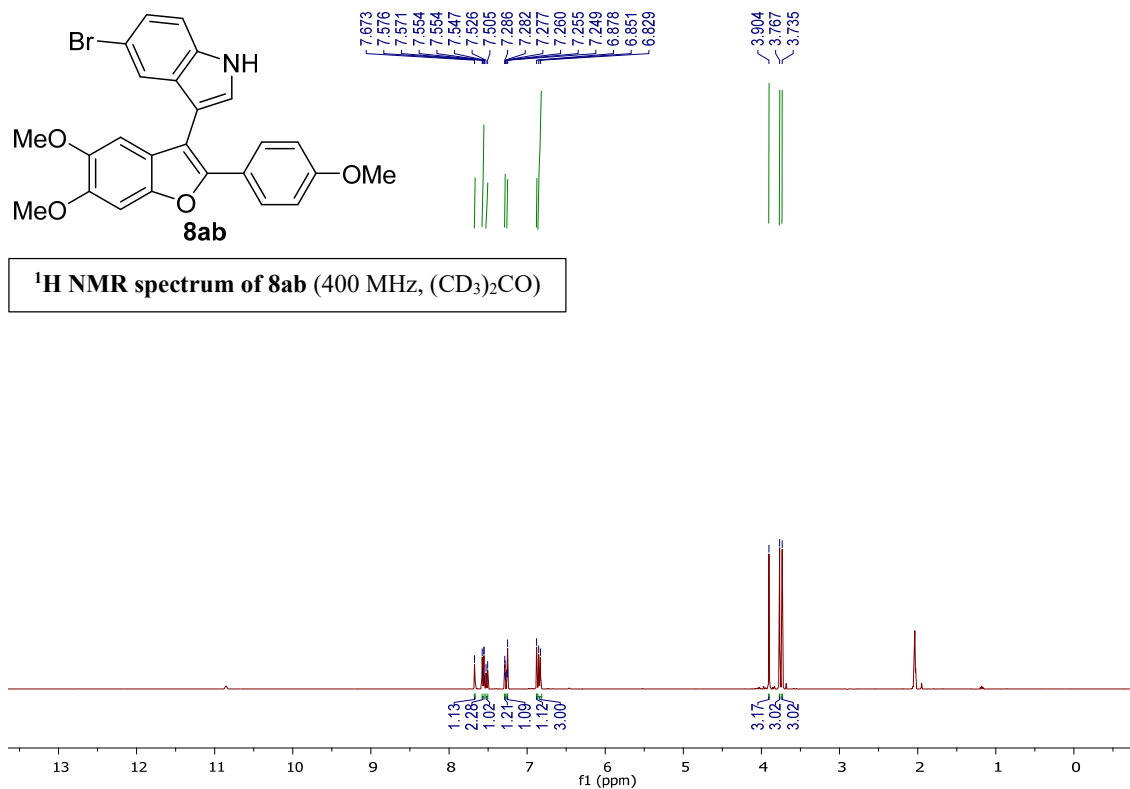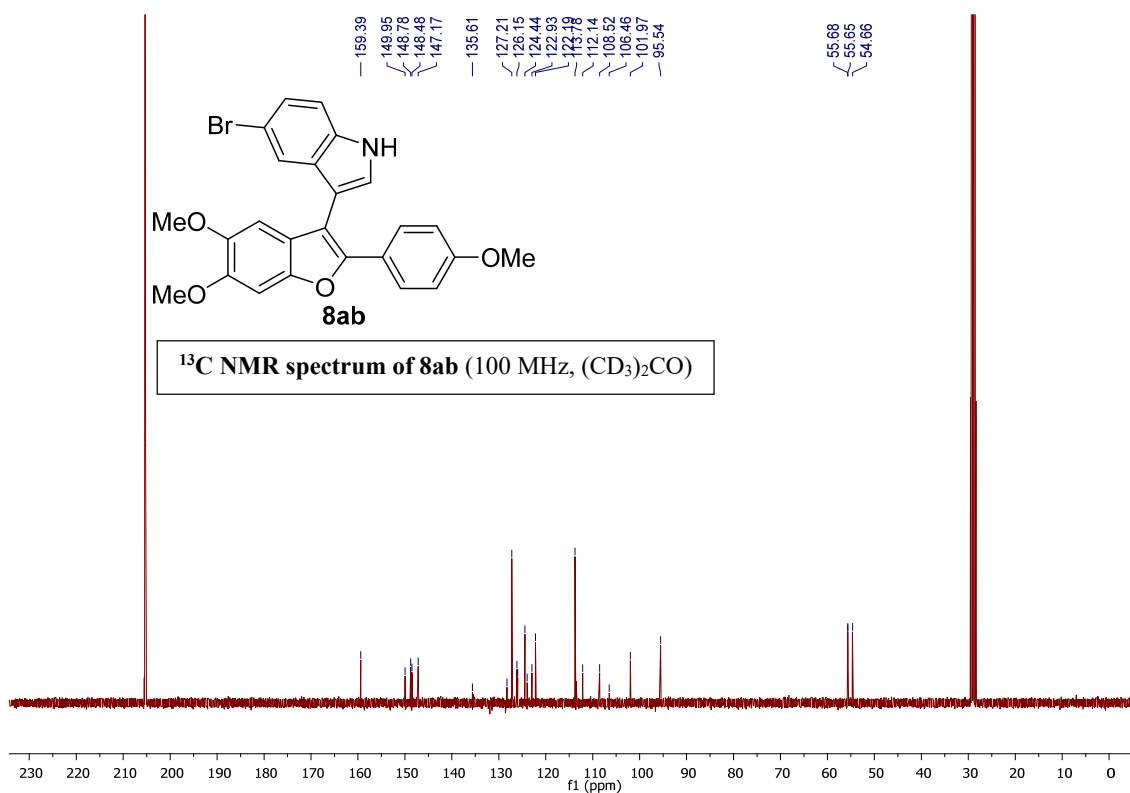

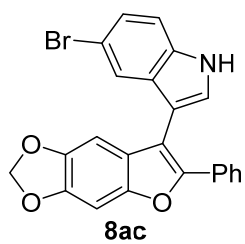

<sup>1</sup>H NMR spectrum of **8ac** (400 MHz, CDCl<sub>3</sub>)

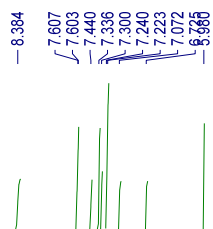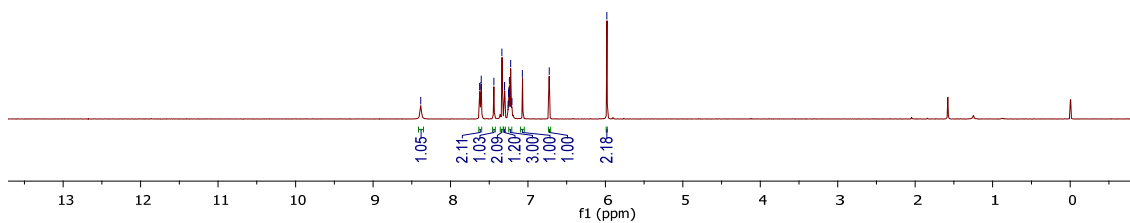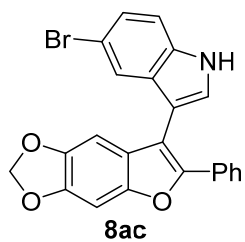

<sup>13</sup>C NMR spectrum of **8ac** (100 MHz, CDCl<sub>3</sub>)

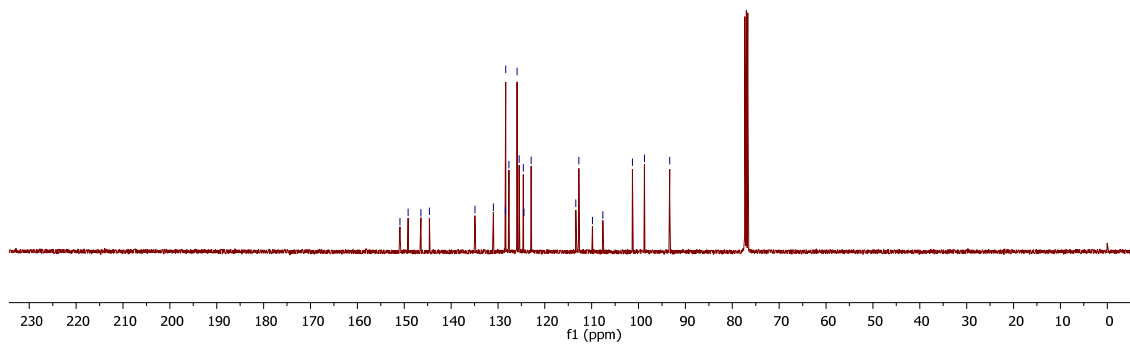

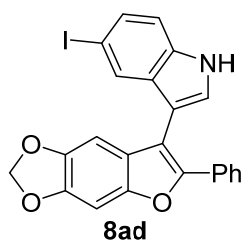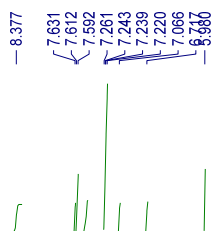

<sup>1</sup>H NMR spectrum of **8ad** (400 MHz, CDCl<sub>3</sub>)

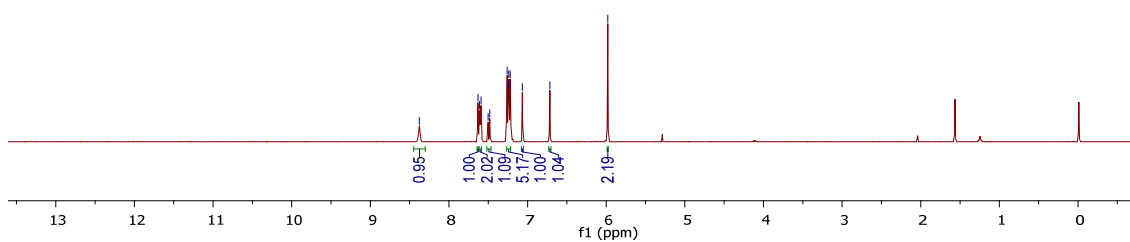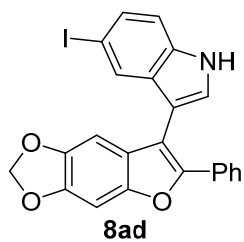

<sup>13</sup>C NMR spectrum of **8ad** (100 MHz, CDCl<sub>3</sub>)

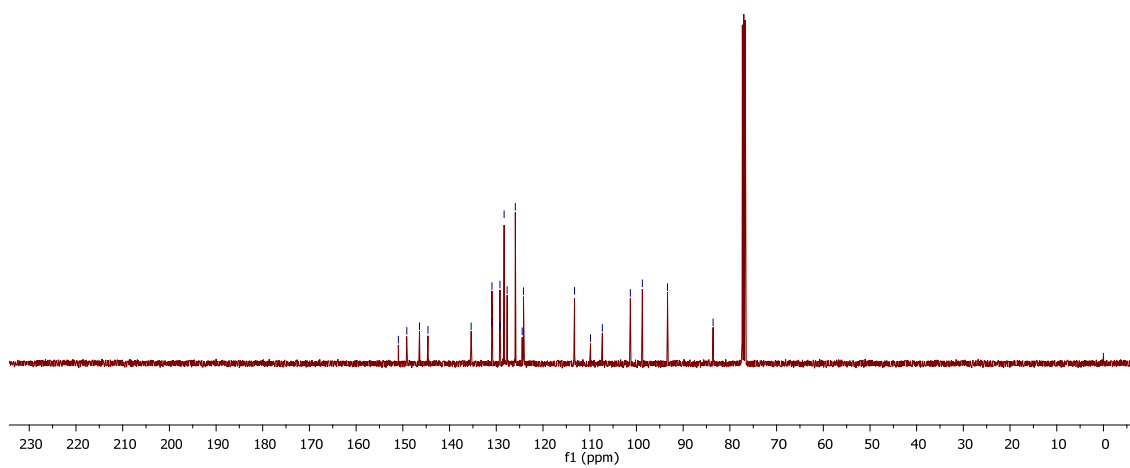

Data Filename 7a.d ACQ Method 506k\_jeesunhee.m Comment Acquired Time 5/19/2023 3:48:43 PM

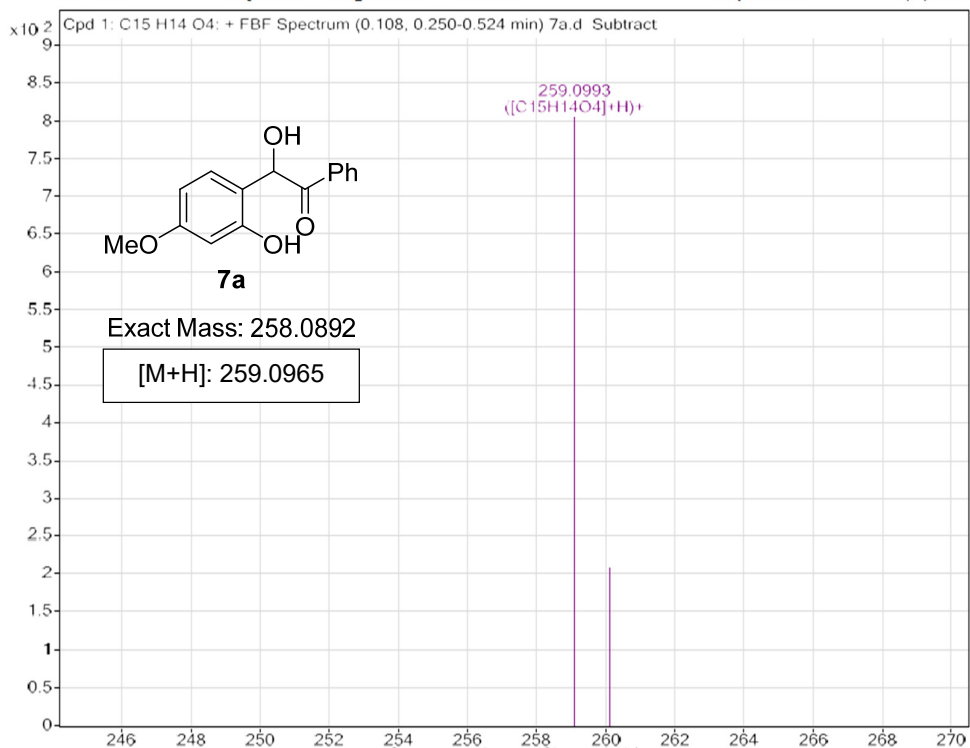

Data Filename 7b.d ACQ Method 506k\_jeesunhee.m Comment Acquired Time 5/19/2023 3:52:27 PM

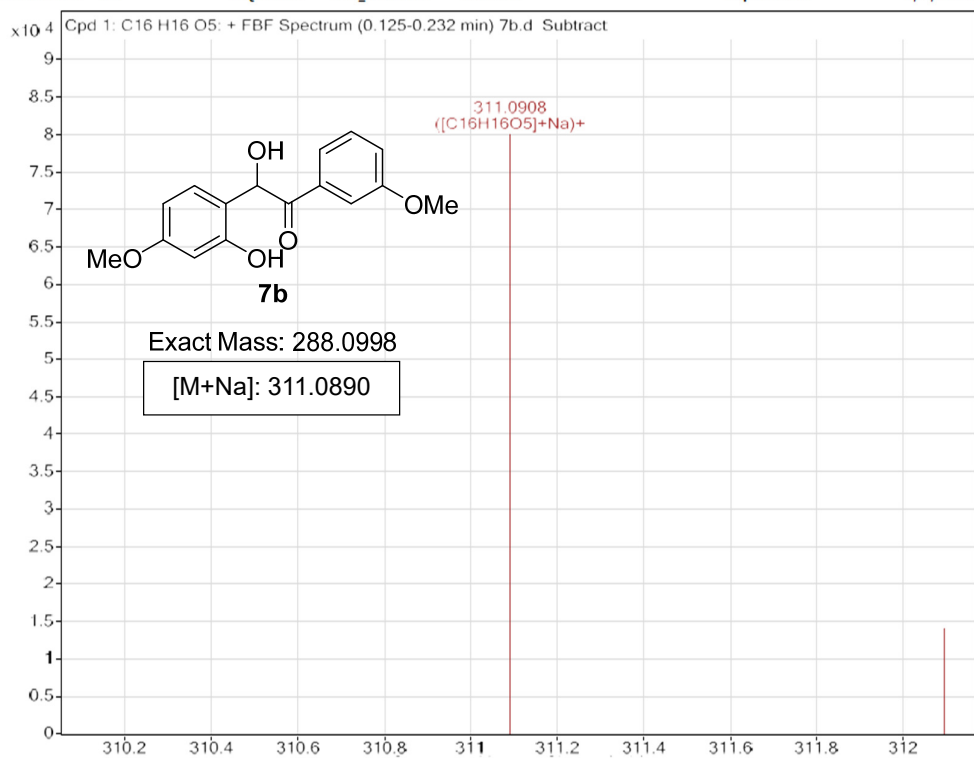

Data Filename 7c.d ACQ Method 506k\_jeesunhee.m\_A2 Comment Acquired Time 1/29/2024 11:41:37 AM

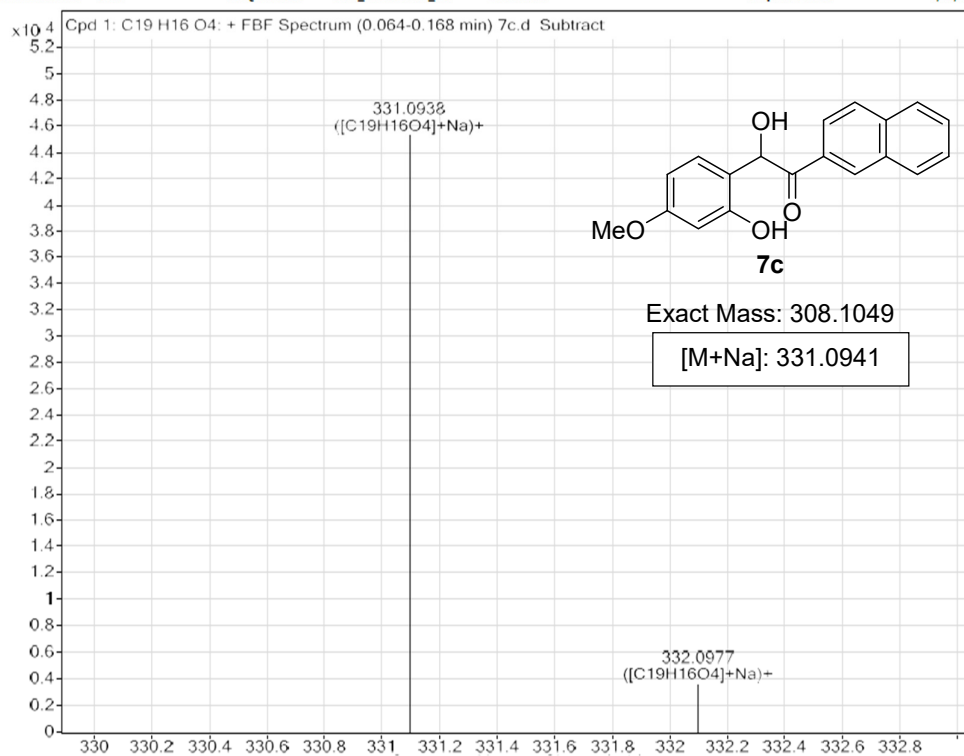

Data Filename 7d.d ACQ Method 506k\_jeesunhee.m Comment Acquired Time 5/19/2023 3:59:51 PM

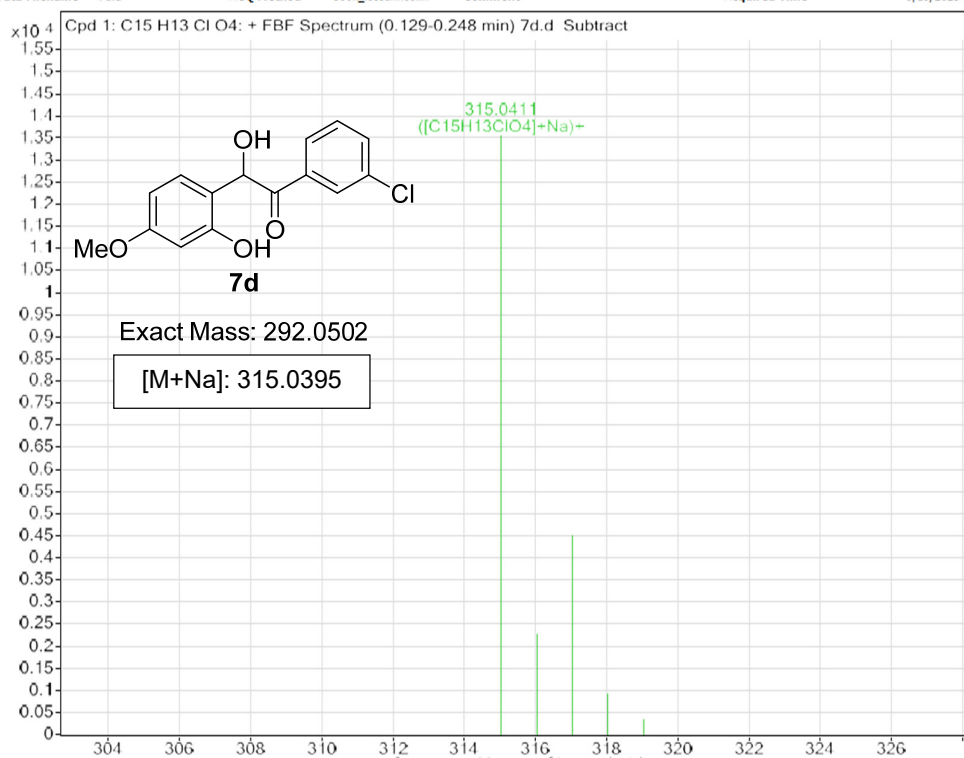

Data Filename 7e.d ACQ Method 506k\_jeesunhee.m Comment Acquired Time 5/19/2023 4:03:33 PM

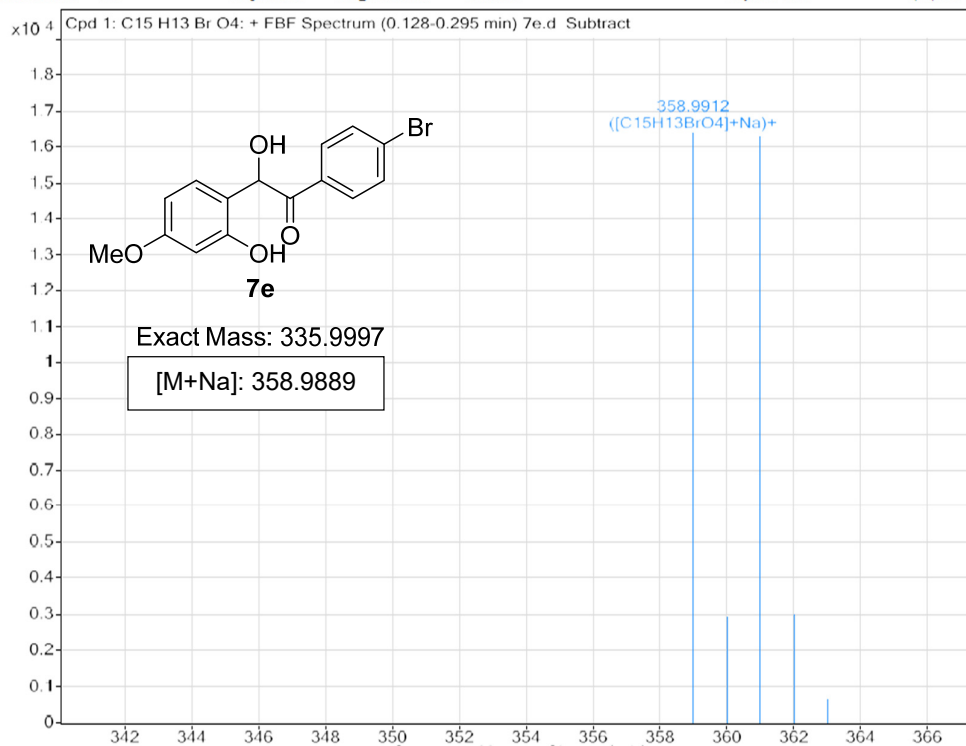

Data Filename 7f.d ACQ Method 506k\_jeesunhee.m Comment Acquired Time 5/19/2023 4:07:15 PM

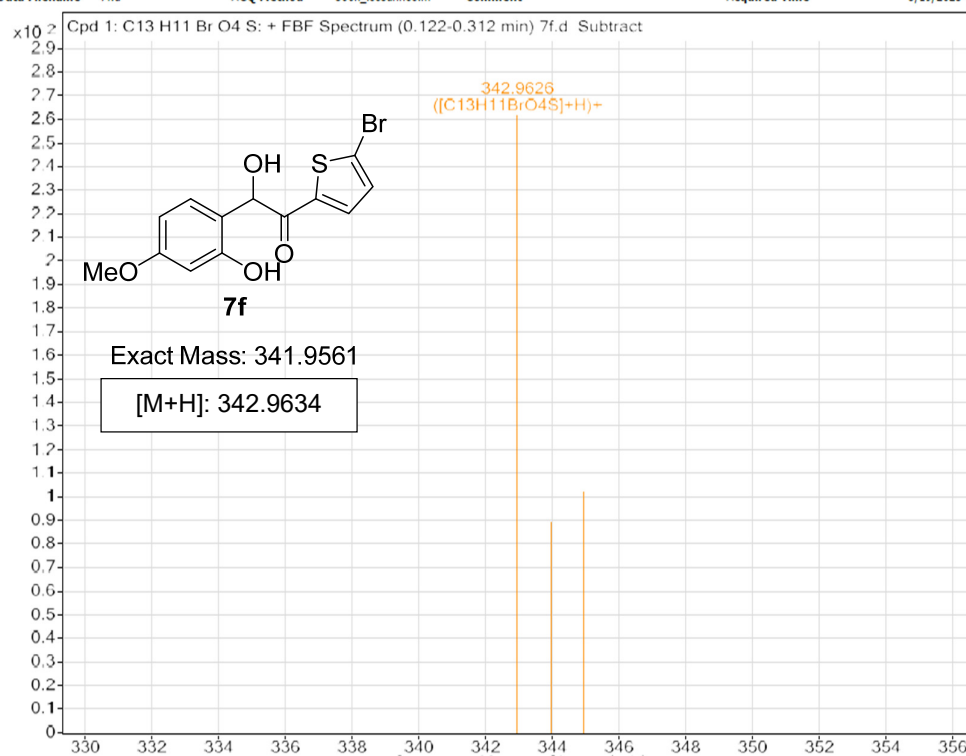

Data Filename 7g.d ACQ Method 506k\_leesunhee.m Comment Acquired Time 5/19/2023 3:52:27 PM

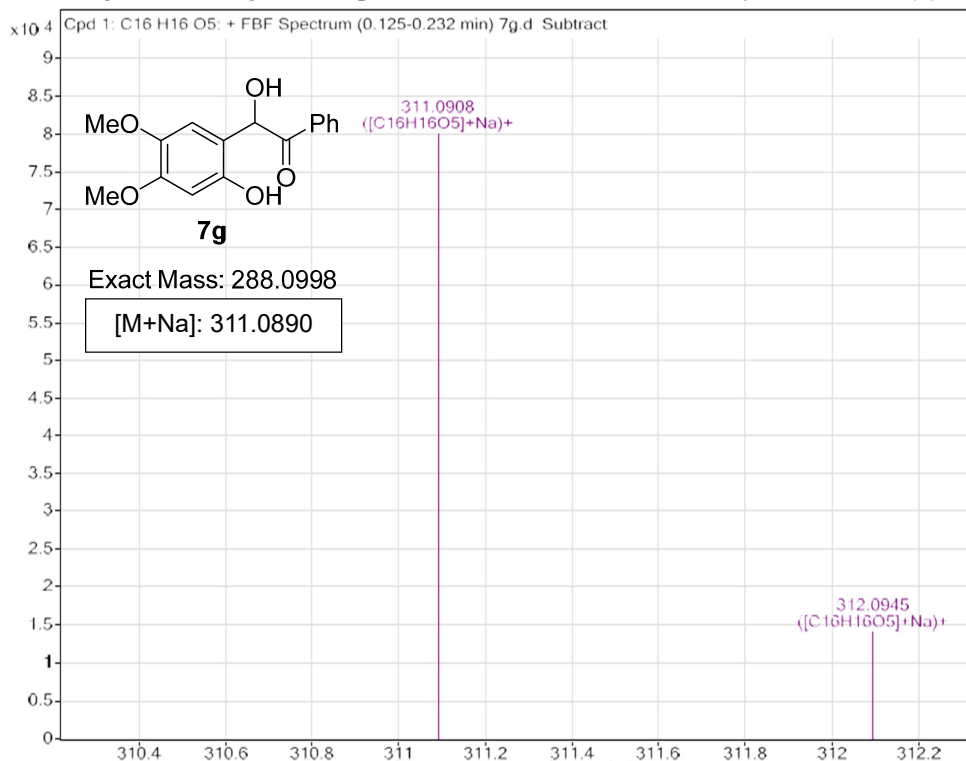

Data Filename 7h-1.d ACQ Method 506k\_leesunhee.m Comment Acquired Time 5/19/2023 4:10:56 PM

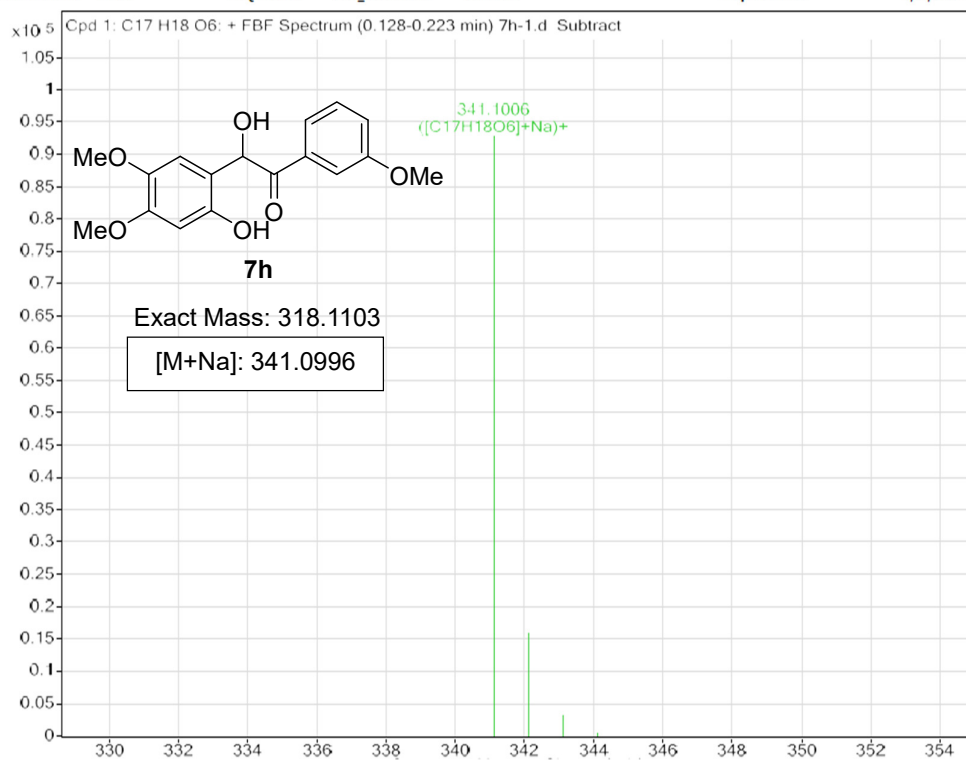



Data Filename 7i.d ACQ Method 506k\_leesunhee.m Comment Acquired Time 5/19/2023 4:10:56 PM

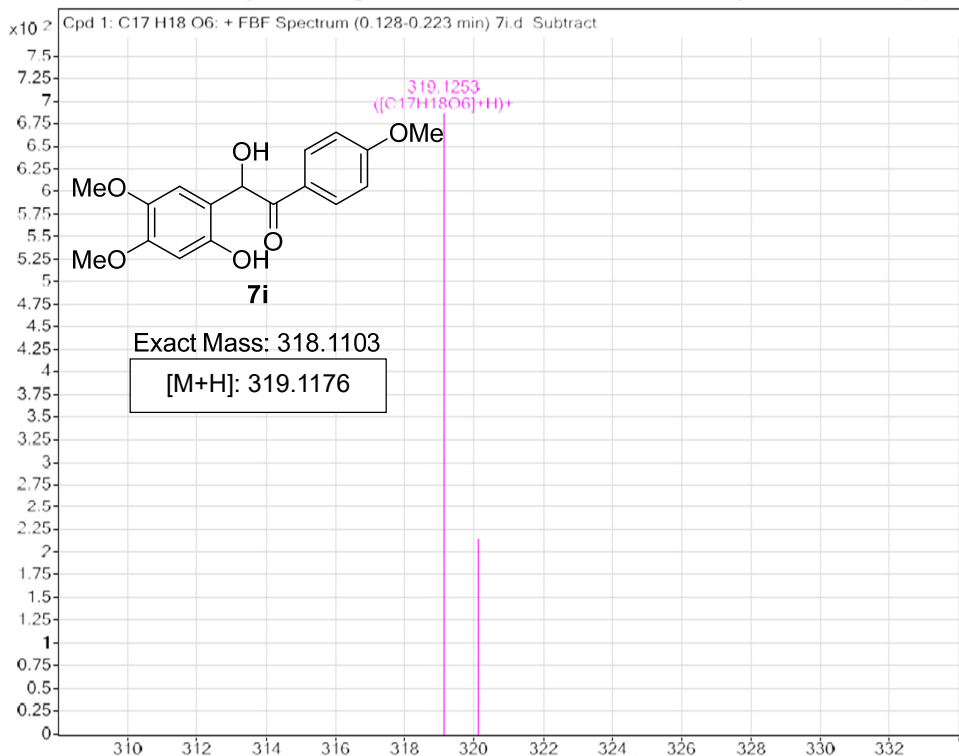

Data Filename 7j.d ACQ Method 506k\_leesunhee.m Comment Acquired Time 5/19/2023 4:14:39 PM

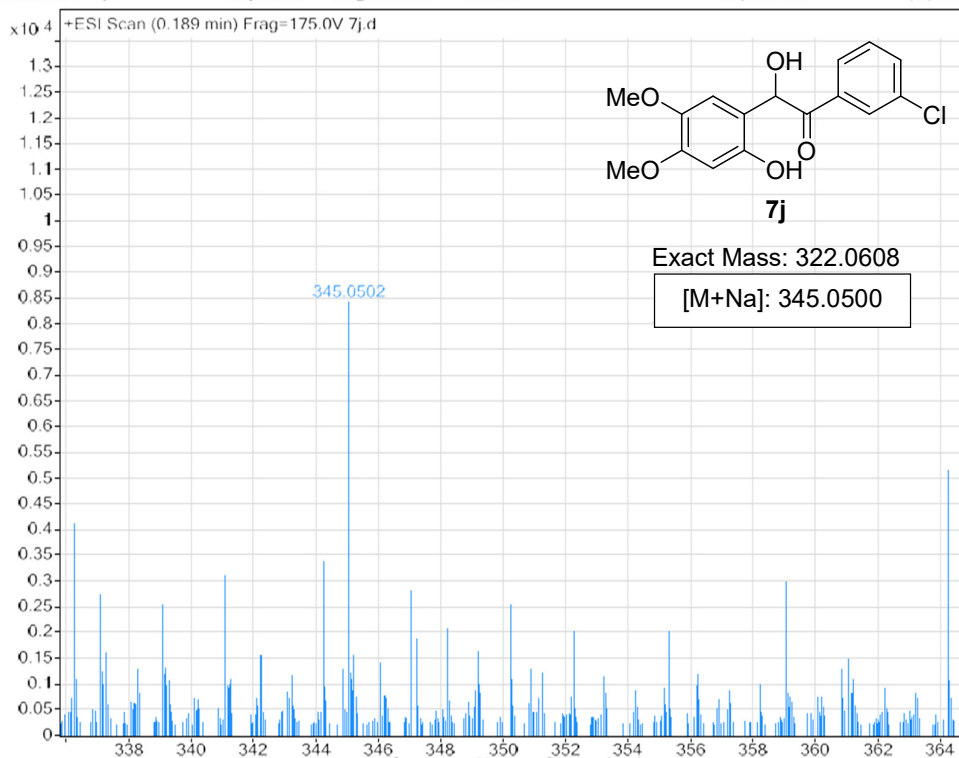

Data Filename 7k.d ACQ Method 506k\_jeesunhee.m Comment Acquired Time 5/19/2023 4:18:21 PM

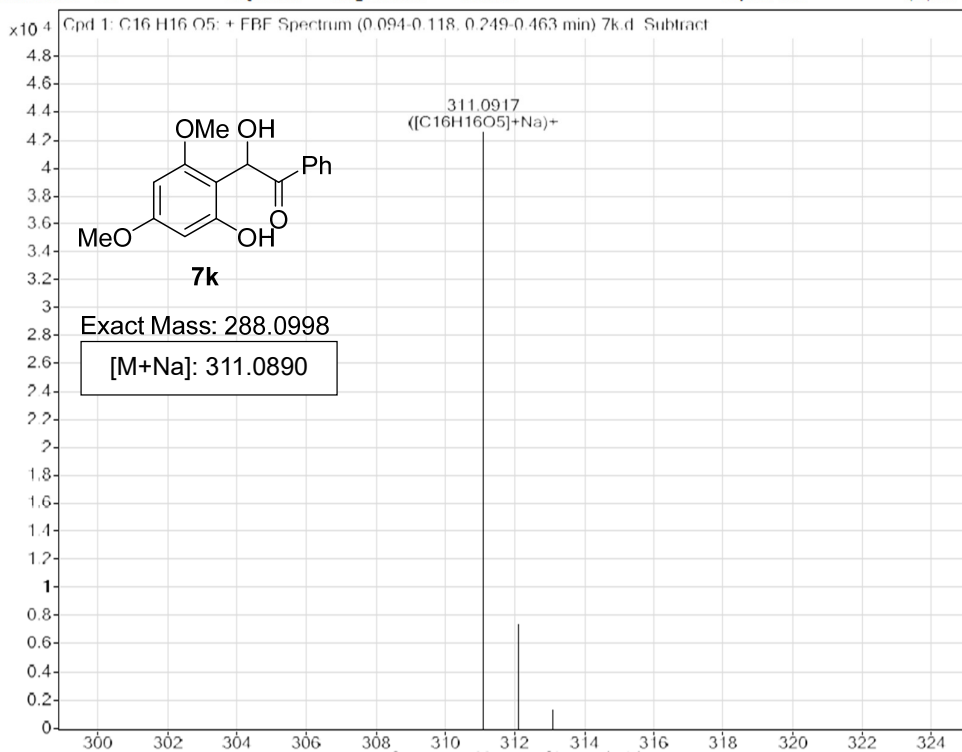

Data Filename 7l.d ACQ Method 506k\_jeesunhee.m Comment Acquired Time 5/19/2023 4:22:06 PM

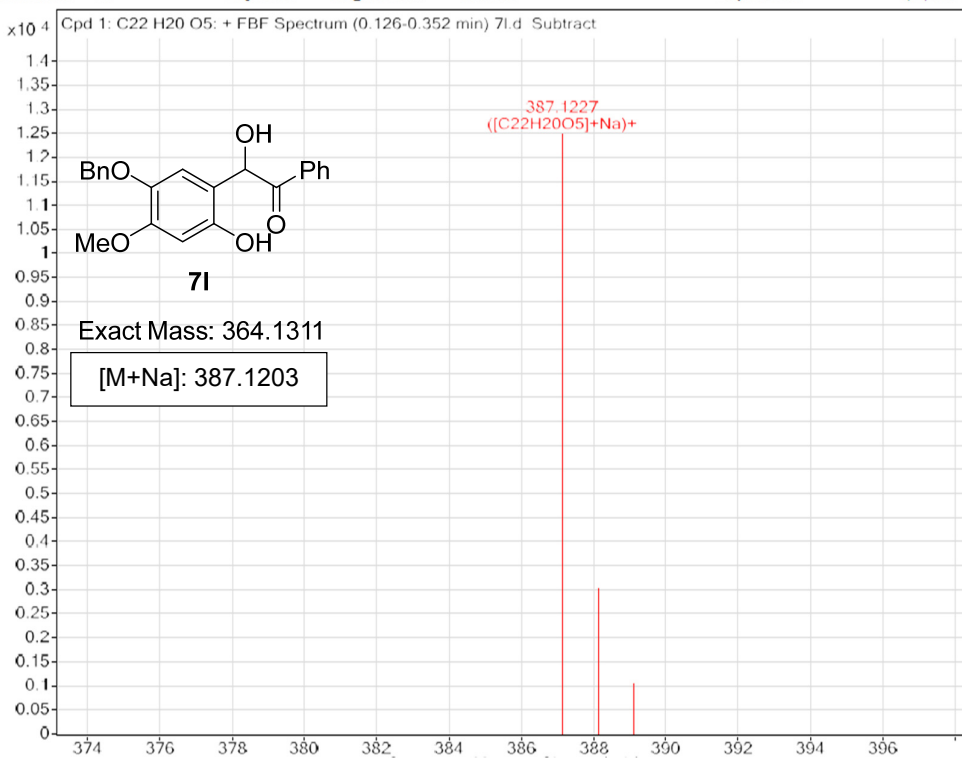

Data Filename 7m.d ACQ Method 506k\_jeesunhee.m\_A2 Comment Acquired Time 1/29/2024 12:04:03 PM

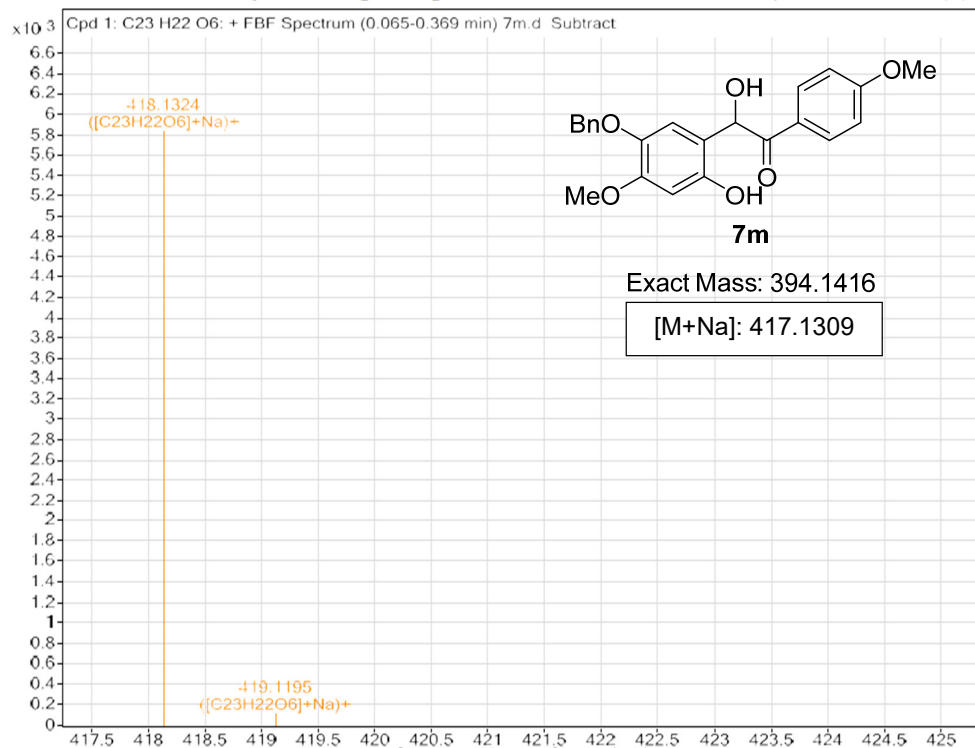

Data Filename 7n.d ACQ Method 506k\_jeesunhee.m Comment Acquired Time 5/19/2023 4:25:48 PM

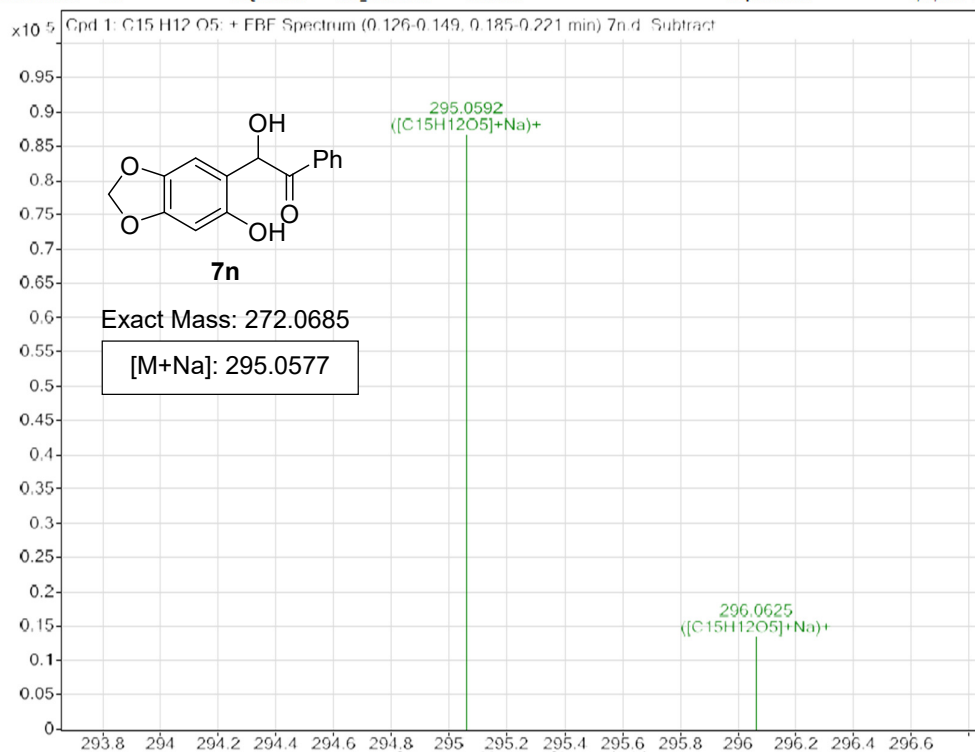

Data Filename 7o.d ACQ Method 506k\_jeesunhee.m Comment Acquired Time 5/19/2023 4:29:30 PM

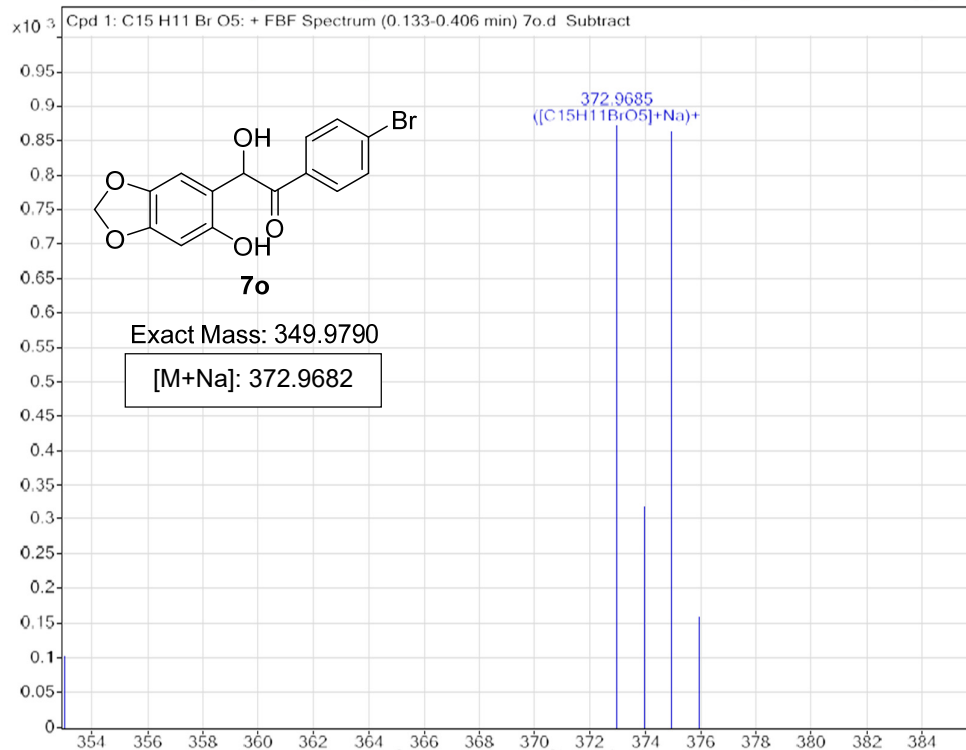

Data Filename 7p.d ACQ Method 506k\_jeesunhee.m Comment Acquired Time 5/19/2023 4:33:13 PM

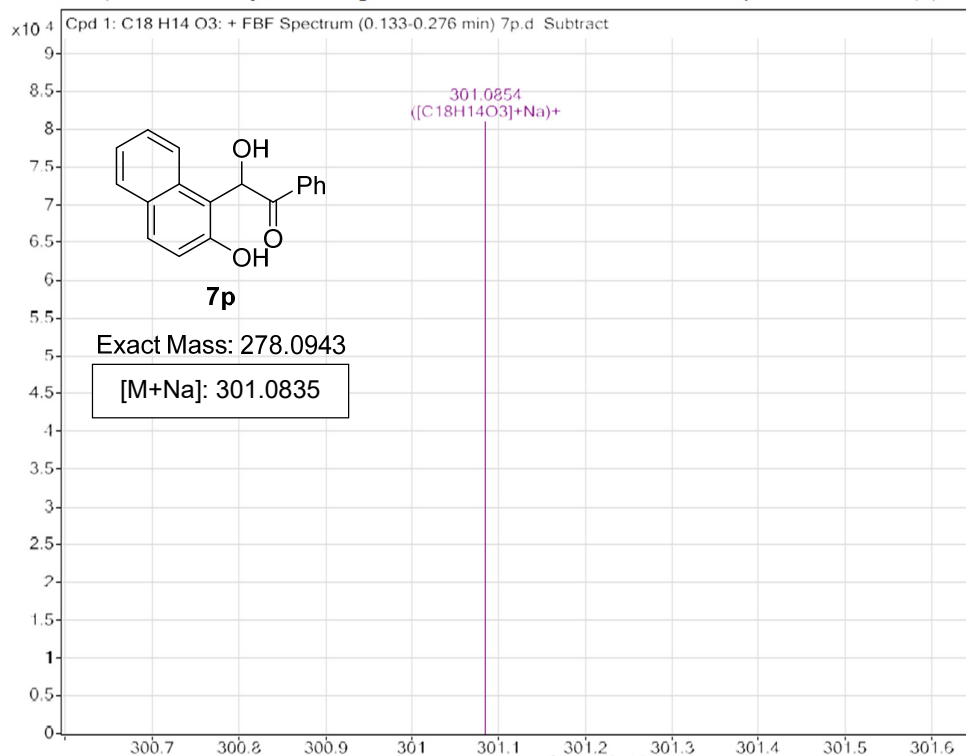

Data Filename 7q.d ACQ Method 506k\_jeesunhee.m Comment Acquired Time 5/19/2023 4:36:55 PM

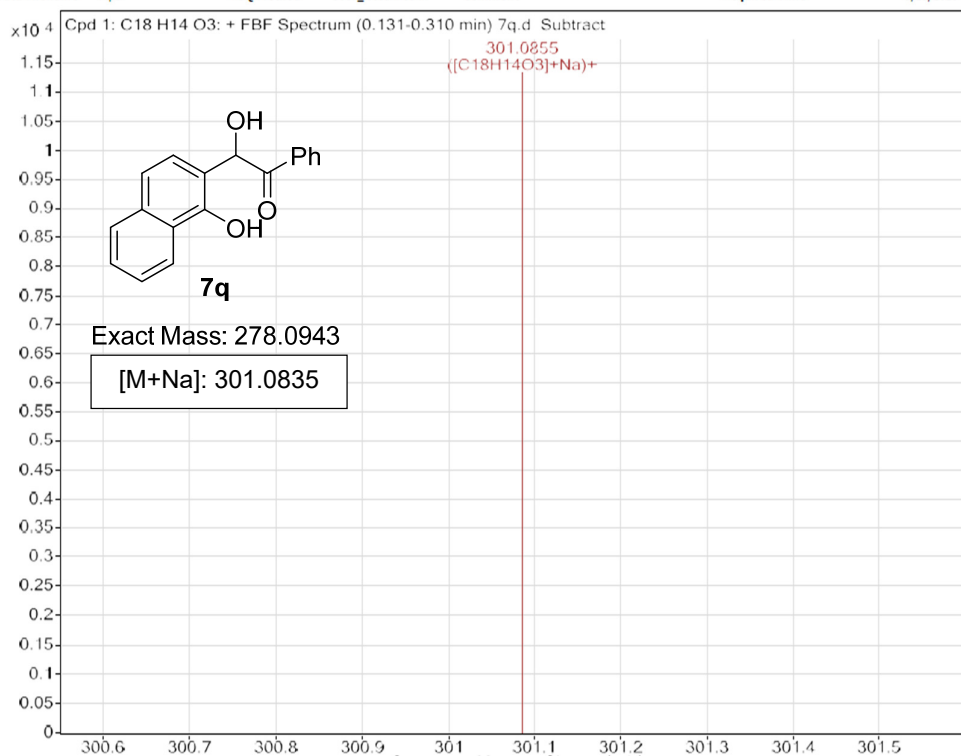

| Data Filename | 8a.d | ACQ Method | Comment | Sample information is unavailable | Acquired Time | Unavailable |
|---------------|------|------------|---------|-----------------------------------|---------------|-------------|
|---------------|------|------------|---------|-----------------------------------|---------------|-------------|

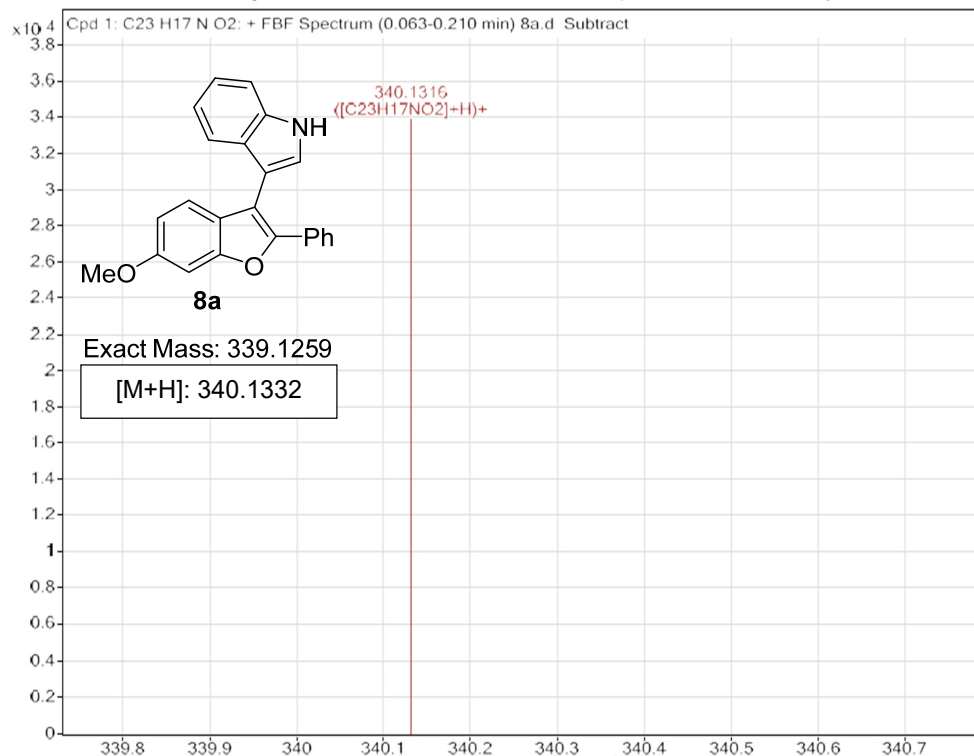

| Data Filename | 8b.d | ACQ Method | 506k_leesunhee.m | Comment | Acquired Time | 5/19/2023 4:44:20 PM |
|---------------|------|------------|------------------|---------|---------------|----------------------|
|---------------|------|------------|------------------|---------|---------------|----------------------|

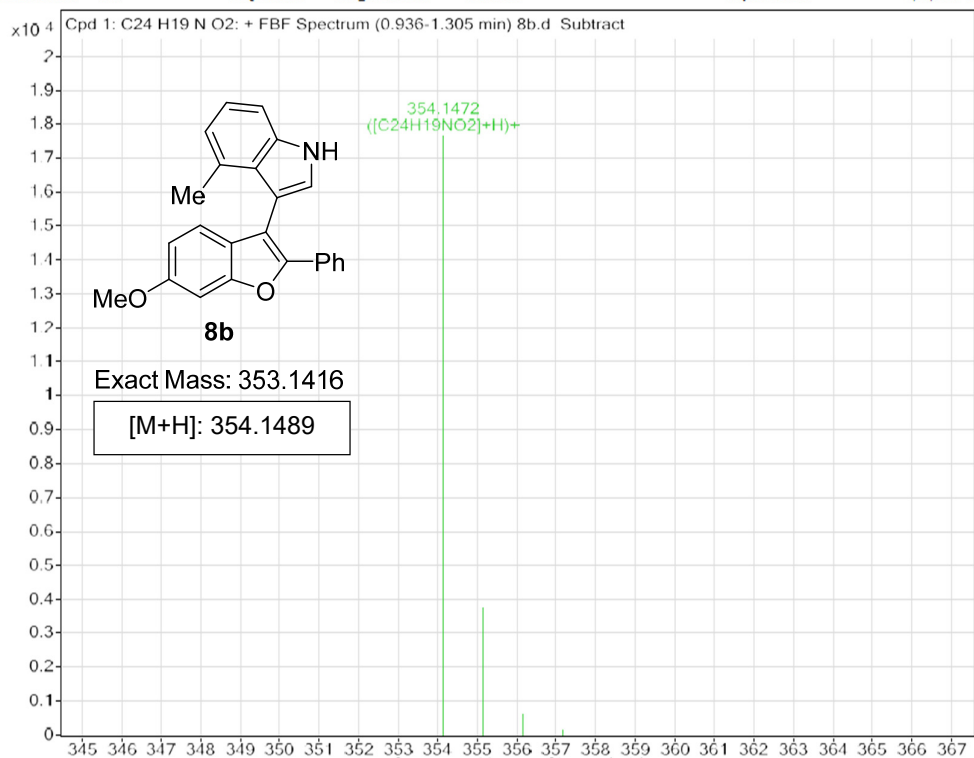

Data Filename 8c.d ACQ Method 506k\_jeesunhee.m\_A2. Comment Acquired Time 1/29/2024 2:40:30 PM

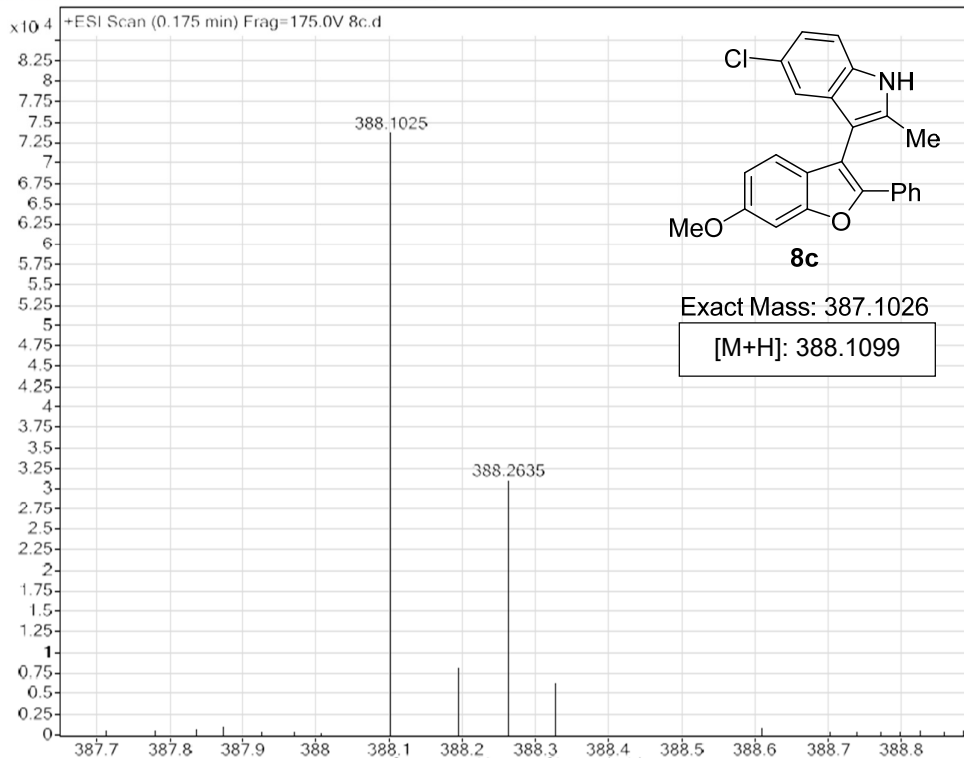

Data Filename 8d.d ACQ Method Comment Sample information is unavailable Acquired Time Unavailable

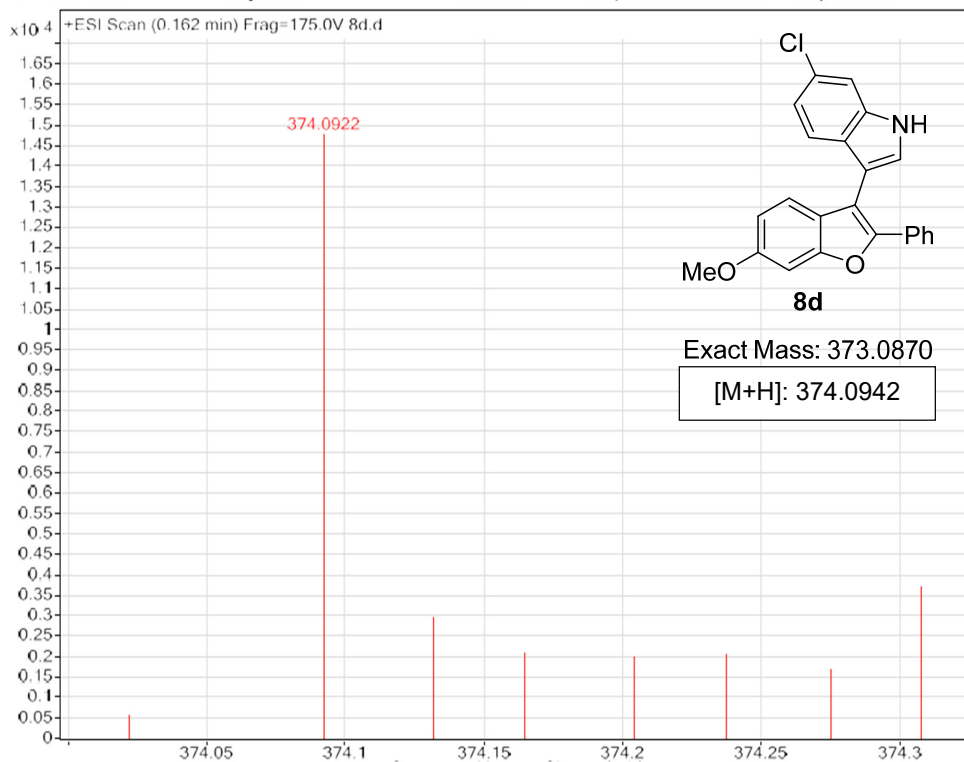

Data Filename 8e.d ACQ Method Comment Sample information is unavailable Acquired Time Unavailable

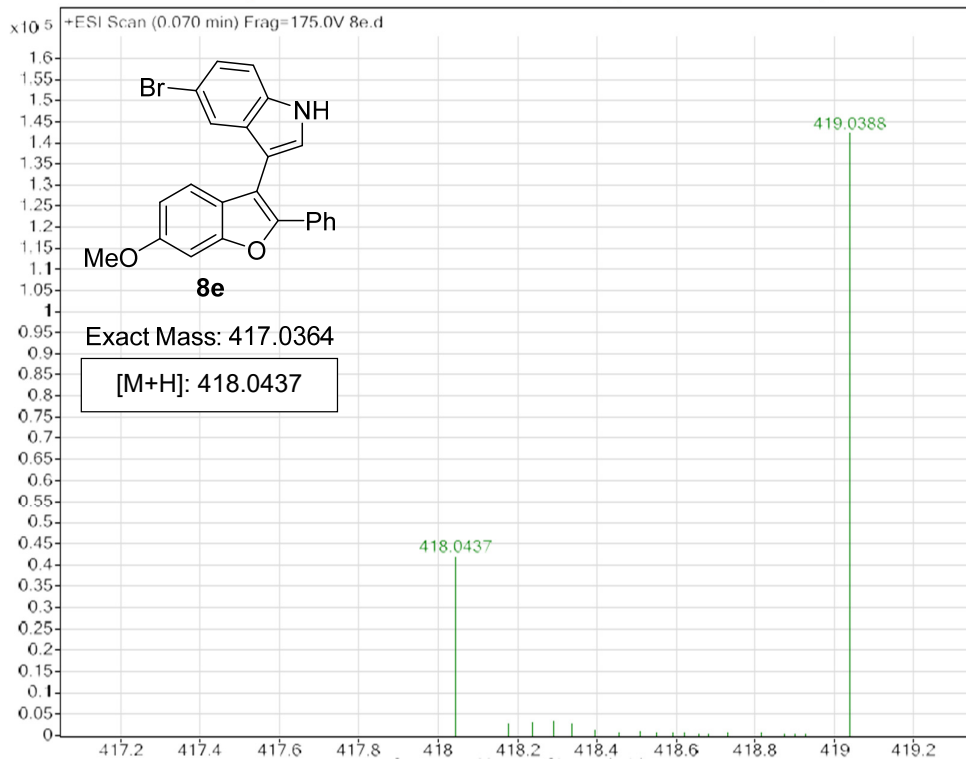

Data Filename 8f.d ACQ Method 506k\_jeesunhee.m\_A2. Comment Acquired Time 1/29/2024 2:51:37 PM

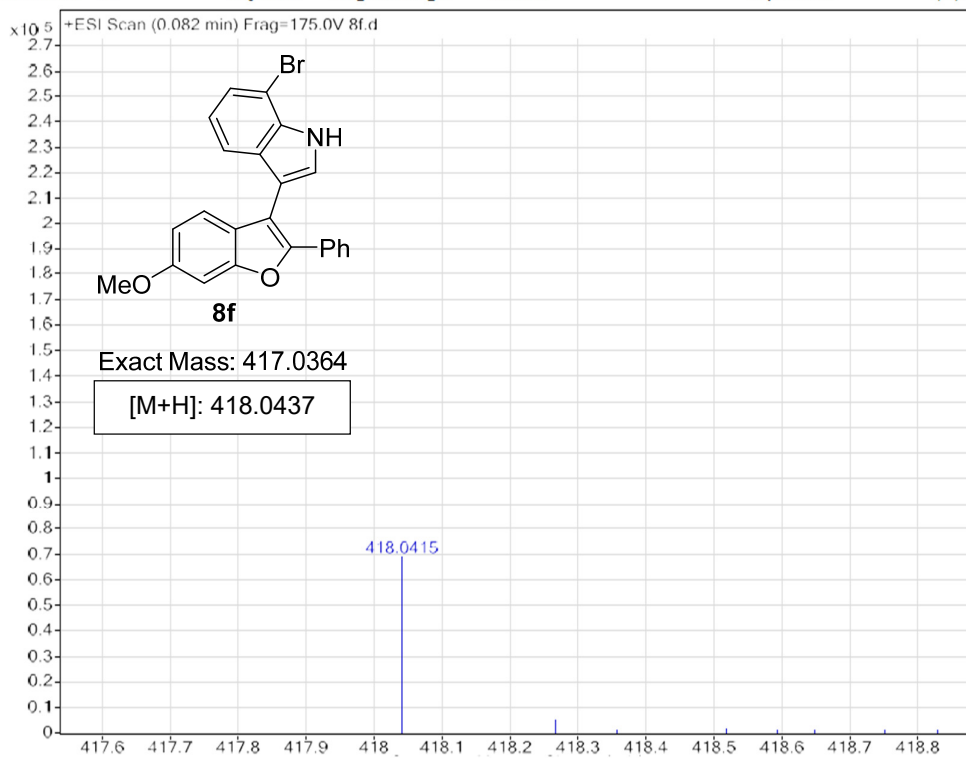



Data Filename 8g.d ACQ Method 506k\_leesunhee.m\_A2 Comment Acquired Time 1/29/2024 12:26:21 PM

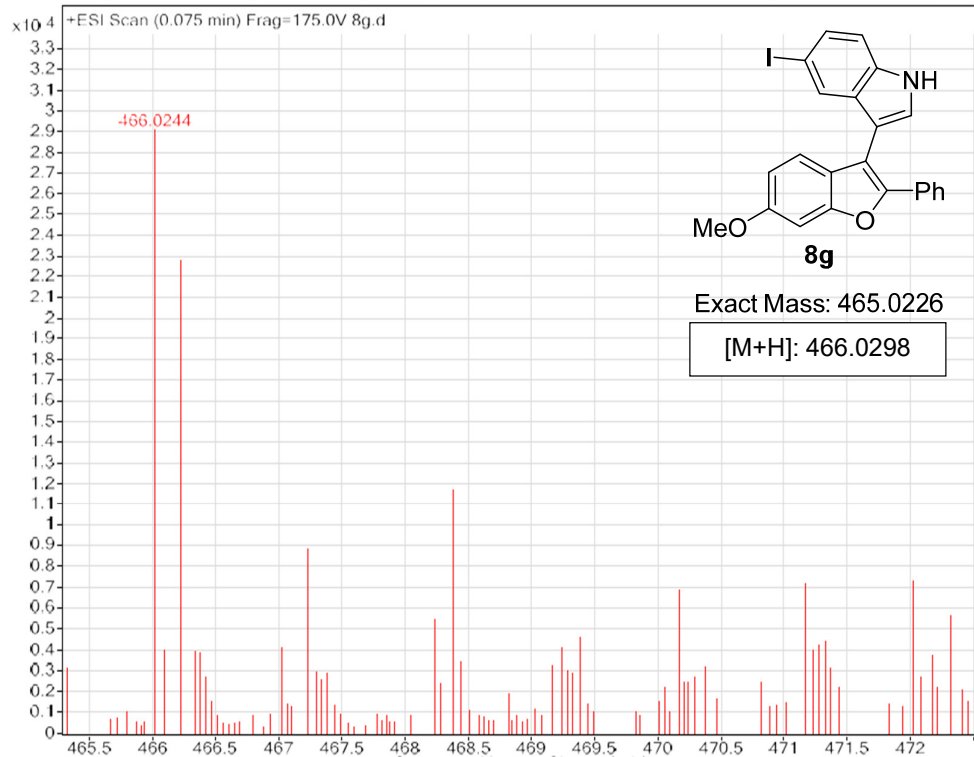

Data Filename 8h.d ACQ Method 506k\_leesunhee.m Comment Acquired Time 5/19/2023 5:06:34 PM

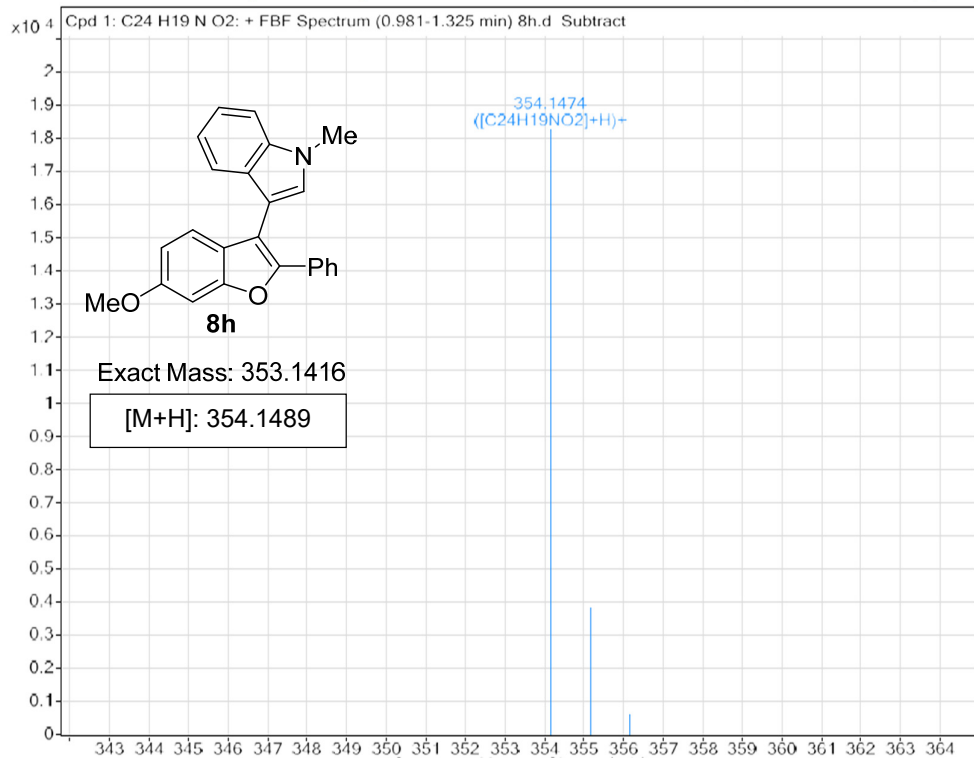

Data Filename 8i.d ACQ Method 506k\_jeesunhee.m Comment Acquired Time 5/19/2023 5:10:17 PM

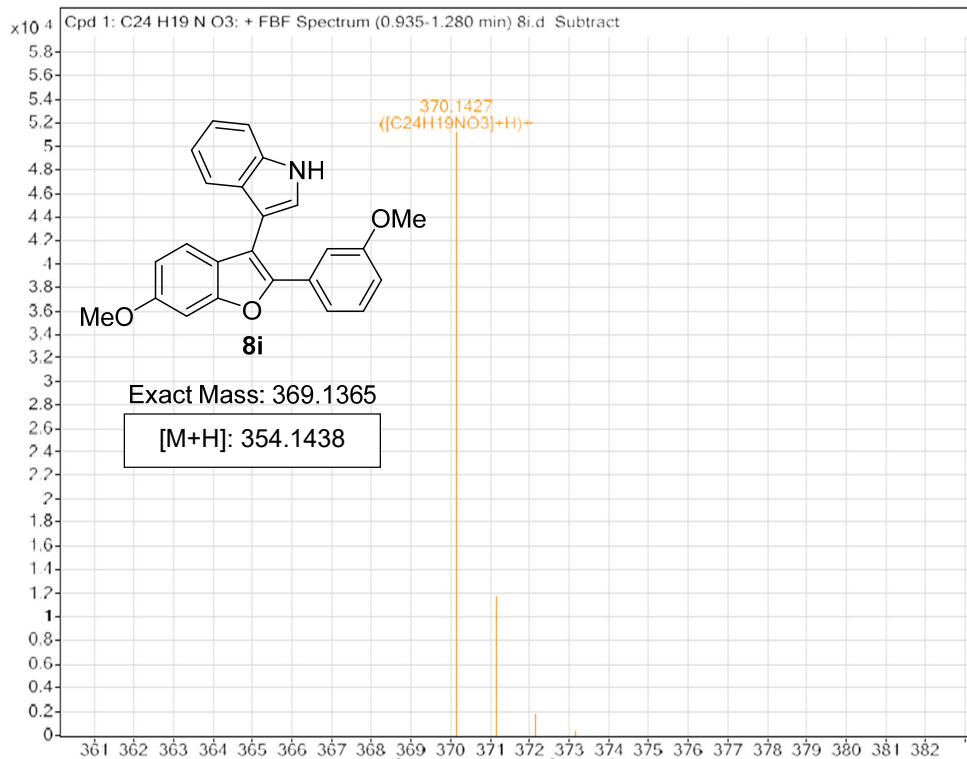

Data Filename 8j.d ACQ Method 506k\_jeesunhee.m Comment Acquired Time 5/19/2023 5:13:59 PM

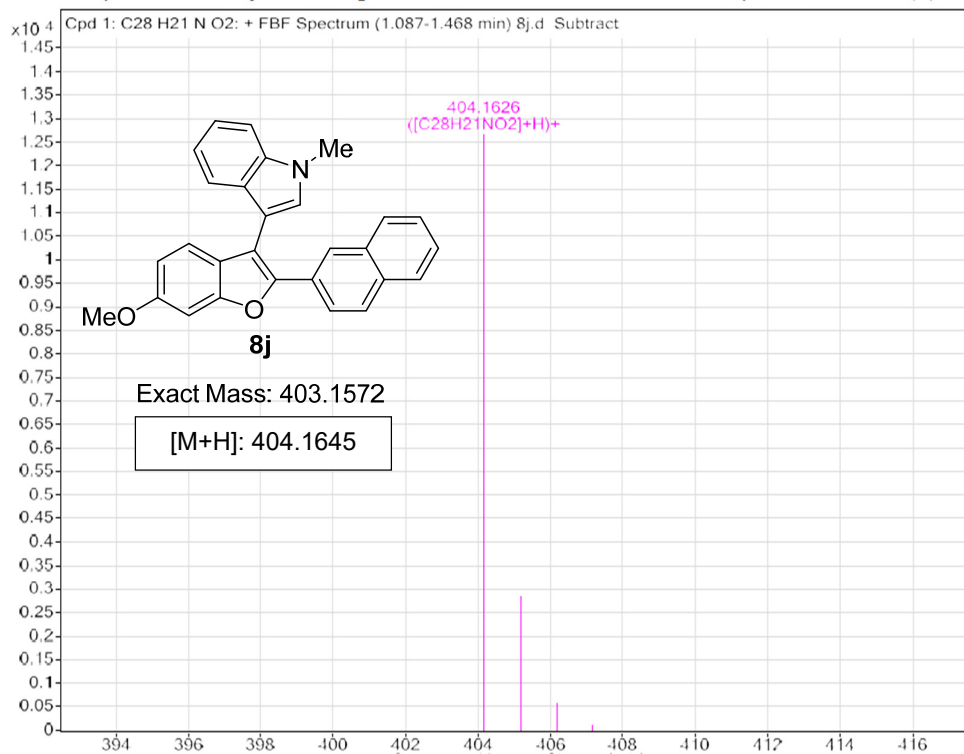

Data Filename 8k.d ACQ Method 506k\_jeesunhee.m\_A2 Comment Acquired Time 1/29/2024 2:59:05 PM

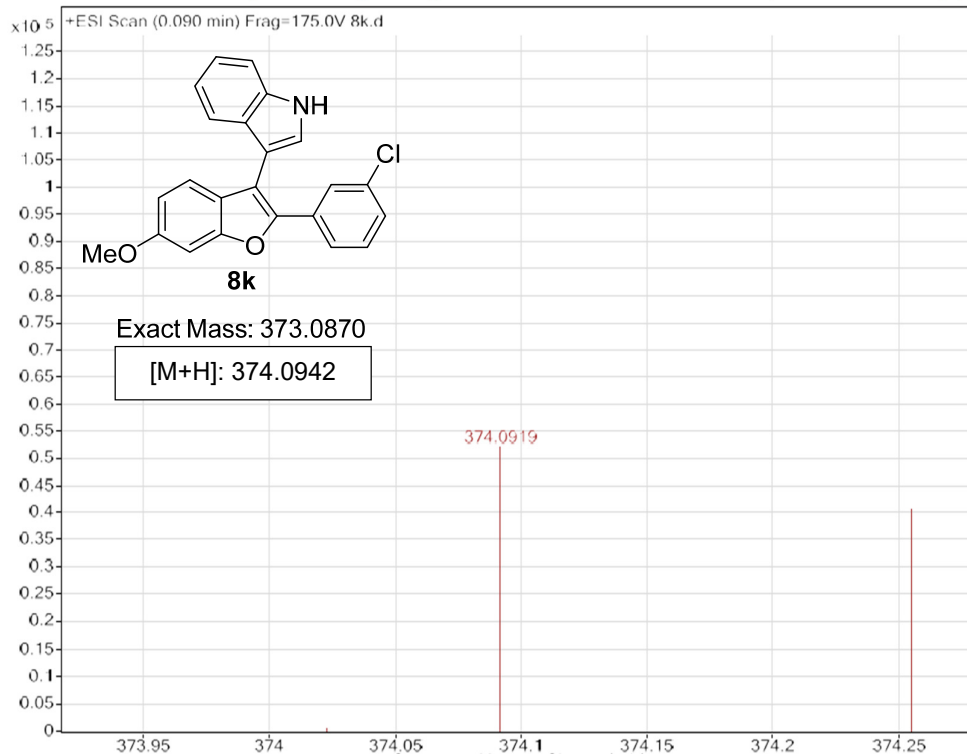

Data Filename 8l.d ACQ Method 506k\_jeesunhee.m\_A2 Comment Acquired Time 1/29/2024 3:02:49 PM

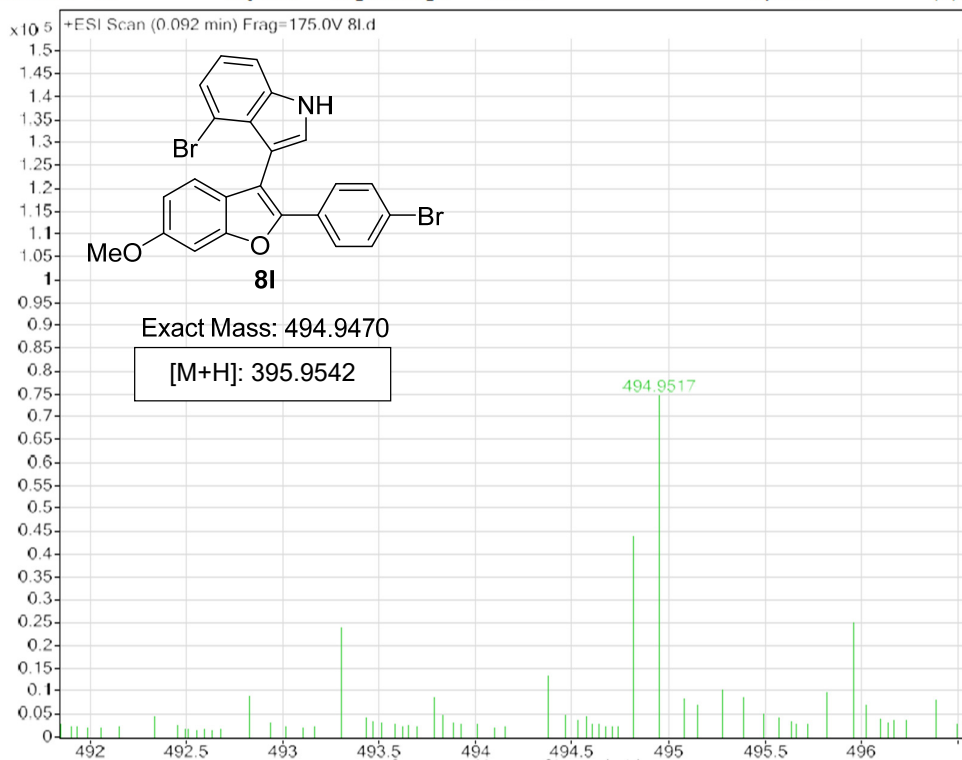

Data Filename 8n.d ACQ Method 506k\_jeesunhee.m Comment Acquired Time 5/19/2023 5:28:49 PM

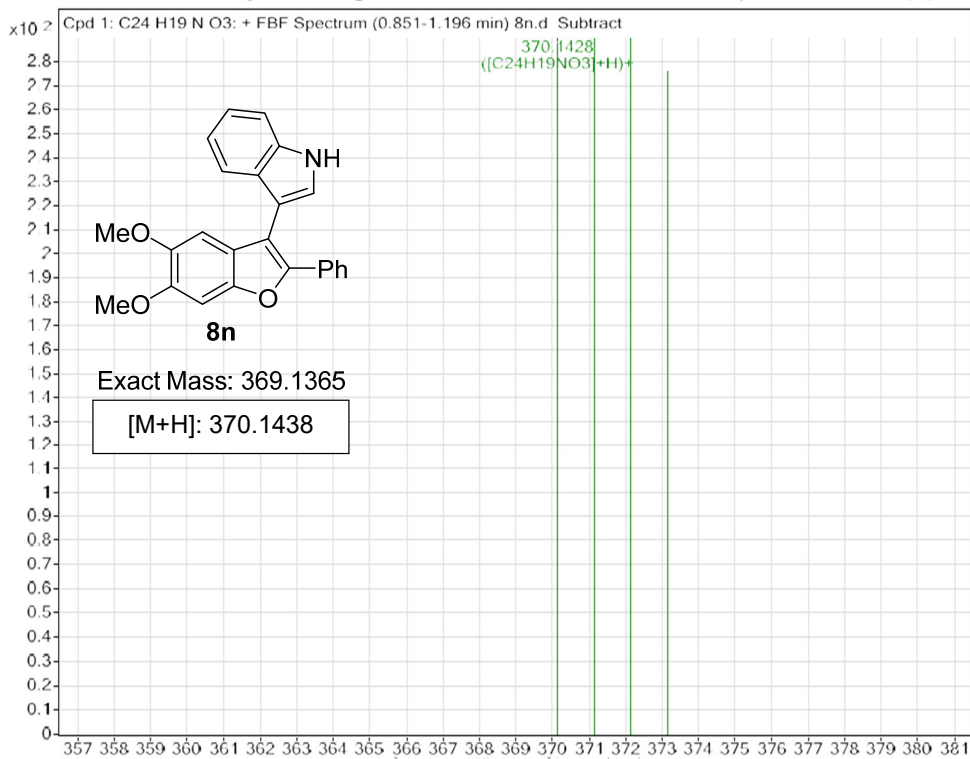

Data Filename 8o.d ACQ Method Comment Sample information is unavailable Acquired Time Unavailable

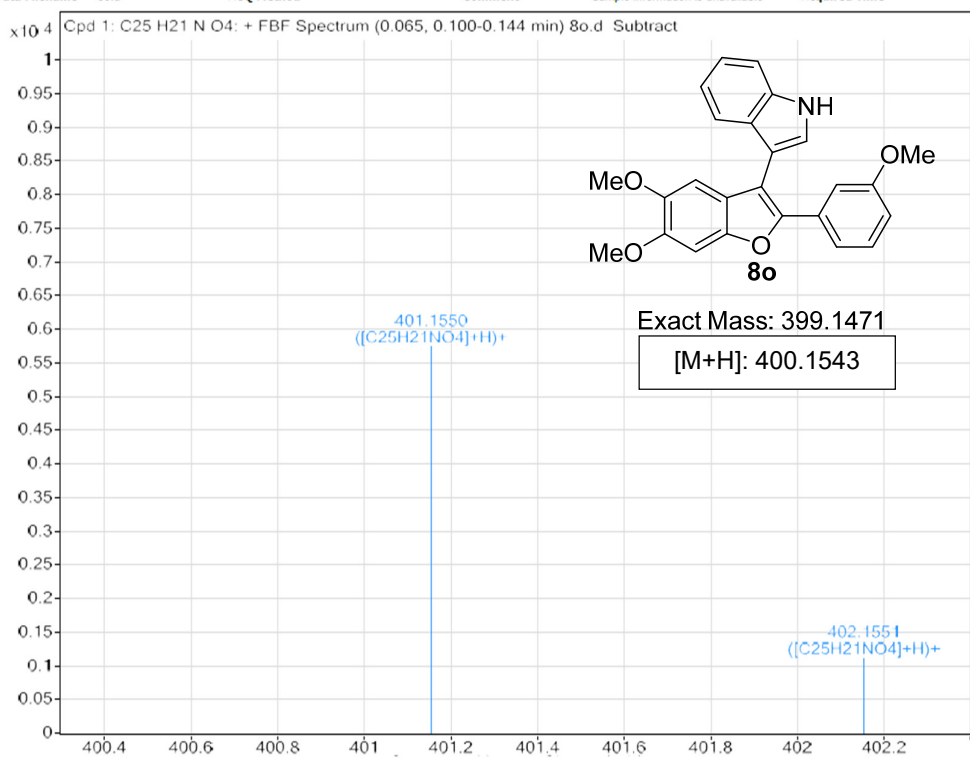

Data Filename: 8p.d ACQ Method: 506k\_leesunhee.m\_A2 Comment: Acquired Time: 6/16/2023 10:47:27 AM

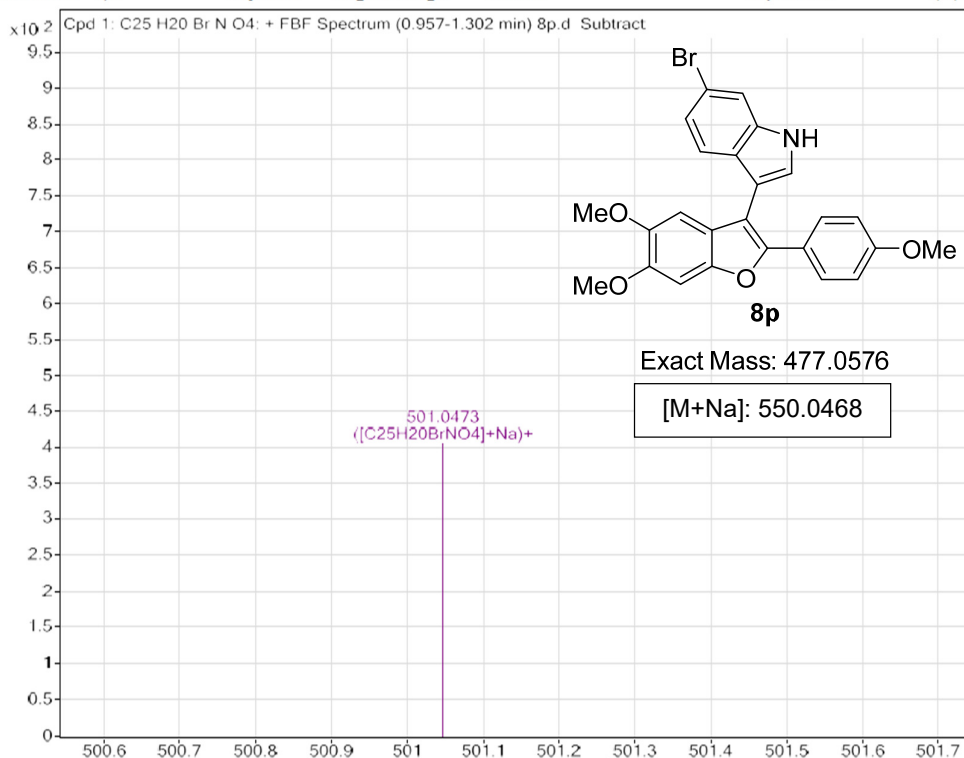

Data Filename: 8q.d ACQ Method: 506k\_leesunhee.m Comment: Acquired Time: 5/19/2023 5:39:56 PM

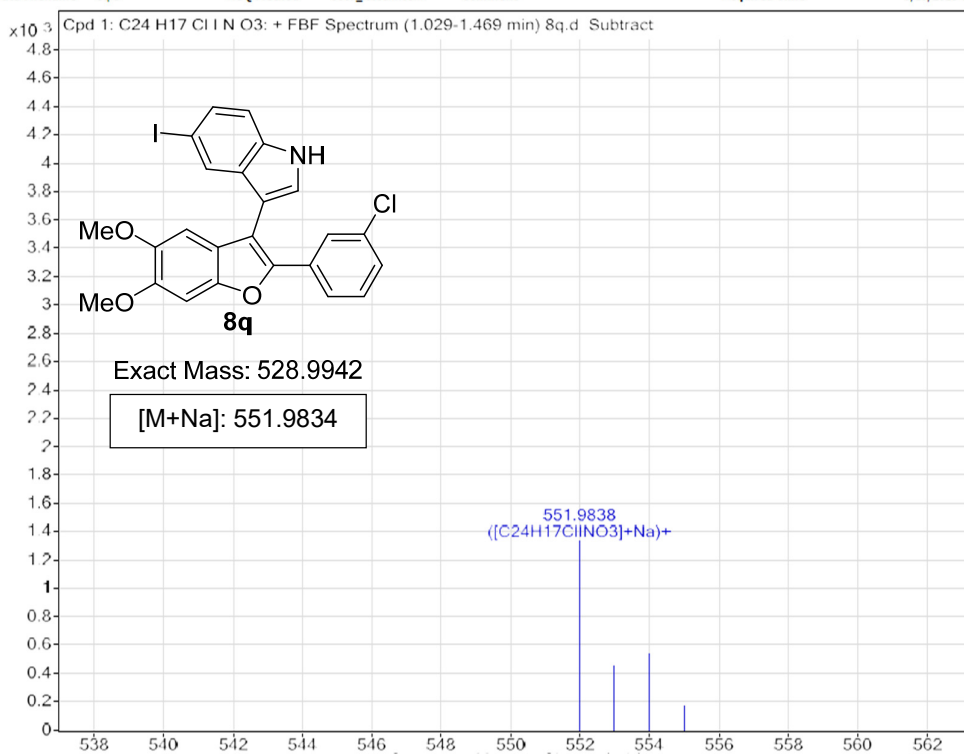

Data Filename 8r.d ACQ Method 506k\_leesunhee.m Comment Acquired Time 5/19/2023 5:43:40 PM

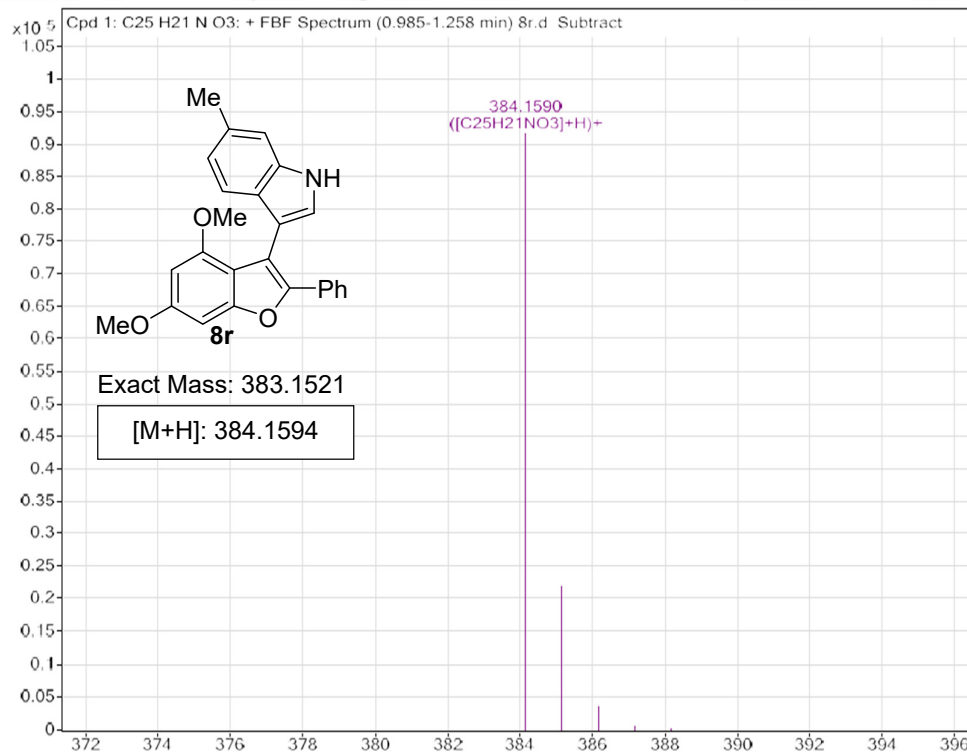

Data Filename 8s.d ACQ Method 506k\_leesunhee.m Comment Acquired Time 5/19/2023 5:47:23 PM

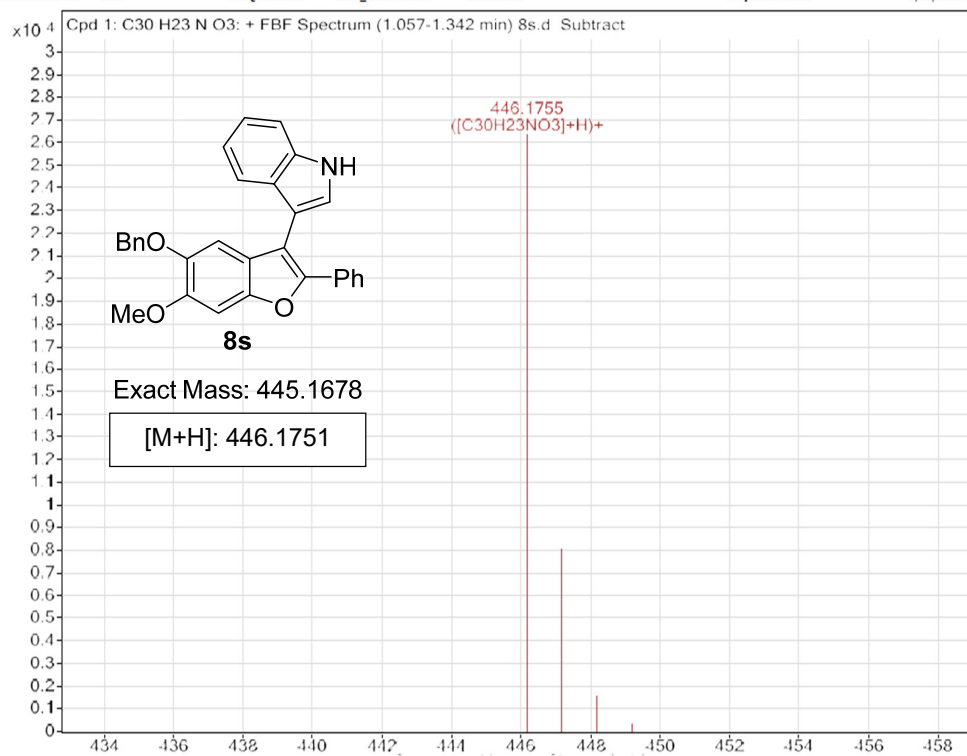

Data Filename: 8t.d      ACQ Method: 506k\_jeesunhee.m      Comment:      Acquired Time: 5/19/2023 5:51:05 PM

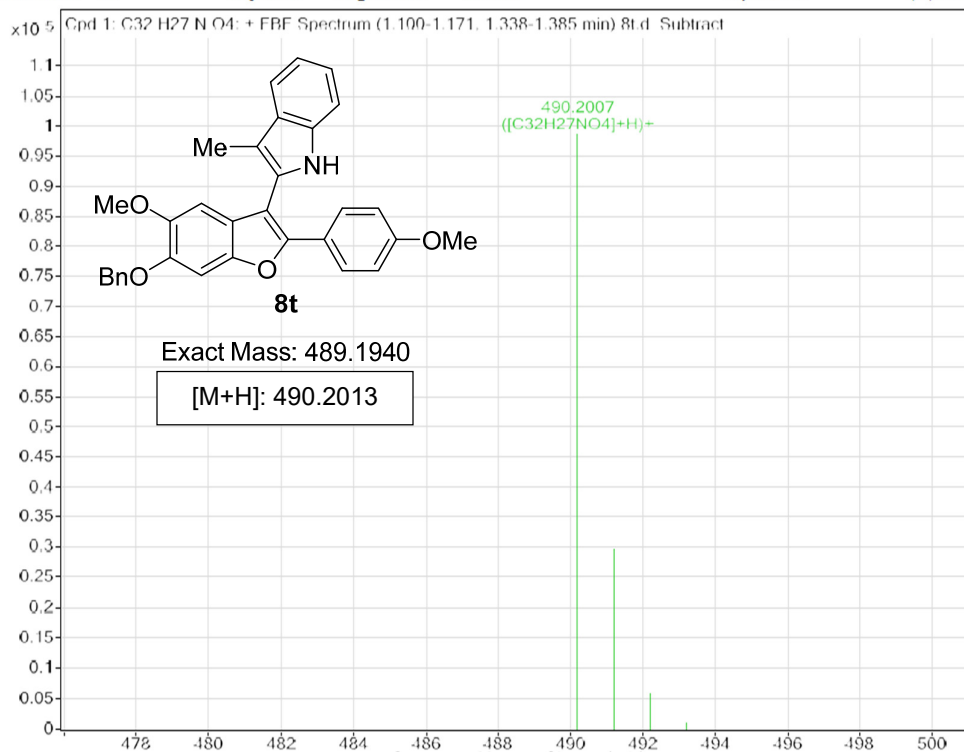

Data Filename: 8u.d      ACQ Method:      Comment:      Sample information is unavailable      Acquired Time:      Unavailable

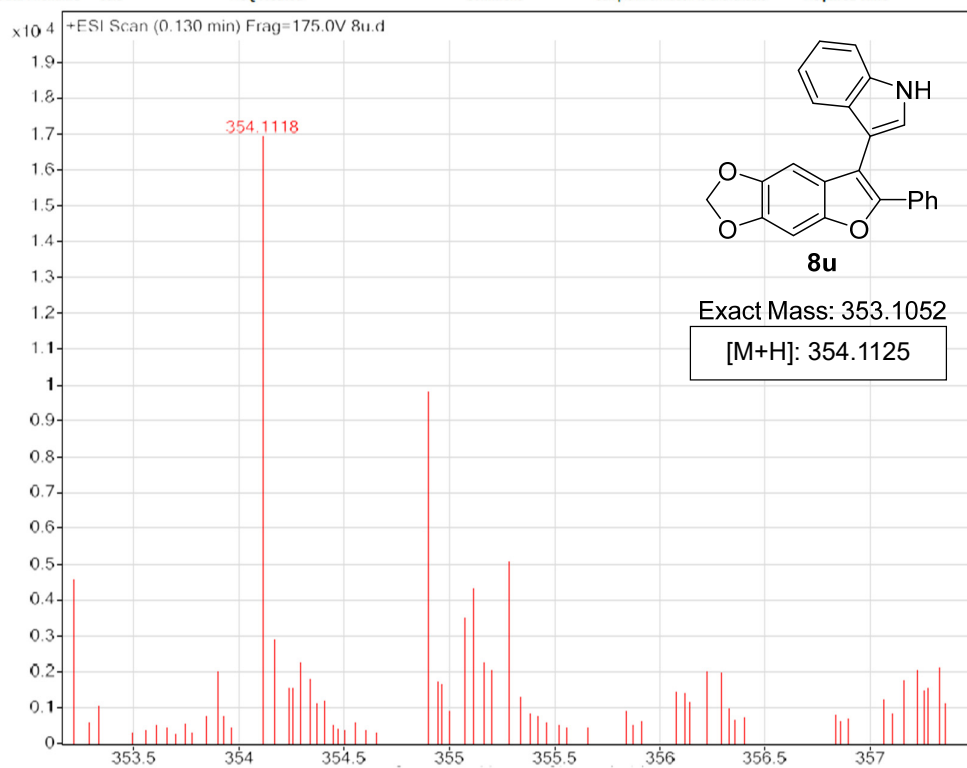

Data Filename v.d ACQ Method 506k\_jeesunhee.m\_A2 Comment Acquired Time 7/13/2023 5:57:48 PM

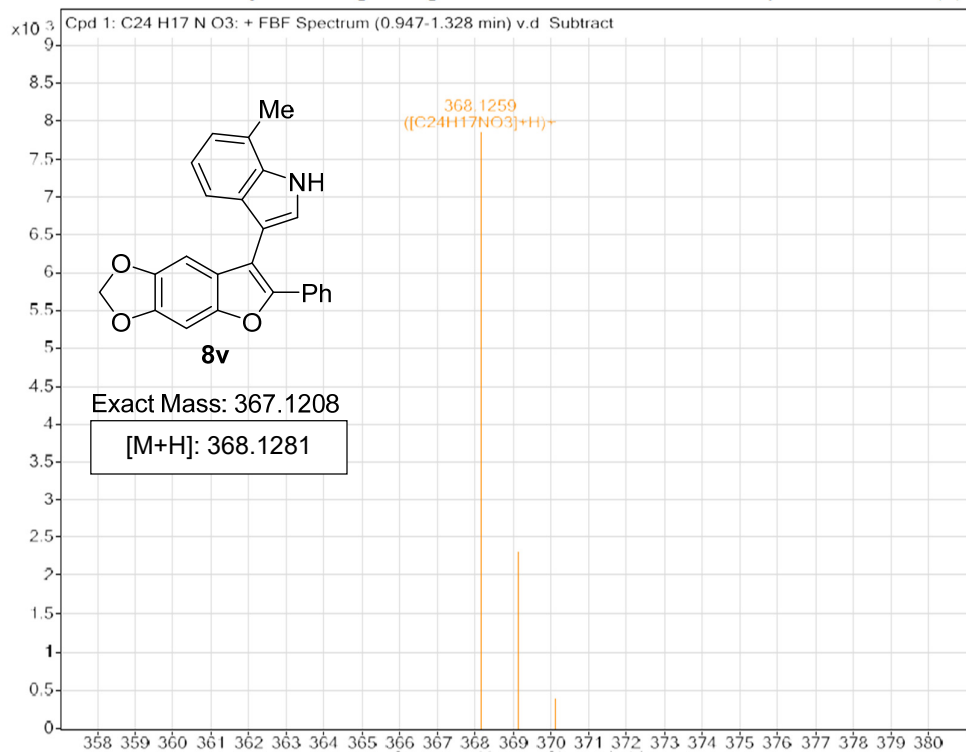

Data Filename 8w.d ACQ Method 506k\_jeesunhee.m Comment Acquired Time 5/19/2023 6:02:12 PM

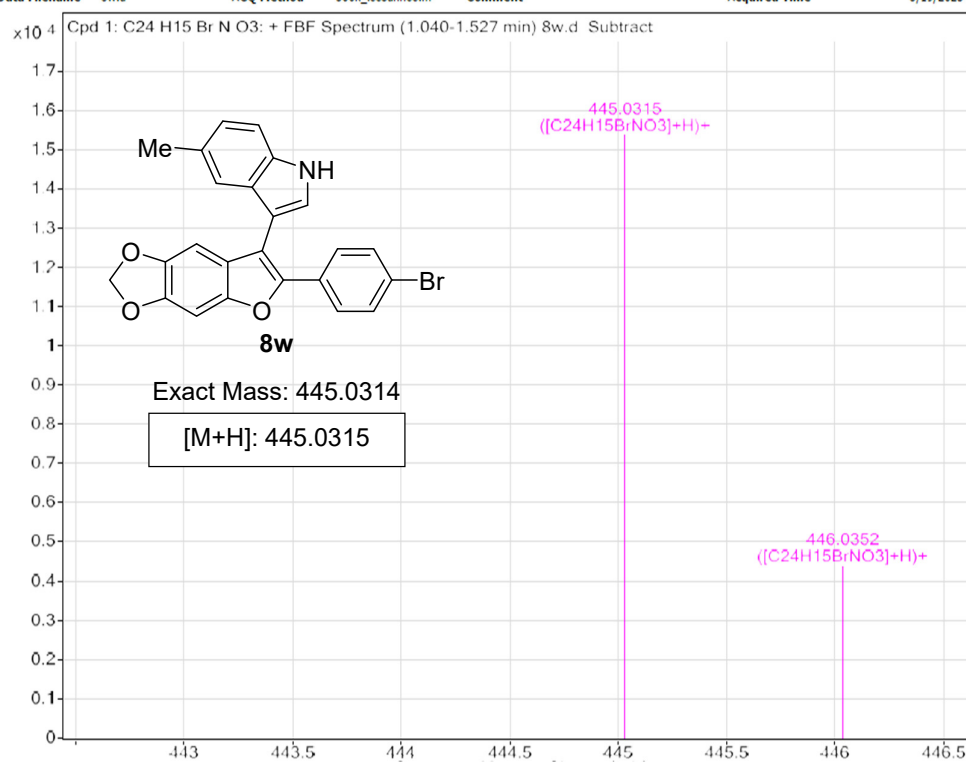



Data Filename x.d ACQ Method 506k\_jeesunhee.m\_A2. Comment Acquired Time 7/13/2023 6:05:14 PM

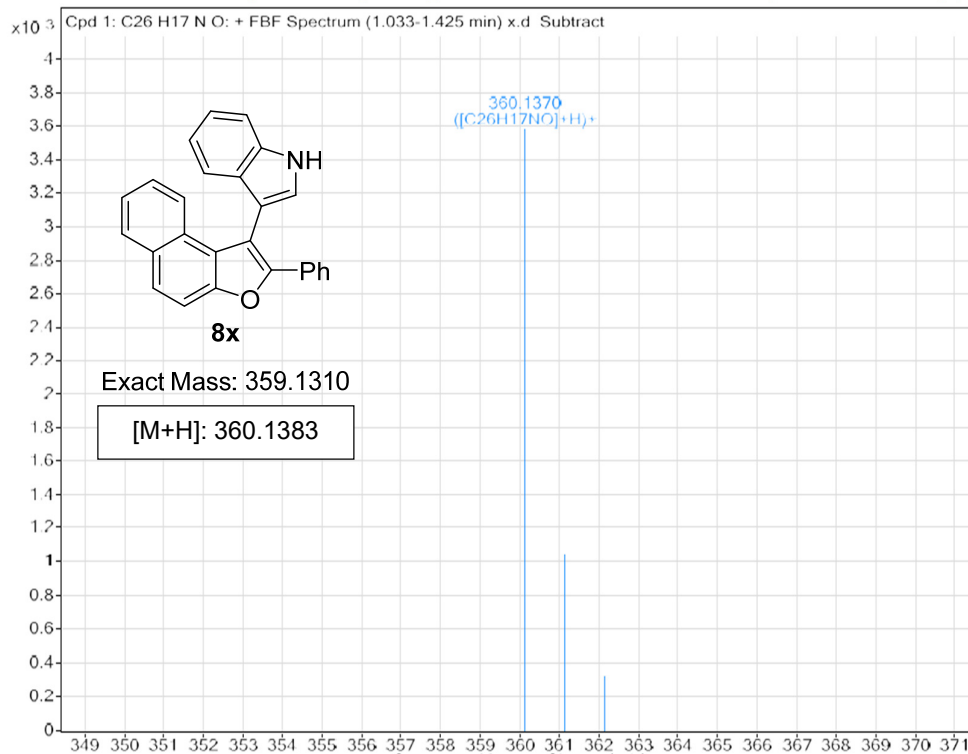

Data Filename 8y.d ACQ Method 506k\_jeesunhee.m\_A2. Comment Acquired Time 1/29/2024 3:21:23 PM

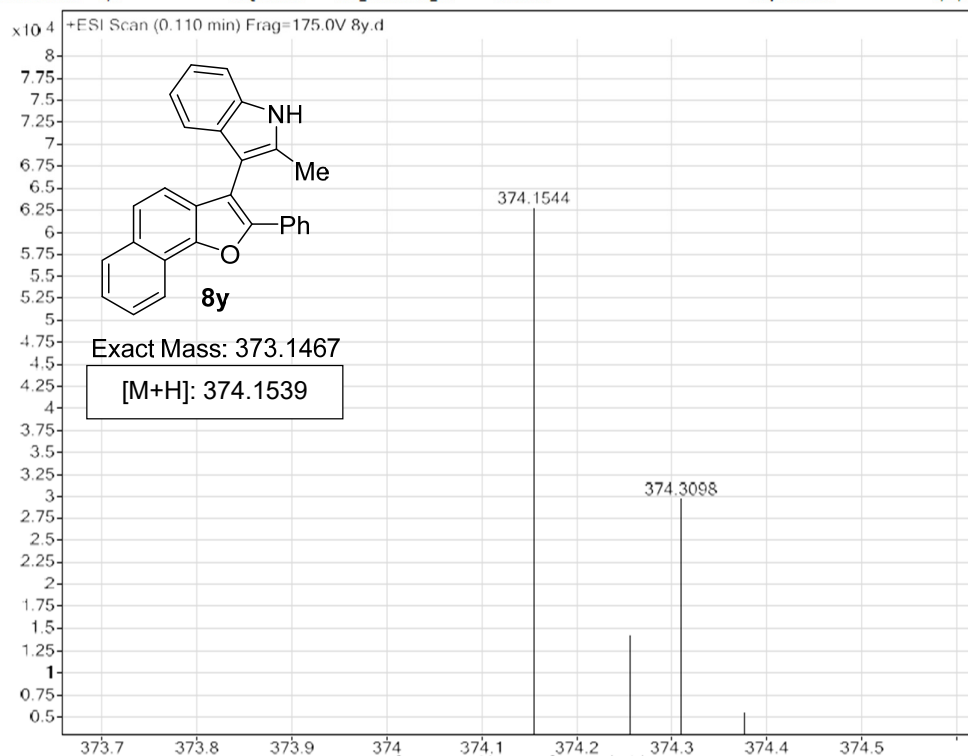

Data Filename 8z.d ACQ Method 506k\_jeesunhee.m\_A2. Comment Acquired Time 1/29/2024 3:25:08 PM

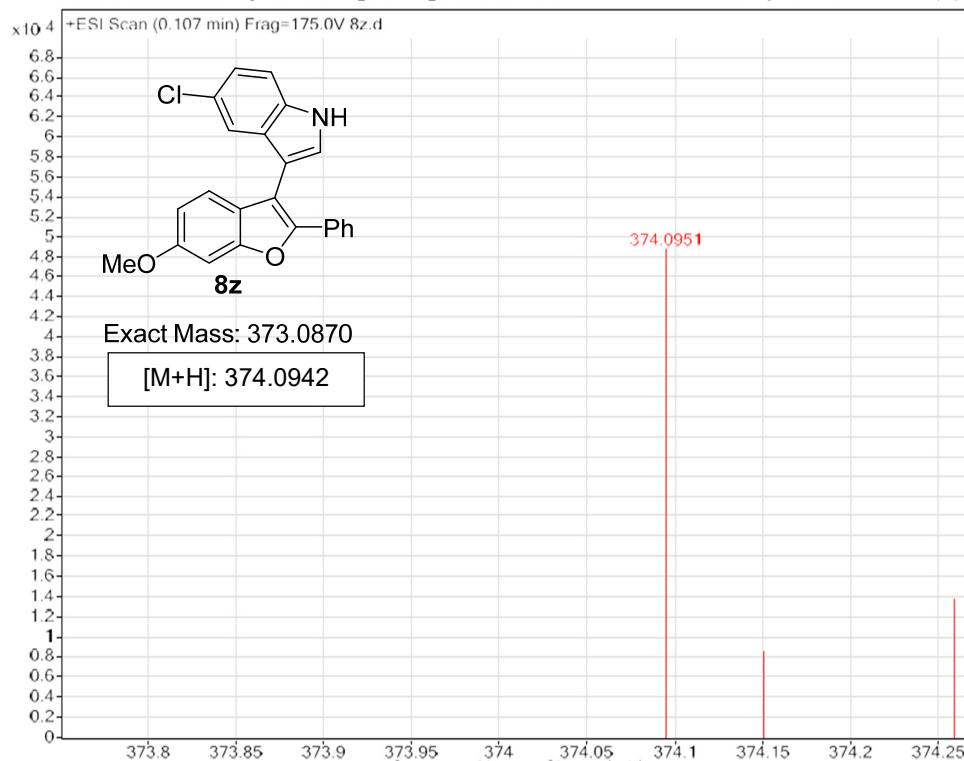

Data Filename 8aa.d ACQ Method 506k\_jeesunhee.m\_A2. Comment Acquired Time 6/23/2023 11:29:32 AM

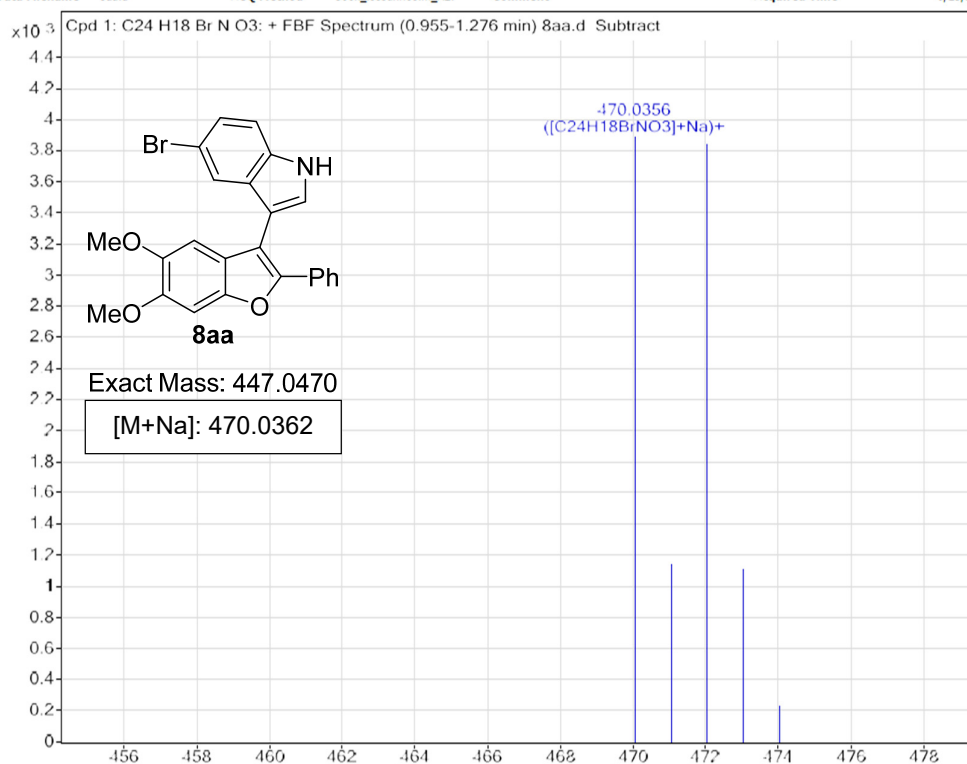

Data Filename 8ab.d ACQ Method 506k\_jeesunhee.m\_A2. Comment Acquired Time 6/16/2023 10:47:27 AM

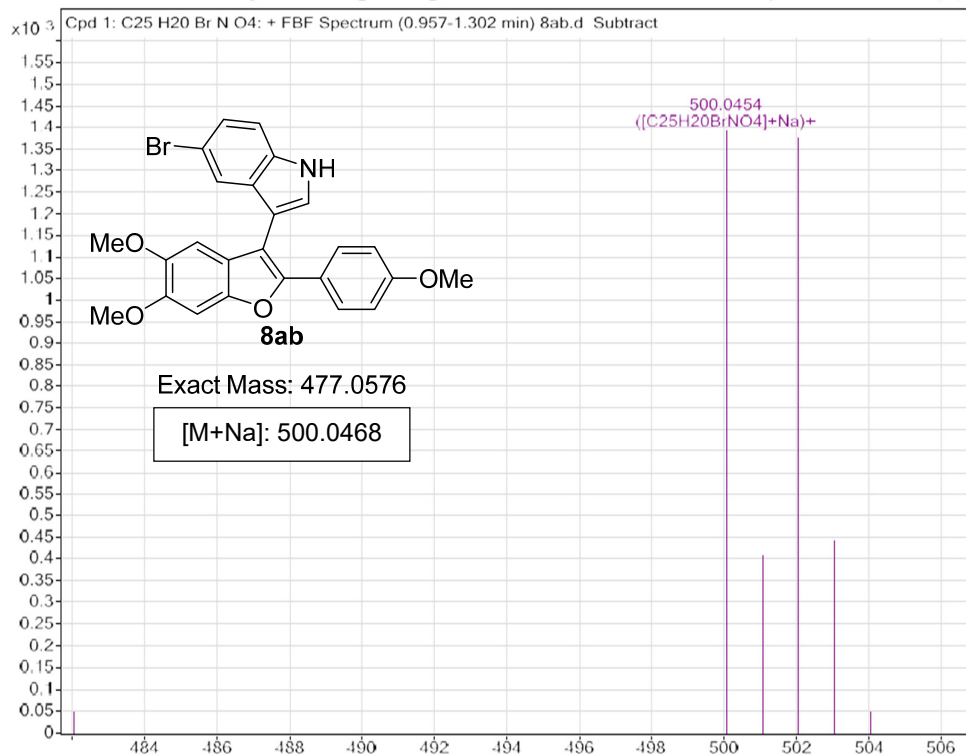

Data Filename ac.d ACQ Method 506k\_jeesunhee.m\_A2. Comment Acquired Time 7/13/2023 6:16:23 PM

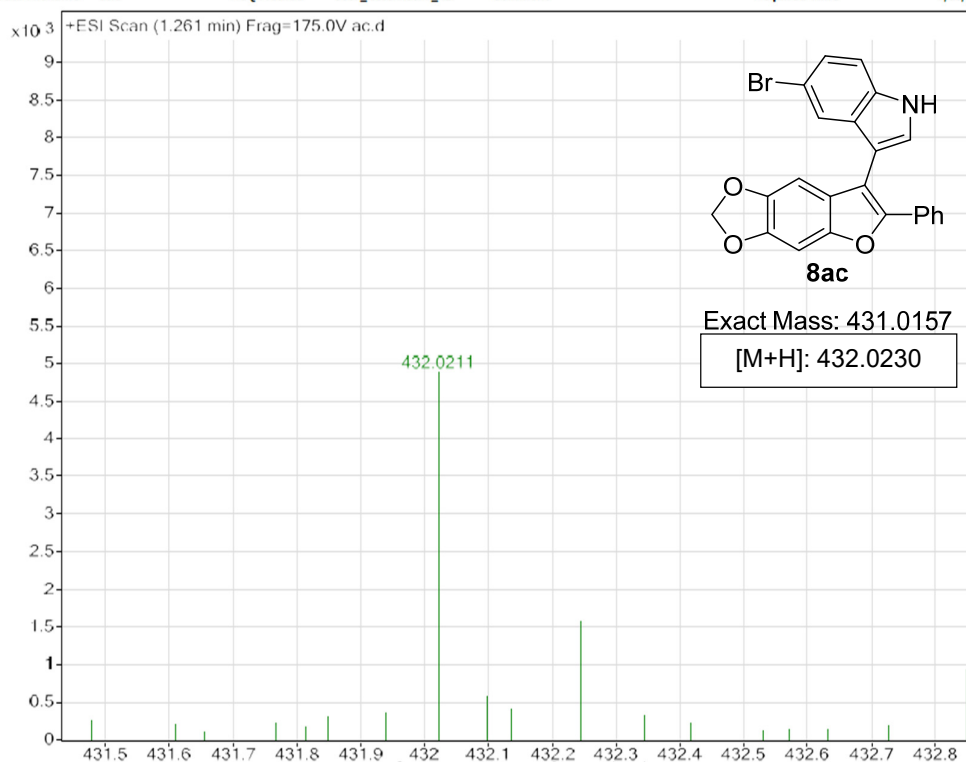

Data Filename: ad.d      ACQ Method: 506k\_jeesunhee.m\_A2      Comment:      Acquired Time: 7/13/2023 6:20:07 PM

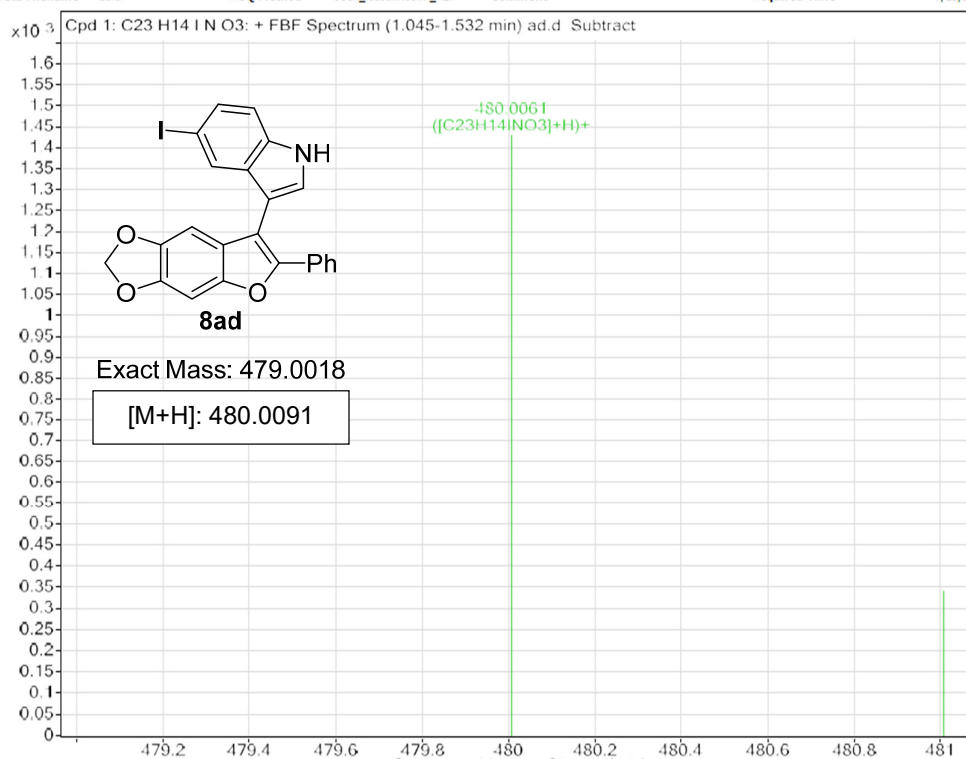

### Purity of 8aa measured by HPLC

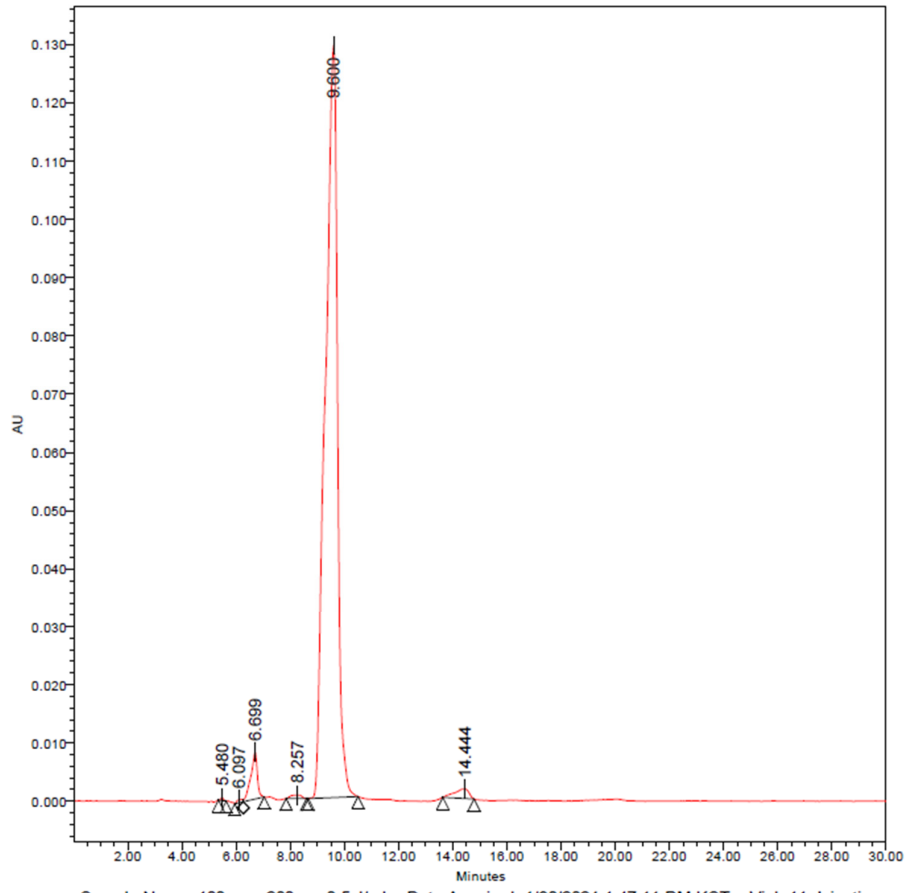

— Sample Name: 100ppm\_200nm\_0.5ul/ml; Date Acquired: 1/30/2024 1:47:11 PM KST; Vial: 11; Injection:

### Peak Summary with Statistics

Name:

|           | Sample Name           | Vial | Inj | Retention Time (min) | Area    | % Area | Height |
|-----------|-----------------------|------|-----|----------------------|---------|--------|--------|
| 1         | 100ppm_200nm_0.5ul/ml | 11   | 1   | 5.480                | 3532    | 0.08   | 510    |
| 2         | 100ppm_200nm_0.5ul/ml | 11   | 1   | 6.097                | 7370    | 0.17   | 497    |
| 3         | 100ppm_200nm_0.5ul/ml | 11   | 1   | 14.444               | 60905   | 1.44   | 1617   |
| 4         | 100ppm_200nm_0.5ul/ml | 11   | 1   | 8.257                | 16691   | 0.39   | 601    |
| 5         | 100ppm_200nm_0.5ul/ml | 11   | 1   | 9.600                | 4013420 | 94.75  | 129276 |
| 6         | 100ppm_200nm_0.5ul/ml | 11   | 1   | 6.699                | 134010  | 3.16   | 8022   |
| Mean      |                       |      |     | 8.429                |         |        |        |
| Std. Dev. |                       |      |     | 3.308                |         |        |        |
| % RSD     |                       |      |     | 39.24                |         |        |        |

| 8aa HPLC conditions      |                                                          |
|--------------------------|----------------------------------------------------------|
| Column                   | CHIRALPAK® C18 UG 5 $\mu$ m, 4.6 mm i.d. $\times$ 250 mm |
| Mobile phase             | Acetonitrile : Water = 8 : 2                             |
| Flow rate                | 0.5 mL/min                                               |
| Injection volume         | 10 $\mu$ L                                               |
| Detection                | 254 nm                                                   |
| Column Temperature       | 25 °C                                                    |
| Auto-sampler temperature | 25 °C                                                    |
| Retention time           | 9.6 minutes                                              |
